# Supplementary material
Source: Research Square preprint supplement (doi:10.21203/rs.3.rs-8953443/v1)
Supplement: Supplementary file 1 [file 145757f6641eb8a3ab3a72e4.xlsx]

## Sheet: OpenDengue_1990_2023
adm_0_name	adm_1_name	adm_2_name	full_name	ISO_A0	FAO_GAUL_code	RNE_iso_code	IBGE_code	calendar_start_date	calendar_end_date	Year	dengue_total	dengue_total_WHO2024	case_definition_standardised	S_res	T_res	UUID	region
INDONESIA	NA	NA	INDONESIA	IDN	1013696	IDN	NA	1968-01-01	1968-12-31	1968	58	58	Total	Admin0	Year	TYCHO-ALL-19242017-SV_DF01-00	SEARO
INDONESIA	NA	NA	INDONESIA	IDN	1013696	IDN	NA	1969-01-01	1969-12-31	1969	167	167	Total	Admin0	Year	TYCHO-ALL-19242017-SV_DF01-00	SEARO
INDONESIA	NA	NA	INDONESIA	IDN	1013696	IDN	NA	1970-01-01	1970-12-31	1970	477	477	Total	Admin0	Year	TYCHO-ALL-19242017-SV_DF01-00	SEARO
INDONESIA	NA	NA	INDONESIA	IDN	1013696	IDN	NA	1971-01-01	1971-12-31	1971	267	267	Total	Admin0	Year	TYCHO-ALL-19242017-SV_DF01-00	SEARO
INDONESIA	NA	NA	INDONESIA	IDN	1013696	IDN	NA	1972-01-01	1972-12-31	1972	1400	1400	Total	Admin0	Year	TYCHO-ALL-19242017-SV_DF01-00	SEARO
INDONESIA	NA	NA	INDONESIA	IDN	1013696	IDN	NA	1973-01-01	1973-12-31	1973	10189	10189	Total	Admin0	Year	TYCHO-ALL-19242017-SV_DF01-00	SEARO
INDONESIA	NA	NA	INDONESIA	IDN	1013696	IDN	NA	1974-01-01	1974-12-31	1974	4586	4586	Total	Admin0	Year	TYCHO-ALL-19242017-SV_DF01-00	SEARO
INDONESIA	NA	NA	INDONESIA	IDN	1013696	IDN	NA	1975-01-01	1975-12-31	1975	4563	4563	Total	Admin0	Year	TYCHO-ALL-19242017-SV_DF01-00	SEARO
INDONESIA	NA	NA	INDONESIA	IDN	1013696	IDN	NA	1976-01-01	1976-12-31	1976	4548	4548	Total	Admin0	Year	TYCHO-ALL-19242017-SV_DF01-00	SEARO
INDONESIA	NA	NA	INDONESIA	IDN	1013696	IDN	NA	1977-01-01	1977-12-31	1977	7826	7826	Total	Admin0	Year	TYCHO-ALL-19242017-SV_DF01-00	SEARO
INDONESIA	NA	NA	INDONESIA	IDN	1013696	IDN	NA	1978-01-01	1978-12-31	1978	6989	6989	Total	Admin0	Year	TYCHO-ALL-19242017-SV_DF01-00	SEARO
INDONESIA	NA	NA	INDONESIA	IDN	1013696	IDN	NA	1979-01-01	1979-12-31	1979	3422	3422	Total	Admin0	Year	TYCHO-ALL-19242017-SV_DF01-00	SEARO
INDONESIA	NA	NA	INDONESIA	IDN	1013696	IDN	NA	1980-01-01	1980-12-31	1980	5007	5007	Total	Admin0	Year	TYCHO-ALL-19242017-SV_DF01-00	SEARO
INDONESIA	NA	NA	INDONESIA	IDN	1013696	IDN	NA	1981-01-01	1981-12-31	1981	5909	5909	Total	Admin0	Year	TYCHO-ALL-19242017-SV_DF01-00	SEARO
INDONESIA	NA	NA	INDONESIA	IDN	1013696	IDN	NA	1982-01-01	1982-12-31	1982	4665	4665	Total	Admin0	Year	TYCHO-ALL-19242017-SV_DF01-00	SEARO
INDONESIA	NA	NA	INDONESIA	IDN	1013696	IDN	NA	1983-01-01	1983-12-31	1983	13875	13875	Total	Admin0	Year	TYCHO-ALL-19242017-SV_DF01-00	SEARO
INDONESIA	NA	NA	INDONESIA	IDN	1013696	IDN	NA	1984-01-01	1984-12-31	1984	12710	12710	Total	Admin0	Year	TYCHO-ALL-19242017-SV_DF01-00	SEARO
INDONESIA	NA	NA	INDONESIA	IDN	1013696	IDN	NA	1985-01-01	1985-12-31	1985	13588	13588	Total	Admin0	Year	WHOSEARO-ALL-19852009-Y01-00	SEARO
INDONESIA	NA	NA	INDONESIA	IDN	1013696	IDN	NA	1986-01-01	1986-12-31	1986	16529	16529	Total	Admin0	Year	WHOSEARO-ALL-19852009-Y01-00	SEARO
INDONESIA	NA	NA	INDONESIA	IDN	1013696	IDN	NA	1987-01-01	1987-12-31	1987	23864	23864	Total	Admin0	Year	WHOSEARO-ALL-19852009-Y01-00	SEARO
INDONESIA	NA	NA	INDONESIA	IDN	1013696	IDN	NA	1988-01-01	1988-12-31	1988	44573	44573	Total	Admin0	Year	WHOSEARO-ALL-19852009-Y01-00	SEARO
INDONESIA	NA	NA	INDONESIA	IDN	1013696	IDN	NA	1989-01-01	1989-12-31	1989	10362	10362	Total	Admin0	Year	WHOSEARO-ALL-19852009-Y01-00	SEARO
INDONESIA	NA	NA	INDONESIA	IDN	1013696	IDN	NA	1990-01-01	1990-12-31	1990	22807	22807	Total	Admin0	Year	WHOSEARO-ALL-19852009-Y01-00	SEARO
INDONESIA	NA	NA	INDONESIA	IDN	1013696	IDN	NA	1991-01-01	1991-12-31	1991	21120	21120	Total	Admin0	Year	WHOSEARO-ALL-19852009-Y01-00	SEARO
INDONESIA	NA	NA	INDONESIA	IDN	1013696	IDN	NA	1992-01-01	1992-12-31	1992	17620	17620	Total	Admin0	Year	WHOSEARO-ALL-19852009-Y01-00	SEARO
INDONESIA	NA	NA	INDONESIA	IDN	1013696	IDN	NA	1993-01-01	1993-12-31	1993	17418	17418	Total	Admin0	Year	WHOSEARO-ALL-19852009-Y01-00	SEARO
INDONESIA	NA	NA	INDONESIA	IDN	1013696	IDN	NA	1994-01-01	1994-12-31	1994	18783	18783	Total	Admin0	Year	WHOSEARO-ALL-19852009-Y01-00	SEARO
INDONESIA	NA	NA	INDONESIA	IDN	1013696	IDN	NA	1995-01-01	1995-12-31	1995	35102	35102	Total	Admin0	Year	WHOSEARO-ALL-19852009-Y01-00	SEARO
INDONESIA	NA	NA	INDONESIA	IDN	1013696	IDN	NA	1996-01-01	1996-12-31	1996	44650	44650	Total	Admin0	Year	WHOSEARO-ALL-19852009-Y01-00	SEARO
INDONESIA	NA	NA	INDONESIA	IDN	1013696	IDN	NA	1997-01-01	1997-12-31	1997	30730	30730	Total	Admin0	Year	WHOSEARO-ALL-19852009-Y01-00	SEARO
INDONESIA	NA	NA	INDONESIA	IDN	1013696	IDN	NA	1998-01-01	1998-12-31	1998	72133	72133	Total	Admin0	Year	WHOSEARO-ALL-19852009-Y01-00	SEARO
INDONESIA	NA	NA	INDONESIA	IDN	1013696	IDN	NA	1999-01-01	1999-12-31	1999	21134	21134	Total	Admin0	Year	WHOSEARO-ALL-19852009-Y01-00	SEARO
INDONESIA	NA	NA	INDONESIA	IDN	1013696	IDN	NA	2000-01-01	2000-12-31	2000	33443	33443	Total	Admin0	Year	WHOSEARO-ALL-19852009-Y01-00	SEARO
INDONESIA	NA	NA	INDONESIA	IDN	1013696	IDN	NA	2001-01-01	2001-12-31	2001	45904	45904	Total	Admin0	Year	WHOSEARO-ALL-19852009-Y01-00	SEARO
INDONESIA	NA	NA	INDONESIA	IDN	1013696	IDN	NA	2002-01-01	2002-12-31	2002	40377	40377	Total	Admin0	Year	WHOSEARO-ALL-19852009-Y01-00	SEARO
INDONESIA	NA	NA	INDONESIA	IDN	1013696	IDN	NA	2003-01-01	2003-12-31	2003	51934	51934	Total	Admin0	Year	WHOSEARO-ALL-19852009-Y01-00	SEARO
INDONESIA	NA	NA	INDONESIA	IDN	1013696	IDN	NA	2004-01-01	2004-12-31	2004	79462	79462	Total	Admin0	Year	WHOSEARO-ALL-19852009-Y01-00	SEARO
INDONESIA	NA	NA	INDONESIA	IDN	1013696	IDN	NA	2005-01-01	2005-12-31	2005	95279	95279	Total	Admin0	Year	WHOSEARO-ALL-19852009-Y01-00	SEARO
INDONESIA	NA	NA	INDONESIA	IDN	1013696	IDN	NA	2006-01-01	2006-12-31	2006	114656	114656	Total	Admin0	Year	MOH-IDN-2010-Y01-05	SEARO
INDONESIA	NA	NA	INDONESIA	IDN	1013696	IDN	NA	2007-01-01	2007-01-31	2007	20071	20071	Total	Admin0	Month	WHOSEARO-ALL-2024-Y03-00	SEARO
INDONESIA	NA	NA	INDONESIA	IDN	1013696	IDN	NA	2007-02-01	2007-02-28	2007	25848	25848	Total	Admin0	Month	WHOSEARO-ALL-2024-Y03-00	SEARO
INDONESIA	NA	NA	INDONESIA	IDN	1013696	IDN	NA	2007-03-01	2007-03-31	2007	20473	20473	Total	Admin0	Month	WHOSEARO-ALL-2024-Y03-00	SEARO
INDONESIA	NA	NA	INDONESIA	IDN	1013696	IDN	NA	2007-04-01	2007-04-30	2007	17343	17343	Total	Admin0	Month	WHOSEARO-ALL-2024-Y03-00	SEARO
INDONESIA	NA	NA	INDONESIA	IDN	1013696	IDN	NA	2007-05-01	2007-05-31	2007	17221	17221	Total	Admin0	Month	WHOSEARO-ALL-2024-Y03-00	SEARO
INDONESIA	NA	NA	INDONESIA	IDN	1013696	IDN	NA	2007-06-01	2007-06-30	2007	13325	13325	Total	Admin0	Month	WHOSEARO-ALL-2024-Y03-00	SEARO
INDONESIA	NA	NA	INDONESIA	IDN	1013696	IDN	NA	2007-07-01	2007-07-31	2007	10449	10449	Total	Admin0	Month	WHOSEARO-ALL-2024-Y03-00	SEARO
INDONESIA	NA	NA	INDONESIA	IDN	1013696	IDN	NA	2007-08-01	2007-08-31	2007	7470	7470	Total	Admin0	Month	WHOSEARO-ALL-2024-Y03-00	SEARO
INDONESIA	NA	NA	INDONESIA	IDN	1013696	IDN	NA	2007-09-01	2007-09-30	2007	5181	5181	Total	Admin0	Month	WHOSEARO-ALL-2024-Y03-00	SEARO
INDONESIA	NA	NA	INDONESIA	IDN	1013696	IDN	NA	2007-10-01	2007-10-31	2007	5047	5047	Total	Admin0	Month	WHOSEARO-ALL-2024-Y03-00	SEARO
INDONESIA	NA	NA	INDONESIA	IDN	1013696	IDN	NA	2007-11-01	2007-11-30	2007	6893	6893	Total	Admin0	Month	WHOSEARO-ALL-2024-Y03-00	SEARO
INDONESIA	NA	NA	INDONESIA	IDN	1013696	IDN	NA	2007-12-01	2007-12-31	2007	8794	8794	Total	Admin0	Month	WHOSEARO-ALL-2024-Y03-00	SEARO
INDONESIA	NA	NA	INDONESIA	IDN	1013696	IDN	NA	2008-01-01	2008-12-31	2008	155607	155607	Total	Admin0	Year	WHOSEARO-ALL-19852009-Y01-00	SEARO
INDONESIA	NA	NA	INDONESIA	IDN	1013696	IDN	NA	2009-06-01	2009-06-30	2009	14120	14120	Total	Admin0	Month	WHOSEARO-ALL-2024-Y03-00	SEARO
INDONESIA	NA	NA	INDONESIA	IDN	1013696	IDN	NA	2009-07-01	2009-07-31	2009	13703	13703	Total	Admin0	Month	WHOSEARO-ALL-2024-Y03-00	SEARO
INDONESIA	NA	NA	INDONESIA	IDN	1013696	IDN	NA	2009-08-01	2009-08-31	2009	9826	9826	Total	Admin0	Month	WHOSEARO-ALL-2024-Y03-00	SEARO
INDONESIA	NA	NA	INDONESIA	IDN	1013696	IDN	NA	2009-09-01	2009-09-30	2009	7598	7598	Total	Admin0	Month	WHOSEARO-ALL-2024-Y03-00	SEARO
INDONESIA	NA	NA	INDONESIA	IDN	1013696	IDN	NA	2009-10-01	2009-10-31	2009	8345	8345	Total	Admin0	Month	WHOSEARO-ALL-2024-Y03-00	SEARO
INDONESIA	NA	NA	INDONESIA	IDN	1013696	IDN	NA	2009-11-01	2009-11-30	2009	9850	9850	Total	Admin0	Month	WHOSEARO-ALL-2024-Y03-00	SEARO
INDONESIA	NA	NA	INDONESIA	IDN	1013696	IDN	NA	2009-01-01	2009-01-31	2009	18532	18532	Total	Admin0	Month	WHOSEARO-ALL-2024-Y03-00	SEARO
INDONESIA	NA	NA	INDONESIA	IDN	1013696	IDN	NA	2009-02-01	2009-02-28	2009	16545	16545	Total	Admin0	Month	WHOSEARO-ALL-2024-Y03-00	SEARO
INDONESIA	NA	NA	INDONESIA	IDN	1013696	IDN	NA	2009-03-01	2009-03-31	2009	17146	17146	Total	Admin0	Month	WHOSEARO-ALL-2024-Y03-00	SEARO
INDONESIA	NA	NA	INDONESIA	IDN	1013696	IDN	NA	2009-04-01	2009-04-30	2009	16647	16647	Total	Admin0	Month	WHOSEARO-ALL-2024-Y03-00	SEARO
INDONESIA	NA	NA	INDONESIA	IDN	1013696	IDN	NA	2009-05-01	2009-05-31	2009	15654	15654	Total	Admin0	Month	WHOSEARO-ALL-2024-Y03-00	SEARO
INDONESIA	NA	NA	INDONESIA	IDN	1013696	IDN	NA	2009-12-01	2009-12-31	2009	10946	10946	Total	Admin0	Month	WHOSEARO-ALL-2024-Y03-00	SEARO
INDONESIA	NA	NA	INDONESIA	IDN	1013696	IDN	NA	2010-12-01	2010-12-31	2010	5581	5581	Total	Admin0	Month	WHOSEARO-ALL-2024-Y03-00	SEARO
INDONESIA	NA	NA	INDONESIA	IDN	1013696	IDN	NA	2010-07-01	2010-07-31	2010	10929	10929	Total	Admin0	Month	WHOSEARO-ALL-2024-Y03-00	SEARO
INDONESIA	NA	NA	INDONESIA	IDN	1013696	IDN	NA	2010-08-01	2010-08-31	2010	9615	9615	Total	Admin0	Month	WHOSEARO-ALL-2024-Y03-00	SEARO
INDONESIA	NA	NA	INDONESIA	IDN	1013696	IDN	NA	2010-09-01	2010-09-30	2010	7986	7986	Total	Admin0	Month	WHOSEARO-ALL-2024-Y03-00	SEARO
INDONESIA	NA	NA	INDONESIA	IDN	1013696	IDN	NA	2010-10-01	2010-10-31	2010	8149	8149	Total	Admin0	Month	WHOSEARO-ALL-2024-Y03-00	SEARO
INDONESIA	NA	NA	INDONESIA	IDN	1013696	IDN	NA	2010-11-01	2010-11-30	2010	7705	7705	Total	Admin0	Month	WHOSEARO-ALL-2024-Y03-00	SEARO
INDONESIA	NA	NA	INDONESIA	IDN	1013696	IDN	NA	2010-03-01	2010-03-31	2010	19554	19554	Total	Admin0	Month	WHOSEARO-ALL-2024-Y03-00	SEARO
INDONESIA	NA	NA	INDONESIA	IDN	1013696	IDN	NA	2010-04-01	2010-04-30	2010	16274	16274	Total	Admin0	Month	WHOSEARO-ALL-2024-Y03-00	SEARO
INDONESIA	NA	NA	INDONESIA	IDN	1013696	IDN	NA	2010-05-01	2010-05-31	2010	13364	13364	Total	Admin0	Month	WHOSEARO-ALL-2024-Y03-00	SEARO
INDONESIA	NA	NA	INDONESIA	IDN	1013696	IDN	NA	2010-06-01	2010-06-30	2010	11643	11643	Total	Admin0	Month	WHOSEARO-ALL-2024-Y03-00	SEARO
INDONESIA	NA	NA	INDONESIA	IDN	1013696	IDN	NA	2010-01-01	2010-01-31	2010	22796	22796	Total	Admin0	Month	WHOSEARO-ALL-2024-Y03-00	SEARO
INDONESIA	NA	NA	INDONESIA	IDN	1013696	IDN	NA	2010-02-01	2010-02-28	2010	22490	22490	Total	Admin0	Month	WHOSEARO-ALL-2024-Y03-00	SEARO
INDONESIA	NA	NA	INDONESIA	IDN	1013696	IDN	NA	2011-01-01	2011-01-31	2011	8492	8492	Total	Admin0	Month	WHOSEARO-ALL-2024-Y03-00	SEARO
INDONESIA	NA	NA	INDONESIA	IDN	1013696	IDN	NA	2011-02-01	2011-02-28	2011	6602	6602	Total	Admin0	Month	WHOSEARO-ALL-2024-Y03-00	SEARO
INDONESIA	NA	NA	INDONESIA	IDN	1013696	IDN	NA	2011-03-01	2011-03-31	2011	6474	6474	Total	Admin0	Month	WHOSEARO-ALL-2024-Y03-00	SEARO
INDONESIA	NA	NA	INDONESIA	IDN	1013696	IDN	NA	2011-08-01	2011-08-31	2011	4372	4372	Total	Admin0	Month	WHOSEARO-ALL-2024-Y03-00	SEARO
INDONESIA	NA	NA	INDONESIA	IDN	1013696	IDN	NA	2011-09-01	2011-09-30	2011	3913	3913	Total	Admin0	Month	WHOSEARO-ALL-2024-Y03-00	SEARO
INDONESIA	NA	NA	INDONESIA	IDN	1013696	IDN	NA	2011-10-01	2011-10-31	2011	4837	4837	Total	Admin0	Month	WHOSEARO-ALL-2024-Y03-00	SEARO
INDONESIA	NA	NA	INDONESIA	IDN	1013696	IDN	NA	2011-11-01	2011-11-30	2011	5725	5725	Total	Admin0	Month	WHOSEARO-ALL-2024-Y03-00	SEARO
INDONESIA	NA	NA	INDONESIA	IDN	1013696	IDN	NA	2011-12-01	2011-12-31	2011	6743	6743	Total	Admin0	Month	WHOSEARO-ALL-2024-Y03-00	SEARO
INDONESIA	NA	NA	INDONESIA	IDN	1013696	IDN	NA	2011-04-01	2011-04-30	2011	4838	4838	Total	Admin0	Month	WHOSEARO-ALL-2024-Y03-00	SEARO
INDONESIA	NA	NA	INDONESIA	IDN	1013696	IDN	NA	2011-05-01	2011-05-31	2011	4811	4811	Total	Admin0	Month	WHOSEARO-ALL-2024-Y03-00	SEARO
INDONESIA	NA	NA	INDONESIA	IDN	1013696	IDN	NA	2011-06-01	2011-06-30	2011	4486	4486	Total	Admin0	Month	WHOSEARO-ALL-2024-Y03-00	SEARO
INDONESIA	NA	NA	INDONESIA	IDN	1013696	IDN	NA	2011-07-01	2011-07-31	2011	4432	4432	Total	Admin0	Month	WHOSEARO-ALL-2024-Y03-00	SEARO
INDONESIA	NA	NA	INDONESIA	IDN	1013696	IDN	NA	2012-01-01	2012-01-31	2012	11396	11396	Total	Admin0	Month	WHOSEARO-ALL-2024-Y03-00	SEARO
INDONESIA	NA	NA	INDONESIA	IDN	1013696	IDN	NA	2012-02-01	2012-02-29	2012	11074	11074	Total	Admin0	Month	WHOSEARO-ALL-2024-Y03-00	SEARO
INDONESIA	NA	NA	INDONESIA	IDN	1013696	IDN	NA	2012-03-01	2012-03-31	2012	9355	9355	Total	Admin0	Month	WHOSEARO-ALL-2024-Y03-00	SEARO
INDONESIA	NA	NA	INDONESIA	IDN	1013696	IDN	NA	2012-04-01	2012-04-30	2012	7983	7983	Total	Admin0	Month	WHOSEARO-ALL-2024-Y03-00	SEARO
INDONESIA	NA	NA	INDONESIA	IDN	1013696	IDN	NA	2012-09-01	2012-09-30	2012	4341	4341	Total	Admin0	Month	WHOSEARO-ALL-2024-Y03-00	SEARO
INDONESIA	NA	NA	INDONESIA	IDN	1013696	IDN	NA	2012-10-01	2012-10-31	2012	5507	5507	Total	Admin0	Month	WHOSEARO-ALL-2024-Y03-00	SEARO
INDONESIA	NA	NA	INDONESIA	IDN	1013696	IDN	NA	2012-11-01	2012-11-30	2012	6750	6750	Total	Admin0	Month	WHOSEARO-ALL-2024-Y03-00	SEARO
INDONESIA	NA	NA	INDONESIA	IDN	1013696	IDN	NA	2012-12-01	2012-12-31	2012	8484	8484	Total	Admin0	Month	WHOSEARO-ALL-2024-Y03-00	SEARO
INDONESIA	NA	NA	INDONESIA	IDN	1013696	IDN	NA	2012-05-01	2012-05-31	2012	7999	7999	Total	Admin0	Month	WHOSEARO-ALL-2024-Y03-00	SEARO
INDONESIA	NA	NA	INDONESIA	IDN	1013696	IDN	NA	2012-06-01	2012-06-30	2012	6887	6887	Total	Admin0	Month	WHOSEARO-ALL-2024-Y03-00	SEARO
INDONESIA	NA	NA	INDONESIA	IDN	1013696	IDN	NA	2012-07-01	2012-07-31	2012	6009	6009	Total	Admin0	Month	WHOSEARO-ALL-2024-Y03-00	SEARO
INDONESIA	NA	NA	INDONESIA	IDN	1013696	IDN	NA	2012-08-01	2012-08-31	2012	4460	4460	Total	Admin0	Month	WHOSEARO-ALL-2024-Y03-00	SEARO
INDONESIA	NA	NA	INDONESIA	IDN	1013696	IDN	NA	2013-01-01	2013-01-31	2013	17230	17230	Total	Admin0	Month	WHOSEARO-ALL-2024-Y03-00	SEARO
INDONESIA	NA	NA	INDONESIA	IDN	1013696	IDN	NA	2013-02-01	2013-02-28	2013	14070	14070	Total	Admin0	Month	WHOSEARO-ALL-2024-Y03-00	SEARO
INDONESIA	NA	NA	INDONESIA	IDN	1013696	IDN	NA	2013-03-01	2013-03-31	2013	12022	12022	Total	Admin0	Month	WHOSEARO-ALL-2024-Y03-00	SEARO
INDONESIA	NA	NA	INDONESIA	IDN	1013696	IDN	NA	2013-04-01	2013-04-30	2013	11907	11907	Total	Admin0	Month	WHOSEARO-ALL-2024-Y03-00	SEARO
INDONESIA	NA	NA	INDONESIA	IDN	1013696	IDN	NA	2013-05-01	2013-05-31	2013	10871	10871	Total	Admin0	Month	WHOSEARO-ALL-2024-Y03-00	SEARO
INDONESIA	NA	NA	INDONESIA	IDN	1013696	IDN	NA	2013-10-01	2013-10-31	2013	5703	5703	Total	Admin0	Month	WHOSEARO-ALL-2024-Y03-00	SEARO
INDONESIA	NA	NA	INDONESIA	IDN	1013696	IDN	NA	2013-11-01	2013-11-30	2013	4870	4870	Total	Admin0	Month	WHOSEARO-ALL-2024-Y03-00	SEARO
INDONESIA	NA	NA	INDONESIA	IDN	1013696	IDN	NA	2013-12-01	2013-12-31	2013	4706	4706	Total	Admin0	Month	WHOSEARO-ALL-2024-Y03-00	SEARO
INDONESIA	NA	NA	INDONESIA	IDN	1013696	IDN	NA	2013-06-01	2013-06-30	2013	9170	9170	Total	Admin0	Month	WHOSEARO-ALL-2024-Y03-00	SEARO
INDONESIA	NA	NA	INDONESIA	IDN	1013696	IDN	NA	2013-07-01	2013-07-31	2013	8726	8726	Total	Admin0	Month	WHOSEARO-ALL-2024-Y03-00	SEARO
INDONESIA	NA	NA	INDONESIA	IDN	1013696	IDN	NA	2013-08-01	2013-08-31	2013	7173	7173	Total	Admin0	Month	WHOSEARO-ALL-2024-Y03-00	SEARO
INDONESIA	NA	NA	INDONESIA	IDN	1013696	IDN	NA	2013-09-01	2013-09-30	2013	6063	6063	Total	Admin0	Month	WHOSEARO-ALL-2024-Y03-00	SEARO
INDONESIA	NA	NA	INDONESIA	IDN	1013696	IDN	NA	2014-01-01	2014-01-31	2014	9445	9445	Total	Admin0	Month	WHOSEARO-ALL-2024-Y03-00	SEARO
INDONESIA	NA	NA	INDONESIA	IDN	1013696	IDN	NA	2014-02-01	2014-02-28	2014	9410	9410	Total	Admin0	Month	WHOSEARO-ALL-2024-Y03-00	SEARO
INDONESIA	NA	NA	INDONESIA	IDN	1013696	IDN	NA	2014-03-01	2014-03-31	2014	8675	8675	Total	Admin0	Month	WHOSEARO-ALL-2024-Y03-00	SEARO
INDONESIA	NA	NA	INDONESIA	IDN	1013696	IDN	NA	2014-04-01	2014-04-30	2014	9088	9088	Total	Admin0	Month	WHOSEARO-ALL-2024-Y03-00	SEARO
INDONESIA	NA	NA	INDONESIA	IDN	1013696	IDN	NA	2014-05-01	2014-05-31	2014	8896	8896	Total	Admin0	Month	WHOSEARO-ALL-2024-Y03-00	SEARO
INDONESIA	NA	NA	INDONESIA	IDN	1013696	IDN	NA	2014-06-01	2014-06-30	2014	8353	8353	Total	Admin0	Month	WHOSEARO-ALL-2024-Y03-00	SEARO
INDONESIA	NA	NA	INDONESIA	IDN	1013696	IDN	NA	2014-07-01	2014-07-31	2014	7360	7360	Total	Admin0	Month	WHOSEARO-ALL-2024-Y03-00	SEARO
INDONESIA	NA	NA	INDONESIA	IDN	1013696	IDN	NA	2014-08-01	2014-08-31	2014	7604	7604	Total	Admin0	Month	WHOSEARO-ALL-2024-Y03-00	SEARO
INDONESIA	NA	NA	INDONESIA	IDN	1013696	IDN	NA	2014-09-01	2014-09-30	2014	7634	7634	Total	Admin0	Month	WHOSEARO-ALL-2024-Y03-00	SEARO
INDONESIA	NA	NA	INDONESIA	IDN	1013696	IDN	NA	2014-10-01	2014-10-31	2014	8149	8149	Total	Admin0	Month	WHOSEARO-ALL-2024-Y03-00	SEARO
INDONESIA	NA	NA	INDONESIA	IDN	1013696	IDN	NA	2014-11-01	2014-11-30	2014	7877	7877	Total	Admin0	Month	WHOSEARO-ALL-2024-Y03-00	SEARO
INDONESIA	NA	NA	INDONESIA	IDN	1013696	IDN	NA	2014-12-01	2014-12-31	2014	7856	7856	Total	Admin0	Month	WHOSEARO-ALL-2024-Y03-00	SEARO
INDONESIA	NA	NA	INDONESIA	IDN	1013696	IDN	NA	2015-01-01	2015-01-31	2015	21267	21267	Total	Admin0	Month	WHOSEARO-IDN-2024-Y01-02	SEARO
INDONESIA	NA	NA	INDONESIA	IDN	1013696	IDN	NA	2015-02-01	2015-02-28	2015	20164	20164	Total	Admin0	Month	WHOSEARO-IDN-2024-Y01-02	SEARO
INDONESIA	NA	NA	INDONESIA	IDN	1013696	IDN	NA	2015-03-01	2015-03-31	2015	14884	14884	Total	Admin0	Month	WHOSEARO-IDN-2024-Y01-02	SEARO
INDONESIA	NA	NA	INDONESIA	IDN	1013696	IDN	NA	2015-04-01	2015-04-30	2015	13664	13664	Total	Admin0	Month	WHOSEARO-IDN-2024-Y01-02	SEARO
INDONESIA	NA	NA	INDONESIA	IDN	1013696	IDN	NA	2015-05-01	2015-05-31	2015	11796	11796	Total	Admin0	Month	WHOSEARO-IDN-2024-Y01-02	SEARO
INDONESIA	NA	NA	INDONESIA	IDN	1013696	IDN	NA	2015-06-01	2015-06-30	2015	10007	10007	Total	Admin0	Month	WHOSEARO-IDN-2024-Y01-02	SEARO
INDONESIA	NA	NA	INDONESIA	IDN	1013696	IDN	NA	2015-07-01	2015-07-31	2015	7200	7200	Total	Admin0	Month	WHOSEARO-IDN-2024-Y01-02	SEARO
INDONESIA	NA	NA	INDONESIA	IDN	1013696	IDN	NA	2015-08-01	2015-08-31	2015	5501	5501	Total	Admin0	Month	WHOSEARO-IDN-2024-Y01-02	SEARO
INDONESIA	NA	NA	INDONESIA	IDN	1013696	IDN	NA	2015-09-01	2015-09-30	2015	4855	4855	Total	Admin0	Month	WHOSEARO-IDN-2024-Y01-02	SEARO
INDONESIA	NA	NA	INDONESIA	IDN	1013696	IDN	NA	2015-10-01	2015-10-31	2015	5221	5221	Total	Admin0	Month	WHOSEARO-IDN-2024-Y01-02	SEARO
INDONESIA	NA	NA	INDONESIA	IDN	1013696	IDN	NA	2015-11-01	2015-11-30	2015	6803	6803	Total	Admin0	Month	WHOSEARO-IDN-2024-Y01-02	SEARO
INDONESIA	NA	NA	INDONESIA	IDN	1013696	IDN	NA	2015-12-01	2015-12-31	2015	8327	8327	Total	Admin0	Month	WHOSEARO-IDN-2024-Y01-02	SEARO
INDONESIA	NA	NA	INDONESIA	IDN	1013696	IDN	NA	2016-01-01	2016-01-31	2016	29672	29672	Total	Admin0	Month	WHOSEARO-ALL-2024-Y03-00	SEARO
INDONESIA	NA	NA	INDONESIA	IDN	1013696	IDN	NA	2016-02-01	2016-02-29	2016	32117	32117	Total	Admin0	Month	WHOSEARO-ALL-2024-Y03-00	SEARO
INDONESIA	NA	NA	INDONESIA	IDN	1013696	IDN	NA	2016-03-01	2016-03-31	2016	27005	27005	Total	Admin0	Month	WHOSEARO-ALL-2024-Y03-00	SEARO
INDONESIA	NA	NA	INDONESIA	IDN	1013696	IDN	NA	2016-04-01	2016-04-30	2016	24239	24239	Total	Admin0	Month	WHOSEARO-ALL-2024-Y03-00	SEARO
INDONESIA	NA	NA	INDONESIA	IDN	1013696	IDN	NA	2016-05-01	2016-05-31	2016	19075	19075	Total	Admin0	Month	WHOSEARO-ALL-2024-Y03-00	SEARO
INDONESIA	NA	NA	INDONESIA	IDN	1013696	IDN	NA	2016-06-01	2016-06-30	2016	15183	15183	Total	Admin0	Month	WHOSEARO-ALL-2024-Y03-00	SEARO
INDONESIA	NA	NA	INDONESIA	IDN	1013696	IDN	NA	2016-07-01	2016-07-31	2016	12005	12005	Total	Admin0	Month	WHOSEARO-ALL-2024-Y03-00	SEARO
INDONESIA	NA	NA	INDONESIA	IDN	1013696	IDN	NA	2016-08-01	2016-08-31	2016	11342	11342	Total	Admin0	Month	WHOSEARO-ALL-2024-Y03-00	SEARO
INDONESIA	NA	NA	INDONESIA	IDN	1013696	IDN	NA	2016-09-01	2016-09-30	2016	9277	9277	Total	Admin0	Month	WHOSEARO-ALL-2024-Y03-00	SEARO
INDONESIA	NA	NA	INDONESIA	IDN	1013696	IDN	NA	2016-10-01	2016-10-31	2016	8855	8855	Total	Admin0	Month	WHOSEARO-ALL-2024-Y03-00	SEARO
INDONESIA	NA	NA	INDONESIA	IDN	1013696	IDN	NA	2016-11-01	2016-11-30	2016	8669	8669	Total	Admin0	Month	WHOSEARO-ALL-2024-Y03-00	SEARO
INDONESIA	NA	NA	INDONESIA	IDN	1013696	IDN	NA	2016-12-01	2016-12-31	2016	6733	6733	Total	Admin0	Month	WHOSEARO-ALL-2024-Y03-00	SEARO
INDONESIA	NA	NA	INDONESIA	IDN	1013696	IDN	NA	2017-01-01	2017-12-31	2017	68407	68407	Total	Admin0	Year	MOH-IDN-2017-Y01-12	SEARO
INDONESIA	NA	NA	INDONESIA	IDN	1013696	IDN	NA	2018-01-01	2018-12-31	2018	65600	65600	Total	Admin0	Year	LITERATURE-IDN-2018-Y01-00	SEARO
INDONESIA	NA	NA	INDONESIA	IDN	1013696	IDN	NA	2019-01-01	2019-01-31	2019	27445	27445	Total	Admin0	Month	WHOSEARO-ALL-2024-Y03-00	SEARO
INDONESIA	NA	NA	INDONESIA	IDN	1013696	IDN	NA	2019-02-01	2019-02-28	2019	24018	24018	Total	Admin0	Month	WHOSEARO-ALL-2024-Y03-00	SEARO
INDONESIA	NA	NA	INDONESIA	IDN	1013696	IDN	NA	2019-03-01	2019-03-31	2019	18110	18110	Total	Admin0	Month	WHOSEARO-ALL-2024-Y03-00	SEARO
INDONESIA	NA	NA	INDONESIA	IDN	1013696	IDN	NA	2019-04-01	2019-04-30	2019	13642	13642	Total	Admin0	Month	WHOSEARO-ALL-2024-Y03-00	SEARO
INDONESIA	NA	NA	INDONESIA	IDN	1013696	IDN	NA	2019-05-01	2019-05-31	2019	12556	12556	Total	Admin0	Month	WHOSEARO-ALL-2024-Y03-00	SEARO
INDONESIA	NA	NA	INDONESIA	IDN	1013696	IDN	NA	2019-06-01	2019-06-30	2019	9514	9514	Total	Admin0	Month	WHOSEARO-ALL-2024-Y03-00	SEARO
INDONESIA	NA	NA	INDONESIA	IDN	1013696	IDN	NA	2019-07-01	2019-07-31	2019	7738	7738	Total	Admin0	Month	WHOSEARO-ALL-2024-Y03-00	SEARO
INDONESIA	NA	NA	INDONESIA	IDN	1013696	IDN	NA	2019-08-01	2019-08-31	2019	5386	5386	Total	Admin0	Month	WHOSEARO-ALL-2024-Y03-00	SEARO
INDONESIA	NA	NA	INDONESIA	IDN	1013696	IDN	NA	2019-09-01	2019-09-30	2019	4154	4154	Total	Admin0	Month	WHOSEARO-ALL-2024-Y03-00	SEARO
INDONESIA	NA	NA	INDONESIA	IDN	1013696	IDN	NA	2019-10-01	2019-10-31	2019	4376	4376	Total	Admin0	Month	WHOSEARO-ALL-2024-Y03-00	SEARO
INDONESIA	NA	NA	INDONESIA	IDN	1013696	IDN	NA	2019-11-01	2019-11-30	2019	5425	5425	Total	Admin0	Month	WHOSEARO-ALL-2024-Y03-00	SEARO
INDONESIA	NA	NA	INDONESIA	IDN	1013696	IDN	NA	2019-12-01	2019-12-31	2019	5767	5767	Total	Admin0	Month	WHOSEARO-ALL-2024-Y03-00	SEARO
INDONESIA	NA	NA	INDONESIA	IDN	1013696	IDN	NA	2020-01-01	2020-01-31	2020	15950	15950	Total	Admin0	Month	WHOSEARO-ALL-2024-Y03-00	SEARO
INDONESIA	NA	NA	INDONESIA	IDN	1013696	IDN	NA	2020-02-01	2020-02-29	2020	19693	19693	Total	Admin0	Month	WHOSEARO-ALL-2024-Y03-00	SEARO
INDONESIA	NA	NA	INDONESIA	IDN	1013696	IDN	NA	2020-03-01	2020-03-31	2020	19366	19366	Total	Admin0	Month	WHOSEARO-ALL-2024-Y03-00	SEARO
INDONESIA	NA	NA	INDONESIA	IDN	1013696	IDN	NA	2020-04-01	2020-04-30	2020	13160	13160	Total	Admin0	Month	WHOSEARO-ALL-2024-Y03-00	SEARO
INDONESIA	NA	NA	INDONESIA	IDN	1013696	IDN	NA	2020-05-01	2020-05-31	2020	10725	10725	Total	Admin0	Month	WHOSEARO-ALL-2024-Y03-00	SEARO
INDONESIA	NA	NA	INDONESIA	IDN	1013696	IDN	NA	2020-06-01	2020-06-30	2020	8106	8106	Total	Admin0	Month	WHOSEARO-ALL-2024-Y03-00	SEARO
INDONESIA	NA	NA	INDONESIA	IDN	1013696	IDN	NA	2020-07-01	2020-07-31	2020	6329	6329	Total	Admin0	Month	WHOSEARO-ALL-2024-Y03-00	SEARO
INDONESIA	NA	NA	INDONESIA	IDN	1013696	IDN	NA	2020-08-01	2020-08-31	2020	3833	3833	Total	Admin0	Month	WHOSEARO-ALL-2024-Y03-00	SEARO
INDONESIA	NA	NA	INDONESIA	IDN	1013696	IDN	NA	2020-09-01	2020-09-30	2020	2743	2743	Total	Admin0	Month	WHOSEARO-ALL-2024-Y03-00	SEARO
INDONESIA	NA	NA	INDONESIA	IDN	1013696	IDN	NA	2020-10-01	2020-10-31	2020	2419	2419	Total	Admin0	Month	WHOSEARO-ALL-2024-Y03-00	SEARO
INDONESIA	NA	NA	INDONESIA	IDN	1013696	IDN	NA	2020-11-01	2020-11-30	2020	2963	2963	Total	Admin0	Month	WHOSEARO-ALL-2024-Y03-00	SEARO
INDONESIA	NA	NA	INDONESIA	IDN	1013696	IDN	NA	2020-12-01	2020-12-31	2020	3016	3016	Total	Admin0	Month	WHOSEARO-ALL-2024-Y03-00	SEARO
INDONESIA	NA	NA	INDONESIA	IDN	1013696	IDN	NA	2021-01-01	2021-01-31	2021	4567	4567	Total	Admin0	Month	WHOSEARO-ALL-2024-Y03-00	SEARO
INDONESIA	NA	NA	INDONESIA	IDN	1013696	IDN	NA	2021-02-01	2021-02-28	2021	4472	4472	Total	Admin0	Month	WHOSEARO-ALL-2024-Y03-00	SEARO
INDONESIA	NA	NA	INDONESIA	IDN	1013696	IDN	NA	2021-03-01	2021-03-31	2021	5712	5712	Total	Admin0	Month	WHOSEARO-ALL-2024-Y03-00	SEARO
INDONESIA	NA	NA	INDONESIA	IDN	1013696	IDN	NA	2021-04-01	2021-04-30	2021	6211	6211	Total	Admin0	Month	WHOSEARO-ALL-2024-Y03-00	SEARO
INDONESIA	NA	NA	INDONESIA	IDN	1013696	IDN	NA	2021-05-01	2021-05-31	2021	6677	6677	Total	Admin0	Month	WHOSEARO-ALL-2024-Y03-00	SEARO
INDONESIA	NA	NA	INDONESIA	IDN	1013696	IDN	NA	2021-06-01	2021-06-30	2021	5444	5444	Total	Admin0	Month	WHOSEARO-ALL-2024-Y03-00	SEARO
INDONESIA	NA	NA	INDONESIA	IDN	1013696	IDN	NA	2021-07-01	2021-07-31	2021	3422	3422	Total	Admin0	Month	WHOSEARO-ALL-2024-Y03-00	SEARO
INDONESIA	NA	NA	INDONESIA	IDN	1013696	IDN	NA	2021-08-01	2021-08-31	2021	3414	3414	Total	Admin0	Month	WHOSEARO-ALL-2024-Y03-00	SEARO
INDONESIA	NA	NA	INDONESIA	IDN	1013696	IDN	NA	2021-09-01	2021-09-30	2021	4057	4057	Total	Admin0	Month	WHOSEARO-ALL-2024-Y03-00	SEARO
INDONESIA	NA	NA	INDONESIA	IDN	1013696	IDN	NA	2021-10-01	2021-10-31	2021	6092	6092	Total	Admin0	Month	WHOSEARO-ALL-2024-Y03-00	SEARO
INDONESIA	NA	NA	INDONESIA	IDN	1013696	IDN	NA	2021-11-01	2021-11-30	2021	9899	9899	Total	Admin0	Month	WHOSEARO-ALL-2024-Y03-00	SEARO
INDONESIA	NA	NA	INDONESIA	IDN	1013696	IDN	NA	2021-12-01	2021-12-31	2021	13551	13551	Total	Admin0	Month	WHOSEARO-ALL-2024-Y03-00	SEARO
INDONESIA	NA	NA	INDONESIA	IDN	1013696	IDN	NA	2022-04-01	2022-04-30	2022	10664	10664	Total	Admin0	Month	WHOSEARO-ALL-2024-Y03-00	SEARO
INDONESIA	NA	NA	INDONESIA	IDN	1013696	IDN	NA	2022-05-01	2022-05-31	2022	12470	12470	Total	Admin0	Month	WHOSEARO-ALL-2024-Y03-00	SEARO
INDONESIA	NA	NA	INDONESIA	IDN	1013696	IDN	NA	2022-06-01	2022-06-30	2022	12762	12762	Total	Admin0	Month	WHOSEARO-ALL-2024-Y03-00	SEARO
INDONESIA	NA	NA	INDONESIA	IDN	1013696	IDN	NA	2022-07-01	2022-07-31	2022	13118	13118	Total	Admin0	Month	WHOSEARO-ALL-2024-Y03-00	SEARO
INDONESIA	NA	NA	INDONESIA	IDN	1013696	IDN	NA	2022-08-01	2022-08-31	2022	12348	12348	Total	Admin0	Month	WHOSEARO-ALL-2024-Y03-00	SEARO
INDONESIA	NA	NA	INDONESIA	IDN	1013696	IDN	NA	2022-09-01	2022-09-30	2022	10994	10994	Total	Admin0	Month	WHOSEARO-ALL-2024-Y03-00	SEARO
INDONESIA	NA	NA	INDONESIA	IDN	1013696	IDN	NA	2022-10-01	2022-10-31	2022	10135	10135	Total	Admin0	Month	WHOSEARO-ALL-2024-Y03-00	SEARO
INDONESIA	NA	NA	INDONESIA	IDN	1013696	IDN	NA	2022-11-01	2022-11-30	2022	9423	9423	Total	Admin0	Month	WHOSEARO-ALL-2024-Y03-00	SEARO
INDONESIA	NA	NA	INDONESIA	IDN	1013696	IDN	NA	2022-12-01	2022-12-31	2022	8935	8935	Total	Admin0	Month	WHOSEARO-ALL-2024-Y03-00	SEARO
INDONESIA	NA	NA	INDONESIA	IDN	1013696	IDN	NA	2022-03-01	2022-03-31	2022	10082	10082	Total	Admin0	Month	WHOSEARO-ALL-2024-Y03-00	SEARO
INDONESIA	NA	NA	INDONESIA	IDN	1013696	IDN	NA	2022-01-01	2022-01-31	2022	20486	20486	Total	Admin0	Month	WHOSEARO-ALL-2024-Y03-00	SEARO
INDONESIA	NA	NA	INDONESIA	IDN	1013696	IDN	NA	2022-02-01	2022-02-28	2022	11849	11849	Total	Admin0	Month	WHOSEARO-ALL-2024-Y03-00	SEARO
INDONESIA	NA	NA	INDONESIA	IDN	1013696	IDN	NA	2023-01-01	2023-01-31	2023	12611	12611	Total	Admin0	Month	WHOSEARO-ALL-2024-Y03-00	SEARO
INDONESIA	NA	NA	INDONESIA	IDN	1013696	IDN	NA	2023-02-01	2023-02-28	2023	10862	10862	Total	Admin0	Month	WHOSEARO-ALL-2024-Y03-00	SEARO
INDONESIA	NA	NA	INDONESIA	IDN	1013696	IDN	NA	2023-03-01	2023-03-31	2023	10220	10220	Total	Admin0	Month	WHOSEARO-ALL-2024-Y03-00	SEARO
INDONESIA	NA	NA	INDONESIA	IDN	1013696	IDN	NA	2023-04-01	2023-04-30	2023	8042	8042	Total	Admin0	Month	WHOSEARO-ALL-2024-Y03-00	SEARO
INDONESIA	NA	NA	INDONESIA	IDN	1013696	IDN	NA	2023-05-01	2023-05-31	2023	9447	9447	Total	Admin0	Month	WHOSEARO-ALL-2024-Y03-00	SEARO
INDONESIA	NA	NA	INDONESIA	IDN	1013696	IDN	NA	2023-06-01	2023-06-30	2023	8115	8115	Total	Admin0	Month	WHOSEARO-ALL-2024-Y03-00	SEARO
INDONESIA	NA	NA	INDONESIA	IDN	1013696	IDN	NA	2023-07-01	2023-07-31	2023	8052	8052	Total	Admin0	Month	WHOSEARO-ALL-2024-Y03-00	SEARO
INDONESIA	NA	NA	INDONESIA	IDN	1013696	IDN	NA	2023-08-01	2023-08-31	2023	8719	8719	Total	Admin0	Month	WHOSEARO-ALL-2024-Y03-00	SEARO
INDONESIA	NA	NA	INDONESIA	IDN	1013696	IDN	NA	2023-09-01	2023-09-30	2023	7946	7946	Total	Admin0	Month	WHOSEARO-ALL-2024-Y03-00	SEARO
INDONESIA	NA	NA	INDONESIA	IDN	1013696	IDN	NA	2023-10-01	2023-10-31	2023	8339	8339	Total	Admin0	Month	WHOSEARO-ALL-2024-Y03-00	SEARO
INDONESIA	NA	NA	INDONESIA	IDN	1013696	IDN	NA	2023-11-01	2023-11-30	2023	10082	10082	Total	Admin0	Month	WHOSEARO-ALL-2024-Y03-00	SEARO
INDONESIA	NA	NA	INDONESIA	IDN	1013696	IDN	NA	2023-12-01	2023-12-31	2023	12285	12285	Total	Admin0	Month	WHOSEARO-ALL-2024-Y03-00	SEARO

## Sheet: WHO_Dashboard_2024_2025
Country	Year_Month	Dengue_cases
INDONESIA	2024_01	27268
INDONESIA	2024_02	29411
INDONESIA	2024_03	32292
INDONESIA	2024_04	30123
INDONESIA	2024_05	32020
INDONESIA	2024_06	24098
INDONESIA	2024_07	19265
INDONESIA	2024_08	14563
INDONESIA	2024_09	11074
INDONESIA	2024_10	10970
INDONESIA	2024_11	11975
INDONESIA	2024_12	14212
INDONESIA	2025_01	22315
INDONESIA	2025_02	18830
INDONESIA	2025_03	14998
INDONESIA	2025_04	13956
INDONESIA	2025_05	15264
INDONESIA	2025_06	13620
INDONESIA	2025_07	13014
INDONESIA	2025_08	11366
INDONESIA	2025_09	10076
INDONESIA	2025_10	9398
INDONESIA	2025_11	7817
INDONESIA	2025_12	713

## Sheet: Source
All data up to 2023: Open Dengue
https://opendengue.org/
Downloaded 3 Feb 2026
2024 and 2025 Data: WHO Global Dengue dashboard
https://worldhealthorg.shinyapps.io/dengue_global/
Because the OpenDengue data is currently complete only to October 2024
Accessed 16 Feb 2026
