# Supplementary material
Source: Research Square preprint supplement (doi:10.21203/rs.3.rs-8953443/v1)
Supplement: Supplementary file 3 [file 900b9150d596dbdf96f104e4.xlsx]

## Sheet: Metadata
Variable	Description
Year	Year
Population_Yogya	Annual population of Yogyakarta City
DHF_Cases_Yogya	Cases of dengue haemorrhagic fever reported to the Yogyakarta District Health Office (ICD-10 code A91)
DF_Cases_Yogya	Cases of dengue fever reported to the Yogyakarta District Health Office (ICD-10 code A90); DF reporting commenced in 2017
DF_DHF_Cases_Yogya	Sum of DF and DHF cases reported to the Yogyakarta District Health Office
DHF_Incidence	Incidence of dengue haemorrhagic fever case notifications per 100,000 population
DF_DHF_Incidence	Incidence of dengue fever & dengue haemorrhagic fever case notifications per 100,000 population
3y_avg_inc_DHF	Three year moving average incidence of DHF case notifications per 100,000 population

## Sheet: Population data source
Year	Source	Web link
1990	Kota Yogyakarta Dalam Angka 2001	https://web-api.bps.go.id/download.php?f=J2Kfhzb1WVMCPoTYCvHmKjZpbW8zUVhCUW1FcG8rTWM3eEJ6RFpJaytKa2lZN2RnSFdPZVV5VHZzeDVCMHBRMEZRTXZlbk9DaVNKNE9qSGdNY0tTNy9PcGdXYzRidmJETnpFcnZMWUR1eUNyN3VJYmZ2MXpxRmd3QUZZUkFNTGRBeTdkVndKalpZd1FmZkFGalJpRHJvZG50eEprb2dPazdmRkV2bSsya3lKQ3FCaHhEZnpwTGUzeFN3b05HNVFpTnVseFlmRzBVb0hjaCtENUFNWDlxZ056OEhKTUxGc2ZXVzBjWHplNnF0ak5tcTFNTXRXM2UxbGwzUm5UM2NpSm9qcE82MmpBOGRBeU…
1995	Kota Yogyakarta Dalam Angka 2001	https://web-api.bps.go.id/download.php?f=J2Kfhzb1WVMCPoTYCvHmKjZpbW8zUVhCUW1FcG8rTWM3eEJ6RFpJaytKa2lZN2RnSFdPZVV5VHZzeDVCMHBRMEZRTXZlbk9DaVNKNE9qSGdNY0tTNy9PcGdXYzRidmJETnpFcnZMWUR1eUNyN3VJYmZ2MXpxRmd3QUZZUkFNTGRBeTdkVndKalpZd1FmZkFGalJpRHJvZG50eEprb2dPazdmRkV2bSsya3lKQ3FCaHhEZnpwTGUzeFN3b05HNVFpTnVseFlmRzBVb0hjaCtENUFNWDlxZ056OEhKTUxGc2ZXVzBjWHplNnF0ak5tcTFNTXRXM2UxbGwzUm5UM2NpSm9qcE82MmpBOGRBeU…
2000	Kota Yogyakarta Dalam Angka 2001	https://web-api.bps.go.id/download.php?f=J2Kfhzb1WVMCPoTYCvHmKjZpbW8zUVhCUW1FcG8rTWM3eEJ6RFpJaytKa2lZN2RnSFdPZVV5VHZzeDVCMHBRMEZRTXZlbk9DaVNKNE9qSGdNY0tTNy9PcGdXYzRidmJETnpFcnZMWUR1eUNyN3VJYmZ2MXpxRmd3QUZZUkFNTGRBeTdkVndKalpZd1FmZkFGalJpRHJvZG50eEprb2dPazdmRkV2bSsya3lKQ3FCaHhEZnpwTGUzeFN3b05HNVFpTnVseFlmRzBVb0hjaCtENUFNWDlxZ056OEhKTUxGc2ZXVzBjWHplNnF0ak5tcTFNTXRXM2UxbGwzUm5UM2NpSm9qcE82MmpBOGRBeU…
2001	Kota Yogyakarta Dalam Angka 2001	https://web-api.bps.go.id/download.php?f=J2Kfhzb1WVMCPoTYCvHmKjZpbW8zUVhCUW1FcG8rTWM3eEJ6RFpJaytKa2lZN2RnSFdPZVV5VHZzeDVCMHBRMEZRTXZlbk9DaVNKNE9qSGdNY0tTNy9PcGdXYzRidmJETnpFcnZMWUR1eUNyN3VJYmZ2MXpxRmd3QUZZUkFNTGRBeTdkVndKalpZd1FmZkFGalJpRHJvZG50eEprb2dPazdmRkV2bSsya3lKQ3FCaHhEZnpwTGUzeFN3b05HNVFpTnVseFlmRzBVb0hjaCtENUFNWDlxZ056OEhKTUxGc2ZXVzBjWHplNnF0ak5tcTFNTXRXM2UxbGwzUm5UM2NpSm9qcE82MmpBOGRBeU…
2002	Kota Yogyakarta Dalam Angka 2002	https://web-api.bps.go.id/download.php?f=RhSE4zjREqgfy7ipd6/MPXVkNi9Td3FDUEQ1dmErb1lQVVluSU5DSk5TaU5CM0RwN1p2T0d4dnBTUlVuL0tNMXRad0daMmd2UW5yRnVyQk5lUGRieVNkMFZuNGVOSlFPc2ZsYm9ROUVTdzFKUGZQTlZqT3pESnBEUXdpSk9hdGZveUFBcndTUVZnYzRIcDVBLzJOZ3hWUk5yOUkvdEsvREVpa2NwKzVWQ0hHYmVoTDdWa1VXaE4vT3RNMEtyWHBhbHY2Q0Job1grYWJNZVBBZVhpak94MVcvWXNCQ0lDZGo4QUFvL2g0N25IM2dPamxTc1B4TGFNUlRkNUNXU25XQnlPdUllQ1Y5Q2NUeE…
2003	Kota Yogyakarta Dalam Angka 2003	https://web-api.bps.go.id/download.php?f=H2LqI0qxhvxIwQA2RB2GbnZZS3JKUFpPQlgvN1BnVXhXZWtvTmF0bGFpdzBUaCt3MGIzMXd3c1JsTmxsRGVscWdwUnhqZDYybVVqZ091a0UrL1ducnhNYWQ1b3ZTdE9CSjltMjN4M3RyN0YzcVp2MjRzYWZwbHEzSHpncU4rRSs1OXV1REVmK2s4V2JmTlVITnFINTMwUkV4bERFL1NLN2l3VlNTY042elZaRlh0Tml6REI2SGxaRTF1cUd1QnM2UDgvU0wwZXRlUlFnL0tSbm5tT0Fkb2pwR0VPVU43eHMzU3lXaEpBQ2s4UHdDd20vMkRqUm5MbWxzd1pvcjRRTTdDVEpjaU1uZmdod3…
2004	Kota Yogyakarta Dalam Angka 2004	https://web-api.bps.go.id/download.php?f=Q1MAxIG4nPk5jfphWPljXUhpeXBFdUpwUDB5bEY3SGJNakl6eXhlZnZnSjlzaysxbXdOMnlWVmxhYW9OaXN2Ukt6SnB1U0RHSjRoZjUrZW83Z2VyWDNQbFBseGVOeUpGSThGVzN5b2xrRjRkS1RhMVROZ3VVZU15R3hmb3poTkM5bi9tZXNLbXBQL29NcHRNYTBkdzNSajBIc2FuMXBYdlhGcXBrRnFmYU9GeHhkbTViQmVndGNma0RKdmZMUTMwdldxV1MyZG5GaE9SL0pBQXJLYU8zUmVPZHBMR1RXRTgvc1pqYWVLZXhzUzRRU2kza09POFlVb1htRC9uYytJejRKaVp3bjVKbjQyQm…
2005	Kota Yogyakarta Dalam Angka 2005	https://web-api.bps.go.id/download.php?f=Bju6nQcXhbWuJWrg9qZWfFpzdFczNXRtQUVmREFUM3Z3THRwYTlNenFNeVBMR28ybzJ6TFBFNEFWOWNYUC9BYXNaQ3NwSjMxUFZxUHJYU281cGtkbzVHcldOTm5ucU1zTmNnMlE1M1hqQTF5SHRscnBGcEpsUG51eFJJMWdIV1d4VGxNQjRla25ROFpyUjBFL3BpOGlHZWlpMkM5OEMyRUZSM1Z0aFJOUTJ5Nm9QWUhKRHRrNzNmcE5wSkRjTHVPMmV6dTZydCt0STRhSm5ZNmkvWTNQakt5ZndBU2xLRnVEVGdqOVZHaUtqWW4wM1BWaXhQK09RUXZGRExpVFFtS0FMdXNRWkFJZUw3YX…
2006	Kota Yogyakarta Dalam Angka 2006/2007	https://web-api.bps.go.id/download.php?f=ZC6sSA+U69agI1lkHbV/mWd3Uk9SQml6Smd3cnFoYThLaDV4RWc4UXB0WGxETE9wQXI2Q1g2dkZMcHFNVVFNQ1BuSGNUdmJ1RmFFcExkV3dQRUhKS3JTZEFPY3l3dGdZUXJpRGNwQ1VCbXEvcmJjK1h1RDhtdDBpRWVsOWRXWnB2cFNsVDc0REZ1WkZBMjBZOTBJaXlYK2VOK0tKeSt0N2J5RG50OTdIeTJnSCtCdXZTb0tWLzFtNG5WNXpOUGtBRzY0KzNOL3hreTFtNG43MGVXM05uWlYxaXUwa2V2RzJkcG1FT2wwRzZ0ZGwyOGszRnlibVZ3QktxdnRrUmlFTVR4VXQ5TU1BT2txTV…
2007	Kota Yogyakarta Dalam Angka 2008	https://web-api.bps.go.id/download.php?f=fu8e8azWWFJXv8fl779xXngwYU5YbElGR0tpL0FLN3FZcEtQWVlHZWdJaE5UYk9uei9HdDR2d1hsdHF1RjQ0ZERuaDlvblorbEUzQjh2bVJIRHVaN2RITk51bjEwR09mUnd2eXI0Wk4xbTA1ZkZ6WU9nb3VtS0Zmb3VNUDZoUFVDaWJqdjljRjNKMVlKYU9RQ2JJNDRDYm5PdktuZjFpR0dSL1RGdEpCMWt3TkJBSFYrTmE2bmcxNDlzRjFDcXhpZy8reDJnRzdBakNhWllVeC9BUVJKYWZEaDJVM1RDUFhka2FhWHJIYlQrejI5eUxRRXE4bjVtVFJWUVNJc2xFaDhWeXoyYkZld2htRD…
2008	Kota Yogyakarta Dalam Angka 2009	https://web-api.bps.go.id/download.php?f=83ijyrq7tUlAOWCNsuXh31hzbUhROElSQmdQRFdhWjYyeGJyNW1wMGNOYjdCeHdGQ1BFQzc4aTIxdFFpWWVpQTVzNGNpb0R0Y0hGd3R0VmVrMkI5NmtUOWJYcm9aZmdyNTM3NDRzRnNqYUtNY1pPK0ZaZkdaZ0pNTklHSEJvdG5KV0x2aGV1N0RsZ25HM1h4NXppR3ByYnJndEUvQS9sMjRtSklkNFIwRmdKS0kzV05zRTVScXVHYzIzQzRKNjA5cTc5dHlhRkhjeWFhaDhUWklscytsTy83OWRscWdTcUovQ0xOODVJcDBhYVVyWDYxY3o4K2phUHdzcmVZZ3Q3K1JyZ05JUE5ST2FhR0…
2009	Kota Yogyakarta Dalam Angka 2010	https://web-api.bps.go.id/download.php?f=pbgzz/R4VagzsmwzUHAx03lKRWJTQklSUllUdWp4cVMxSXV4c0t5bDVGRkJVM2RkMS93WUJaNXlXTnRhSDZFT3piQ3N1Ym5penQ5SnRlandnc2s0NEhlUzcwNERYOGo2c0s0WUtpQTVSTjBjNW93d04xaXlDZlJxNUFYQVFSVVJIUjFzbGxtRWVNUXQrU1h2d2ZhQkxlYmo0bTNpS2k3MU51WHlqUlN0eXpNTS96QTgzcEtjcE5veFIvYVRmWTI1SUtGZ2FUbG9MbkNpRXNrb3kyREdYQWU2TWovbzU1Y3EvNlU4OWhSQ2dZZGp3dmJpaEV6VW5RMWxNNHJORjRicW5uYXRYTG5WODVoc2…
2010	Kota Yogyakarta dalam Angka 2011	https://web-api.bps.go.id/download.php?f=3HvxvpY2TYXr8wEbjYjtdm1XNWxUbFJjK3A3K3JoRUtjVGpGdDdlRzZieHlncmg4c0xWVFZsdXZiblNkRXhKbXNhMXNBVThRcDYwRE1VU2xPc0NYbldERXlKVFc3L1diRkV4OW5HS1o5QmNNNStIRkV4TGRrdFozamtQK1dONjBGRURHcFVxMTJVWEs2dk16bTRJRkJyaWVsZGRVQ0U4emhnWXRWTkx3Q04yc25uMURoM3JzSWIreGE4cE1qTUlCWi9xSVhxbkF0NjV3V0oxVFBUK3FVR2QxcDNRRCtkektUOUQrVFFvc2R6YmNkMjlicTViMUN0UDBaYllZK1ZLNzBvLzVqRWtzOEVUSk…
2011	Kota Yogyakarta Dalam Angka 2012	https://web-api.bps.go.id/download.php?f=gnabjb1rN0o4fKQDZY1XGHJ0VWpnU1diVzMzcjRVN2o1eThJUlFXd251REYrc1g2Z3IwcFVEbmh6QzJYT2ZhYzE0MEtjNDB1bzN2K1pQSm9KS2dVT3g0Y3hOSHdkcGhwNHRDRkkwZzdObWdZZ2JiSDBOR0JVQmVkUmNNdGdXR3FQTXY1amtiMGJGOEZvKzNuMHR1UmFia0F2aGNUZWJ5eVJsMGZnRXMzU0RXTmhRUmRMRTNJRUVQNm0wZENzTnRCYWJNbllzQncySVgwa0t0UW54ME4vMHdHdUJHK05VSGhTSk0wSHBTNlEyQm9TdVcrTmtneEwzYlNCYkZ2dzNTaWtXMzhQcEd6bzhBVE…
2012	Kota Yogyakarta dalam Angka 2013	https://web-api.bps.go.id/download.php?f=PTWGkYN97tqSFuPaMeErGVJ6akwyNmNYSFFaYmgrN24yUGdLWVE3TDIwaTFjZ2czT1IrM25vZ1RnaU8vODRONTlBWG1va2MzSXM4cFJxZXhDYmtPcTZMa0p0amtUSzdWbno2WHA1M2J4YlBvTzZTWFYydVN4QUtRNkFxRnVLS3dqRWdRWmpncmJSRkZvemxLRWR5YmtQOG1Nc1Erdzk1WHpMOCtNRzBPN2o1aG5UWkpZV2RuN29OVDRCWVU1RlNiWVNnd3Y0dmhhY1FVQkFaY1daUVpEZTlqWGlmWTg0WnlMZUFZaVg4RWZyN1ZuT0Izd2EraVRvbzJQak5ua0NleThBVDg2SURTZ2JMTE…
2013	Kota Yogyakarta dalam Angka 2014	https://web-api.bps.go.id/download.php?f=x44CIl8FrOG78s6HskK3hGV0Rk1ORVZPTzdBRmwzRUNCQm9mRjZ0eUtSTVRGdWVMZnRxc0x1SFFMb3Jscm51L0VKZUxOMktPQlVheGpxS3ROVldlWGFhQ2xBeFNDdVQ2S1BLVHRCamIrQ1BSME9vbEYxaFU4YUwrQ3FBN0xoVW9tQm5ZalZkRExTclNObVNPYkEwR3RpZ1Z3cmJCbmJXV0VuTHMxMFVpaGFLZm1JVUdER1RkWWtEZU41ZDZ2Q2VuT09vMGYwMVZZNnJabnppVzZNMEp0SGxIbkRtclVwckFPODl0aHI0UEVSeitNVk9BTjQ1MXpnKytNcWFaS2JsaU1NMFo2YVFUOGIyUm…
2014	Kota Yogyakarta dalam Angka 2015	https://web-api.bps.go.id/download.php?f=DLIDgZwMizHDRL3iIrt4x1JnY3B6R3ptWnc5RVJvVVJTMHNDQm5aejdKZVRSR01JQmQzb3hoR2ZYbU8za2VqWDVVNHB2L0dtdjJkUmhhcjNkcVA0cyt2a3I1SHZwcUhkQXZrODZlZE8ydys1Vjk5M1dwVzJKTURnUjFwNjBxY1NYYUU4d3VYYVU3WDhPRXJqWldrZFhQY2cybVlPODV2eFkvK1pPeUkxcS80Ynd5WjZXYUZ5elA0THNBWVNkWHdjd3h2QjNmRlowNmFSTU9ja0FONUhXWW52RzFsdTZtbUhLR3Y4cFNTMjFISW5HRUE4c0tWK2YvVVBWSDQ2V3o3MDNYeDR6L1Bta0p2a2…
2015	Kota Yogyakarta dalam Angka 2016	https://web-api.bps.go.id/download.php?f=pBCLU2PMMIM6zZ+3ZqiLYHhkd1JLMU5SdElMd1hDN0JjOThZancxN1YwV0orQ0diZmxtd1EvYnBYb045NEtvdjVIdHluVUVLbzBpOXlESGxIMlJVbDl5RlV4V1RLQ1UyMFk0RUgrR0NFOVZKU0daWlNuV1RWSUxMN0Y1SGgzRGN3WG9PL3lmU2ZHcEVzVExSTU0yR3hnMnBGM21ubnVuai9DU3daTGFMTUVRa05KSytRWm85T0hWYmZta0ZudmZaK2Nma0JEZ0VkYUVoaDkyMjM0SjZiaVRXNjZWTFkxZGttUUpUWlFpalFlRTFUZXFWbTQ2UE1zcWY2Z2RhT1cyOUhUUnhZQlJQVXhHT1…
2016	Kota Yogyakarta dalam Angka 2017	https://web-api.bps.go.id/download.php?f=duxRUpr2UPjpatM93+eE0W9kL3pDTVQwemQrVzVyRXNoRFI2SVd1amNQVmprcjZWYmJvbjZlVGVPQXNnVkkvaExEMVE0WnZ3NW40WW9RSzEyS3pCazFRTXdHcUtGbnh4eUU2NnRpZGxna0duK2NSTFJwU05Fa1hqSkFOcVZ4TXh5bDQ4MWFXa1g1aml3S2J6TUhnMkN3ZXBySmd5a3AvS3FOcTgrbjMzS2Y0YUx1dlZGK1lJSkVqakRGOGlKbUhGbEd1NncvZ0Rwc1hMWWZLRVhOQUhLdDhHMDRkb2RIY1JoRG9SNlBQODlKRk5xc1NXcHNuV3ptMHhNcnRiL2JuRmo0dncxb0VjbTlJUm…
2017	Kota Yogyakarta dalam Angka 2018	https://web-api.bps.go.id/download.php?f=zrqJEK2tWKK2GnP8UXdFgS9MTXlYalhGVDNBNFdkYkxoQW1FRGs3YzQzcGUrQ1d3V096Z1NSYy9kaDc5eHhzdDdPK3lMS2FLOXpJVUxTa1Bvc2htM0JJZXBNOHdBS2hFV0ZNTWI1RStIVGhHeFRBcVk3cExTSEd1LzRPbGtUQmx6aFRiN3lLT1J3YVI4a3pOVTVWUk05d3IvR3FPa3ZkcmtCUkpJNFlFVTNONXYvMk5KSFAwUkp5ZVNaQkI3cGszVjB5UFA1YTN6QVdCTzc5Rk5QN3Z6QjBlYlpsenMrKzBUdVcxT3k2WkJlaEJlQjhqR1lJa0VNV2JqRzE2NTlxbDZmYXZBMERHV0E0dG…
2018	Kota Yogyakarta dalam Angka 2019	https://web-api.bps.go.id/download.php?f=i0ILrFAmdlGhao4PomylGm5xTG1sZFpESm8xWW9vRmpVaW0vM1NZVXFPWEZDb3NMQmhJYk1sOFUrZUVvWWtDT3EzZ00xSkxSb3labjIvTDREK0plRHdlenMyLzJZTm83RlEyYUdLZWZLTk5RazE5ZlNMMnBZUSt4UFBtUHVVMlZVNHRpdXd2cHFmZ3NVeEJnaUVjRXhkRzBDUlorTHJ3SUg0aU1TYTBrVDhlL2F4aDZWODJZZkFvbCs1cURpcWYxSWFsL0RWNFRoUW1Qc1o5ZjEvWGVPSWxOcExFaS9xY1lRT25lWmZMbnJWOThyeGc4d2JBdFR5eDgySHpIbHdPdGZHL2NpL3BDNXM0Y1…
2019	Kota Yogyakarta dalam Angka 2020	https://web-api.bps.go.id/download.php?f=65LhbXNfLSqO1uTKp78VTFZaeU1YcEhUamlmTDJWQ3d4MnFKd1p2ZVR1S0E2bVRqc0JDSTMzRWVGY2VhaUZEQjI4b29LaEh4N1dUbGdMeXluVng2UjRhbXFLK0hnNGpUcjFoSU9pQllMYTRTbGxrdzVaWjBUTDV5aDNhak1EQUVVdHlBMm5uZjJJN0NVaGlBNllSSDNYZXl0a29rb2Q0enJXTU1GUVc1M0hJdmhTNzFNdyt6MWJ3c3ltSE9zaml4NFV4L2sxYmJ0U0NISm51MTBoMnZzY2RZNlRBUGkvaXhoZnFzZ3JrenU5azlyQTNLRjF2R3VPekNBSlYxRVMzZTR5TU9BODlHMTlMeU…
2020	Kota Yogyakarta dalam Angka 2021	https://web-api.bps.go.id/download.php?f=P/kgrYh+P/o6uHjIL0EWBnZ0L1dFNUpoR3grd3k2SDRJZVdFTWxibStYUXZSRXRwNkVIanh2MGRMWUNMMFhPUnJsak04ZXBvZTJycGNVKzRhR3ZmSWhnZ1JnbnBxSEdEcUZ6VU9TUFAwRHBVUXVHVmZ2cndOd3UvbzlZUGUybkV4T2xoMHBnM1ZQMUQyb254OFlMQ0RQVFZFY1lmQ3g2bXEycVhSdklua09QSW5DSVdybS9hYTlZakJZZ1V1djFLbkNOWkdLMTNuQXJCbC9rTzZuOE8yL1NLNnc3TkF2dmZYZEJ0ajJMTWE2dnhaRUN0VjlVK0dpM3ZaWjVObGkxNzRMdnVjMnUwUHlCKz…
2021	Kota Yogyakarta Dalam Angka 2022	https://web-api.bps.go.id/download.php?f=Sm055qd3gafE6RlwAQIG/m9zZGthZk50bTJtdWcrMXNOVE9hZEhUd2luM09NMHVqcVc0TUJ0Z2Q5azl0MzQ1dzBaV0Y2SjM4VEljTExTT3hQSjdPT3ZpeHFKcFJycUhEUzBucDB1djJoVVZ0Zis0b2NkektmUDJ6N1pDSTcvY3ZNbENqYllvTEhFT1hIdUkrdW5oRnRuUUpIZW5zRGZseG1zaTZwK3doT0U5amdiSzk5RHBiaGFWYmg2YWtVOVdnbC9uS1czR1ZTQzloT0VPbmJTSXJpS3Y2Um9YREZEMHpURTh5Y1lVNkNDZ0tGaUdLNVI1dUoxTlJORFRuRThFb1lJZEZSYUZHYkNVMV…
2022	Kota Yogyakarta Dalam Angka 2023	https://web-api.bps.go.id/download.php?f=wAmEACAaDnPN2Qg4EhreR01tWkY5UElwTzZ2UGpjenBUNURld0RtbGRFbUlmc0tPVVZtanJCLzVmQkpOMVNZLzRCMnY0c0FQWGZFemhDUU85OFo1UGRFNGMrbFJueG5VUm5nZjFuVlZYb0szZWZCMVJXSStPL091ZVZxQ2JwSTdTR2tpaUEvZStJMmJsdytHTThLSkI3V1NTNjBobHNZRnBCQUphMmJmcUtZZU9Nb0NscXVzcmNQVlhrZFZFVXE2WHM2S2xMQjVOcHNjL3N1bElBTFp2dHdnWFVOWjVjRHo3VWc3b21zRFhNRFZXL1pVdkhadk10T0Z5dXdIdVVHa05xdHBwbzRUYS95SE…
2023	Kota Yogyakarta Dalam Angka 2024	https://web-api.bps.go.id/download.php?f=C1TFdlnNfwarnI6kZ48/5XNINEJEQUxlOTRRS2YxbGQ5VE5qVGxvd3pvaFd2TGVuQUFITXFsd1hoR2ovVUVUajBzWnY3WmFYdWQrR0lOK1JsY0c5WGl6WS9qSWU1Q0J4b1orV09UNER2NU5ybFpFNGFjU2Z0OURvZ0ZaVjhBRzhleDVmYmkzU2tWcjJFbUhaR3VBN0U3US9MdXlpVjdEWFVlMUdyMFU4S0JId0ZoVjdLUDVXWE5BZVV1Yi90WUtQUWhlNzY1aGppZXRSR2JrNlNaVTNIZWFhNWhLZnk0a0NTc3RESVJoUGRKbnppcXZNbXA2VGk5YkJVdEM5RjF6cE5oMmh2WEl6Rzh4UD…
2024	Kota Yogyakarta Dalam Angka 2025	https://web-api.bps.go.id/download.php?f=DK+PeUYqtwDg+oblkyHMVmZxWFRCa1h2SjY1YkNDN1lrd2pNZlB0TFFRSkNhWktndDhGWTZNVWtxVm5GZ2J5dHVzU3RSR1hXWDAxZHZIUnMxbVd4aXJxUlVUVVBHeCtEUFRLcmE2SjZqL0ZRbktQcElvUjRObGRydzErTld5Q25jK2habFdYOElUb2p1cXdJVUxSdGtQZjEvSkpCVHA5Y2lJL25idVlEcEJOdzNuWThjZXU1MVc2Q2duT0hRYWFiazU5QWF3NGZuN1J6ajVmQXo4R2JPVnYweGRydmdtaEEyRGZwNFFiV1RRWFBBYm9iREF4K2djS29hcHVRK29wcUtadC9UM2xQSjZMZj…

## Sheet: Notified Dengue_Yogyakarta City
Year	Population_Yogya	DHF_Cases_Yogya	DF_Cases_Yogya	DF_DHF_Cases_Yogya	DHF_Incidence	DF_DHF_Incidence	3y_avg_inc_DHF
1990	412059	206			49.9928
1991	412059	367			89.0649
1992	412059	189			45.8672		61.6417
1993	412059	233			56.5453		63.8258
1994	412059	268			65.0392		55.8172
1995	418944	339			80.9177		67.5008
1996	418944	485			115.767		87.2414
1997	418944	550			131.282		109.322
1998	418944	1638			390.983		212.678
1999	418944	276			65.8799		196.048
2000	397398	567			142.678		199.847
2001	503954	607			120.448		109.669
2002	510914	374			73.2021		112.109
2003	392239	503			128.238		107.296
2004	398004	705			177.134		126.191
2005	435236	343			78.8078		128.06
2006	443112	897			202.432		152.791
2007	451118	771			170.909		150.716
2008	456915	763			166.989		180.11
2009	462752	689			148.892		162.263
2010	388627	1516			390.091		235.324
2011	390554	461			118.037		219.007
2012	394012	360			91.3678		199.832
2013	402679	906			224.993		144.799
2014	400467	407			101.631		139.331
2015	412704	943			228.493		185.039
2016	417744	1705			408.145		246.09
2017	422732	414	227	641	97.9344	151.633	244.857
2018	427498	113	129	242	26.4329	56.6085	177.504
2019	414055	478	327	805	115.444	194.419	79.937
2020	373589	297	190	487	79.4991	130.357	73.7919
2021	376324	81	49	130	21.524	34.5447	72.1556
2022	378913	172	99	271	45.393	71.5204	48.8054
2023	375699	82	82	164	21.826	43.652	29.581
2024	415605	282	277	559	67.8529	134.503	45.024
2025	415605	267	212	473	64.2437	113.81	51.3075
