# Supplementary material
Source: Research Square preprint supplement (doi:10.21203/rs.3.rs-8953443/v1)
Supplement: Supplementary file 4 [file ac31ba71490532c3f19e9b2a.xlsx]

## Sheet: Metadata
Variable	Description
year_month	Calendar month
fogging_untreated	Fogging events in not-yet-treated areas
fogging_treated	Fogging events in Wolbachia-treated areas
fogging_total	Total fogging events
dhf_inc	Incidence of DHF case notifications per 100,000 population
pop_covered	Cumulative residential population of Wolbachia-treated areas

## Sheet: FoggingData
year_month	fogging_untreated	fogging_treated	fogging_total	dhf_inc	pop_covered
2016_01	16	0	16	22.8463	0
2016_02	43	0	43	26.1834	0
2016_03	27	0	27	33.8844	0
2016_04	30	0	30	31.0607	0
2016_05	27	0	27	50.0565	0
2016_06	29	0	29	52.1101	0
2016_07	20	0	20	32.8576	0
2016_08	26	0	26	45.6926	0
2016_09	32	0	32	40.8153	0
2016_10	19	0	19	29.7772	0
2016_11	32	0	32	40.8153	0
2016_12	8	0	8	31.5741	0
2017_01	24	0	24	38.6563	0
2017_02	21	0	21	17.2616	0
2017_03	14	0	14	13.1286	13041
2017_04	3	0	3	10.6973	64599
2017_05	2	1	3	5.34867	64599
2017_06	1	0	1	3.64682	64599
2017_07	1	0	1	1.94497	64599
2017_08				1.45873	64599
2017_09				0.729364	64599
2017_10				3.64682	73518
2017_11				2.18809	92884
2017_12	0	1	1	1.94497	135722
2018_01	0	5	5	1.70185	142559
2018_02	0	1	1	1.45873	142559
2018_03	2	0	2	1.94497	142559
2018_04	0	1	1	2.43121	142559
2018_05	5	0	5	4.86243	142559
2018_06	0	1	1	2.43121	142559
2018_07	2	0	2	1.45873	142559
2018_08	3	0	3	0.729364	142559
2018_09				1.21561	142559
2018_10				3.16058	142559
2018_11				1.94497	142559
2018_12	0	1	1	4.13307	142559
2019_01	3	0	3	16.7754	142559
2019_02	11	1	12	13.6148	142559
2019_03	12	6	18	14.8304	142559
2019_04	7	2	9	18.4772	142559
2019_05	16	6	22	23.3397	142559
2019_06	4	0	4	11.4267	142559
2019_07	1	1	2	4.61931	142559
2019_08	1	0	1	2.67434	142559
2019_09				2.91746	142559
2019_10				2.91746	142559
2019_11	1	0	1	2.43121	142559
2019_12				2.18809	142559
2020_01	4	0	4	8.26613	142559
2020_02	5	3	8	17.5047	142559
2020_03	7	2	9	14.101	142559
2020_04	3	3	6	12.1561	142559
2020_05	7	2	9	6.8074	142559
2020_06	2	2	4	2.67434	142559
2020_07	0	1	1	1.94497	142559
2020_08	2	0	2	1.70185	142559
2020_09				1.70185	142559
2020_10				1.45873	142559
2020_11				2.43121	142559
2020_12				1.45873	142559
2021_01				1.21561	319894
2021_02	0	1	1	2.18809	411317
2021_03				0.972486	411317
2021_04				1.94497	411317
2021_05				2.43121	411317
2021_06				0.972486	411317
2021_07				0.972486	411317
2021_08				0.729364	411317
2021_09				0.729364	411317
2021_10				0.729364	411317
2021_11	0	1	1	4.13307	411317
2021_12				2.67434	411317
2022_01	0	5	5	9.96798	411317
2022_02	0	4	4	2.18809	411317
2022_03	0	4	4	2.43121	411317
2022_04	0	2	2	2.18809	411317
2022_05	0	3	3	5.34867	411317
2022_06	0	7	7	1.45873	411317
2022_07				3.16058	411317
2022_08	0	1	1	4.86243	411317
2022_09				2.91746	411317
2022_10	0	2	2	2.18809	411317
2022_11	0	1	1	1.94497	411317
2022_12				3.16058	411317
2023_01	0	3	3	2.67434	411317
2023_02				0.972486	411317
2023_03				1.94497	411317
2023_04				1.45873	411317
2023_05	0	1	1	1.94497	411317
2023_06				0.486243	411317
2023_07				0.243121	411317
2023_08				1.70185	411317
2023_09				1.94497	411317
2023_10				2.91746	411317
2023_11	0	1	1	2.18809	411317
2023_12	0	1	1	1.45873	411317
2024_01				2.43121	411317
2024_02	0	3	3	5.10555	411317
2024_03	0	9	9	8.26613	411317
2024_04	0	8	8	9.96798	411317
2024_05	0	6	6	8.75237	411317
2024_06	0	7	7	8.26613	411317
2024_07	0	2	2	4.61931	411317
2024_08	0	1	1	2.18809	411317
2024_09	0	1	1	3.16058	411317
2024_10				1.21561	411317
2024_11	0	4	4	5.34867	411317
2024_12	0	4	4	9.23862	411317
2025_01	0	8	8	13.8579	411317
2025_02	0	1	1	11.4267	411317
2025_03	0	3	3	5.59179	411317
2025_04	0	1	1	4.37619	411317
2025_05					411317
2025_06					411317
2025_07					411317
