# Supplementary material
Source: Research Square preprint supplement (doi:10.21203/rs.3.rs-8953443/v1)
Supplement: Supplementary file 5 [file b993869cca544ba724fd8cdb.xlsx]

## Sheet: Metadata
Data sheet	Variable	Description
2016_2022_Kelurahan	Kelurahan	The kelurahan (urban village) in which mosquito collections were done
2016_2022_Kelurahan	Kecematan	The kecematan (sub-district) in which mosquito collections were done
2016_2022_Kelurahan	Aegypti tested	The number of collected Aedes aegypti that were screened for the presence of wMel Wolbachia in a given area and month
2016_2022_Kelurahan	wMel pos	The number of screened Aedes aegypti in which wMel Wolbachia was detected by qPCR
2016_2022_Kelurahan	wmel %	The percentage of screened Aedes aegypti in which wMel Wolbachia was detected by qPCR
2023_2024_Kecematan	Kecematan	The kecematan (sub-district) in which mosquito collections were done (December 2023 and November 2024)
2023_2024_Kecematan	Aegypti tested_2023	The number of collected Aedes aegypti that were screened for the presence of wMel Wolbachia in a given area in the Dec 2023 monitoring round
2023_2024_Kecematan	wMel pos_2023	The number of screened Aedes aegypti in which wMel Wolbachia was detected by qPCR in the Dec 2023 monitoring round
2023_2024_Kecematan	wMel %_2023	The percentage of screened Aedes aegypti in which wMel Wolbachia was detected by qPCR in the Dec 2023 monitoring round
2023_2024_Kecematan	Aegypti tested_2024	The number of collected Aedes aegypti that were screened for the presence of wMel Wolbachia in a given area in the Nov 2024 monitoring round
2023_2024_Kecematan	wMel pos_2024	The number of screened Aedes aegypti in which wMel Wolbachia was detected by qPCR in the Nov 2024 monitoring round
2023_2024_Kecematan	wMel %_2024	The percentage of screened Aedes aegypti in which wMel Wolbachia was detected by qPCR in the Nov 2024 monitoring round

## Sheet: 2016_2022_Kelurahan
Kelurahan	Kecematan	Year_month	Aegypti tested	wMel pos	wMel %
Baciro	Gondokusuman	2016_09	0	0
Bausasran	Danurejan	2016_09	0	0
Bener	Tegalrejo	2016_09	209	22	10.5263
Brontokusuman	Mergangsan	2016_09	0	0
Bumijo	Jetis	2016_09	0	0
Cokrodiningratan	Jetis	2016_09	0	0
Demangan	Gondokusuman	2016_09	0	0
Gedongkiwo	Mantrijeron	2016_09	0	0
Giwangan	Umbulharjo	2016_09	0	0
Gowongan	Jetis	2016_09	0	0
Gunung Ketur	Pakualaman	2016_09	0	0
Kadipaten	Kraton	2016_09	0	0
Karangwaru	Tegalrejo	2016_09	134	10	7.46269
Keparakan	Mergangsan	2016_09	0	0
Klitren	Gondokusuman	2016_09	0	0
Kotabaru	Gondokusuman	2016_09	0	0
Kricak	Tegalrejo	2016_09	628	73	11.6242
Mantrijeron	Mantrijeron	2016_09	0	0
Muja Muju	Umbulharjo	2016_09	0	0
Ngampilan	Ngampilan	2016_09	0	0
Ngupasan	Gondomanan	2016_09	0	0
Notoprajan	Ngampilan	2016_09	0	0
Pakuncen	Wirobrajan	2016_09	868	62	7.14286
Pandeyan	Umbulharjo	2016_09	0	0
Panembahan	Kraton	2016_09	0	0
Patangpuluhan	Wirobrajan	2016_09	172	24	13.9535
Patehan	Kraton	2016_09	0	0
Prawirodirjan	Gondomanan	2016_09	0	0
Prenggan	Kotagede	2016_09	0	0
Pringgokusuman	Gedong Tengen	2016_09	0	0
Purbayan	Kotagede	2016_09	0	0
Purwokinanti	Pakualaman	2016_09	0	0
Rejowinangun	Kotagede	2016_09	0	0
Semaki	Umbulharjo	2016_09	0	0
Sorosutan	Umbulharjo	2016_09	0	0
Sosromenduran	Gedong Tengen	2016_09	0	0
Suryodiningratan	Mantrijeron	2016_09	0	0
Tahunan	Umbulharjo	2016_09	0	0
Tegal Panggung	Danurejan	2016_09	0	0
Tegalrejo	Tegalrejo	2016_09	175	20	11.4286
Terban	Gondokusuman	2016_09	0	0
Warungboto	Umbulharjo	2016_09	0	0
Wirobrajan	Wirobrajan	2016_09	146	7	4.79452
Wirogunan	Mergangsan	2016_09	0	0
Baciro	Gondokusuman	2016_10	0	0
Bausasran	Danurejan	2016_10	0	0
Bener	Tegalrejo	2016_10	364	93	25.5494
Brontokusuman	Mergangsan	2016_10	0	0
Bumijo	Jetis	2016_10	0	0
Cokrodiningratan	Jetis	2016_10	0	0
Demangan	Gondokusuman	2016_10	0	0
Gedongkiwo	Mantrijeron	2016_10	0	0
Giwangan	Umbulharjo	2016_10	0	0
Gowongan	Jetis	2016_10	0	0
Gunung Ketur	Pakualaman	2016_10	0	0
Kadipaten	Kraton	2016_10	0	0
Karangwaru	Tegalrejo	2016_10	494	75	15.1822
Keparakan	Mergangsan	2016_10	0	0
Klitren	Gondokusuman	2016_10	0	0
Kotabaru	Gondokusuman	2016_10	0	0
Kricak	Tegalrejo	2016_10	816	158	19.3627
Mantrijeron	Mantrijeron	2016_10	0	0
Muja Muju	Umbulharjo	2016_10	0	0
Ngampilan	Ngampilan	2016_10	0	0
Ngupasan	Gondomanan	2016_10	0	0
Notoprajan	Ngampilan	2016_10	0	0
Pakuncen	Wirobrajan	2016_10	913	104	11.391
Pandeyan	Umbulharjo	2016_10	0	0
Panembahan	Kraton	2016_10	0	0
Patangpuluhan	Wirobrajan	2016_10	443	99	22.3476
Patehan	Kraton	2016_10	0	0
Prawirodirjan	Gondomanan	2016_10	0	0
Prenggan	Kotagede	2016_10	0	0
Pringgokusuman	Gedong Tengen	2016_10	0	0
Purbayan	Kotagede	2016_10	0	0
Purwokinanti	Pakualaman	2016_10	0	0
Rejowinangun	Kotagede	2016_10	0	0
Semaki	Umbulharjo	2016_10	0	0
Sorosutan	Umbulharjo	2016_10	0	0
Sosromenduran	Gedong Tengen	2016_10	0	0
Suryodiningratan	Mantrijeron	2016_10	0	0
Tahunan	Umbulharjo	2016_10	0	0
Tegal Panggung	Danurejan	2016_10	0	0
Tegalrejo	Tegalrejo	2016_10	416	78	18.75
Terban	Gondokusuman	2016_10	0	0
Warungboto	Umbulharjo	2016_10	0	0
Wirobrajan	Wirobrajan	2016_10	477	70	14.6751
Wirogunan	Mergangsan	2016_10	0	0
Baciro	Gondokusuman	2016_11	0	0
Bausasran	Danurejan	2016_11	0	0
Bener	Tegalrejo	2016_11	402	129	32.0896
Brontokusuman	Mergangsan	2016_11	0	0
Bumijo	Jetis	2016_11	0	0
Cokrodiningratan	Jetis	2016_11	0	0
Demangan	Gondokusuman	2016_11	0	0
Gedongkiwo	Mantrijeron	2016_11	0	0
Giwangan	Umbulharjo	2016_11	0	0
Gowongan	Jetis	2016_11	0	0
Gunung Ketur	Pakualaman	2016_11	0	0
Kadipaten	Kraton	2016_11	0	0
Karangwaru	Tegalrejo	2016_11	578	172	29.7578
Keparakan	Mergangsan	2016_11	0	0
Klitren	Gondokusuman	2016_11	0	0
Kotabaru	Gondokusuman	2016_11	0	0
Kricak	Tegalrejo	2016_11	873	282	32.3024
Mantrijeron	Mantrijeron	2016_11	0	0
Muja Muju	Umbulharjo	2016_11	0	0
Ngampilan	Ngampilan	2016_11	0	0
Ngupasan	Gondomanan	2016_11	0	0
Notoprajan	Ngampilan	2016_11	0	0
Pakuncen	Wirobrajan	2016_11	1019	224	21.9823
Pandeyan	Umbulharjo	2016_11	0	0
Panembahan	Kraton	2016_11	0	0
Patangpuluhan	Wirobrajan	2016_11	391	123	31.4578
Patehan	Kraton	2016_11	0	0
Prawirodirjan	Gondomanan	2016_11	0	0
Prenggan	Kotagede	2016_11	0	0
Pringgokusuman	Gedong Tengen	2016_11	0	0
Purbayan	Kotagede	2016_11	0	0
Purwokinanti	Pakualaman	2016_11	0	0
Rejowinangun	Kotagede	2016_11	0	0
Semaki	Umbulharjo	2016_11	0	0
Sorosutan	Umbulharjo	2016_11	0	0
Sosromenduran	Gedong Tengen	2016_11	0	0
Suryodiningratan	Mantrijeron	2016_11	0	0
Tahunan	Umbulharjo	2016_11	0	0
Tegal Panggung	Danurejan	2016_11	0	0
Tegalrejo	Tegalrejo	2016_11	757	160	21.1361
Terban	Gondokusuman	2016_11	0	0
Warungboto	Umbulharjo	2016_11	0	0
Wirobrajan	Wirobrajan	2016_11	633	137	21.643
Wirogunan	Mergangsan	2016_11	0	0
Baciro	Gondokusuman	2016_12	0	0
Bausasran	Danurejan	2016_12	0	0
Bener	Tegalrejo	2016_12	351	176	50.1424
Brontokusuman	Mergangsan	2016_12	0	0
Bumijo	Jetis	2016_12	0	0
Cokrodiningratan	Jetis	2016_12	0	0
Demangan	Gondokusuman	2016_12	0	0
Gedongkiwo	Mantrijeron	2016_12	0	0
Giwangan	Umbulharjo	2016_12	0	0
Gowongan	Jetis	2016_12	0	0
Gunung Ketur	Pakualaman	2016_12	0	0
Kadipaten	Kraton	2016_12	0	0
Karangwaru	Tegalrejo	2016_12	573	238	41.5358
Keparakan	Mergangsan	2016_12	0	0
Klitren	Gondokusuman	2016_12	0	0
Kotabaru	Gondokusuman	2016_12	0	0
Kricak	Tegalrejo	2016_12	448	176	39.2857
Mantrijeron	Mantrijeron	2016_12	0	0
Muja Muju	Umbulharjo	2016_12	0	0
Ngampilan	Ngampilan	2016_12	0	0
Ngupasan	Gondomanan	2016_12	0	0
Notoprajan	Ngampilan	2016_12	0	0
Pakuncen	Wirobrajan	2016_12	1251	398	31.8145
Pandeyan	Umbulharjo	2016_12	0	0
Panembahan	Kraton	2016_12	0	0
Patangpuluhan	Wirobrajan	2016_12	281	135	48.0427
Patehan	Kraton	2016_12	0	0
Prawirodirjan	Gondomanan	2016_12	0	0
Prenggan	Kotagede	2016_12	0	0
Pringgokusuman	Gedong Tengen	2016_12	0	0
Purbayan	Kotagede	2016_12	0	0
Purwokinanti	Pakualaman	2016_12	0	0
Rejowinangun	Kotagede	2016_12	0	0
Semaki	Umbulharjo	2016_12	0	0
Sorosutan	Umbulharjo	2016_12	0	0
Sosromenduran	Gedong Tengen	2016_12	0	0
Suryodiningratan	Mantrijeron	2016_12	0	0
Tahunan	Umbulharjo	2016_12	0	0
Tegal Panggung	Danurejan	2016_12	0	0
Tegalrejo	Tegalrejo	2016_12	500	153	30.6
Terban	Gondokusuman	2016_12	0	0
Warungboto	Umbulharjo	2016_12	0	0
Wirobrajan	Wirobrajan	2016_12	694	222	31.9885
Wirogunan	Mergangsan	2016_12	0	0
Baciro	Gondokusuman	2017_01	0	0
Bausasran	Danurejan	2017_01	0	0
Bener	Tegalrejo	2017_01	349	209	59.8854
Brontokusuman	Mergangsan	2017_01	0	0
Bumijo	Jetis	2017_01	0	0
Cokrodiningratan	Jetis	2017_01	0	0
Demangan	Gondokusuman	2017_01	0	0
Gedongkiwo	Mantrijeron	2017_01	0	0
Giwangan	Umbulharjo	2017_01	0	0
Gowongan	Jetis	2017_01	0	0
Gunung Ketur	Pakualaman	2017_01	0	0
Kadipaten	Kraton	2017_01	0	0
Karangwaru	Tegalrejo	2017_01	401	190	47.3815
Keparakan	Mergangsan	2017_01	0	0
Klitren	Gondokusuman	2017_01	0	0
Kotabaru	Gondokusuman	2017_01	0	0
Kricak	Tegalrejo	2017_01	416	212	50.9615
Mantrijeron	Mantrijeron	2017_01	0	0
Muja Muju	Umbulharjo	2017_01	0	0
Ngampilan	Ngampilan	2017_01	0	0
Ngupasan	Gondomanan	2017_01	0	0
Notoprajan	Ngampilan	2017_01	0	0
Pakuncen	Wirobrajan	2017_01	841	432	51.3674
Pandeyan	Umbulharjo	2017_01	0	0
Panembahan	Kraton	2017_01	0	0
Patangpuluhan	Wirobrajan	2017_01	267	147	55.0562
Patehan	Kraton	2017_01	0	0
Prawirodirjan	Gondomanan	2017_01	0	0
Prenggan	Kotagede	2017_01	0	0
Pringgokusuman	Gedong Tengen	2017_01	0	0
Purbayan	Kotagede	2017_01	0	0
Purwokinanti	Pakualaman	2017_01	0	0
Rejowinangun	Kotagede	2017_01	0	0
Semaki	Umbulharjo	2017_01	0	0
Sorosutan	Umbulharjo	2017_01	0	0
Sosromenduran	Gedong Tengen	2017_01	0	0
Suryodiningratan	Mantrijeron	2017_01	0	0
Tahunan	Umbulharjo	2017_01	0	0
Tegal Panggung	Danurejan	2017_01	0	0
Tegalrejo	Tegalrejo	2017_01	409	171	41.8093
Terban	Gondokusuman	2017_01	0	0
Warungboto	Umbulharjo	2017_01	0	0
Wirobrajan	Wirobrajan	2017_01	410	171	41.7073
Wirogunan	Mergangsan	2017_01	0	0
Baciro	Gondokusuman	2017_02	0	0
Bausasran	Danurejan	2017_02	0	0
Bener	Tegalrejo	2017_02	171	122	71.345
Brontokusuman	Mergangsan	2017_02	0	0
Bumijo	Jetis	2017_02	0	0
Cokrodiningratan	Jetis	2017_02	0	0
Demangan	Gondokusuman	2017_02	0	0
Gedongkiwo	Mantrijeron	2017_02	0	0
Giwangan	Umbulharjo	2017_02	0	0
Gowongan	Jetis	2017_02	0	0
Gunung Ketur	Pakualaman	2017_02	0	0
Kadipaten	Kraton	2017_02	0	0
Karangwaru	Tegalrejo	2017_02	378	217	57.4074
Keparakan	Mergangsan	2017_02	0	0
Klitren	Gondokusuman	2017_02	0	0
Kotabaru	Gondokusuman	2017_02	0	0
Kricak	Tegalrejo	2017_02	365	233	63.8356
Mantrijeron	Mantrijeron	2017_02	0	0
Muja Muju	Umbulharjo	2017_02	0	0
Ngampilan	Ngampilan	2017_02	0	0
Ngupasan	Gondomanan	2017_02	0	0
Notoprajan	Ngampilan	2017_02	0	0
Pakuncen	Wirobrajan	2017_02	752	470	62.5
Pandeyan	Umbulharjo	2017_02	0	0
Panembahan	Kraton	2017_02	0	0
Patangpuluhan	Wirobrajan	2017_02	185	132	71.3513
Patehan	Kraton	2017_02	0	0
Prawirodirjan	Gondomanan	2017_02	0	0
Prenggan	Kotagede	2017_02	0	0
Pringgokusuman	Gedong Tengen	2017_02	0	0
Purbayan	Kotagede	2017_02	0	0
Purwokinanti	Pakualaman	2017_02	0	0
Rejowinangun	Kotagede	2017_02	0	0
Semaki	Umbulharjo	2017_02	0	0
Sorosutan	Umbulharjo	2017_02	0	0
Sosromenduran	Gedong Tengen	2017_02	0	0
Suryodiningratan	Mantrijeron	2017_02	0	0
Tahunan	Umbulharjo	2017_02	0	0
Tegal Panggung	Danurejan	2017_02	0	0
Tegalrejo	Tegalrejo	2017_02	342	183	53.5088
Terban	Gondokusuman	2017_02	0	0
Warungboto	Umbulharjo	2017_02	0	0
Wirobrajan	Wirobrajan	2017_02	456	272	59.6491
Wirogunan	Mergangsan	2017_02	0	0
Baciro	Gondokusuman	2017_03	0	0
Bausasran	Danurejan	2017_03	0	0
Bener	Tegalrejo	2017_03	213	173	81.2207
Brontokusuman	Mergangsan	2017_03	0	0
Bumijo	Jetis	2017_03	0	0
Cokrodiningratan	Jetis	2017_03	58	1	1.72414
Demangan	Gondokusuman	2017_03	0	0
Gedongkiwo	Mantrijeron	2017_03	0	0
Giwangan	Umbulharjo	2017_03	0	0
Gowongan	Jetis	2017_03	0	0
Gunung Ketur	Pakualaman	2017_03	0	0
Kadipaten	Kraton	2017_03	0	0
Karangwaru	Tegalrejo	2017_03	393	321	81.6794
Keparakan	Mergangsan	2017_03	0	0
Klitren	Gondokusuman	2017_03	45	5	11.1111
Kotabaru	Gondokusuman	2017_03	0	0
Kricak	Tegalrejo	2017_03	394	306	77.665
Mantrijeron	Mantrijeron	2017_03	0	0
Muja Muju	Umbulharjo	2017_03	0	0
Ngampilan	Ngampilan	2017_03	0	0
Ngupasan	Gondomanan	2017_03	0	0
Notoprajan	Ngampilan	2017_03	0	0
Pakuncen	Wirobrajan	2017_03	705	511	72.4823
Pandeyan	Umbulharjo	2017_03	0	0
Panembahan	Kraton	2017_03	0	0
Patangpuluhan	Wirobrajan	2017_03	174	157	90.2299
Patehan	Kraton	2017_03	0	0
Prawirodirjan	Gondomanan	2017_03	0	0
Prenggan	Kotagede	2017_03	0	0
Pringgokusuman	Gedong Tengen	2017_03	0	0
Purbayan	Kotagede	2017_03	0	0
Purwokinanti	Pakualaman	2017_03	0	0
Rejowinangun	Kotagede	2017_03	0	0
Semaki	Umbulharjo	2017_03	0	0
Sorosutan	Umbulharjo	2017_03	0	0
Sosromenduran	Gedong Tengen	2017_03	0	0
Suryodiningratan	Mantrijeron	2017_03	0	0
Tahunan	Umbulharjo	2017_03	0	0
Tegal Panggung	Danurejan	2017_03	0	0
Tegalrejo	Tegalrejo	2017_03	383	273	71.2794
Terban	Gondokusuman	2017_03	83	3	3.61446
Warungboto	Umbulharjo	2017_03	0	0
Wirobrajan	Wirobrajan	2017_03	407	300	73.7101
Wirogunan	Mergangsan	2017_03	0	0
Baciro	Gondokusuman	2017_04	0	0
Bener	Tegalrejo	2017_04	95	85	89.4737
Cokrodiningratan	Jetis	2017_04	196	20	10.2041
Demangan	Gondokusuman	2017_04	3	3
Gedongkiwo	Mantrijeron	2017_04	0	0
Gunung Ketur	Pakualaman	2017_04	0	0
Kadipaten	Kraton	2017_04	0	0
Karangwaru	Tegalrejo	2017_04	139	109	78.4173
Klitren	Gondokusuman	2017_04	97	16	16.4948
Kricak	Tegalrejo	2017_04	153	124	81.0458
Mantrijeron	Mantrijeron	2017_04	267	62	23.221
Muja Muju	Umbulharjo	2017_04	64	5	7.8125
Ngampilan	Ngampilan	2017_04	0	0
Ngupasan	Gondomanan	2017_04	0	0
Notoprajan	Ngampilan	2017_04	0	0
Pakuncen	Wirobrajan	2017_04	258	229	88.7597
Patangpuluhan	Wirobrajan	2017_04	66	53	80.303
Patehan	Kraton	2017_04	0	0
Prenggan	Kotagede	2017_04	0	0
Pringgokusuman	Gedong Tengen	2017_04	0	0
Purbayan	Kotagede	2017_04	0	0
Rejowinangun	Kotagede	2017_04	0	0
Semaki	Umbulharjo	2017_04	0	0
Sorosutan	Umbulharjo	2017_04	110	21	19.0909
Sosromenduran	Gedong Tengen	2017_04	0	0
Tahunan	Umbulharjo	2017_04	25	1	4
Tegalrejo	Tegalrejo	2017_04	107	78	72.8972
Terban	Gondokusuman	2017_04	169	63	37.2781
Warungboto	Umbulharjo	2017_04	194	27	13.9175
Wirobrajan	Wirobrajan	2017_04	113	88	77.8761
Wirogunan	Mergangsan	2017_04	76	13	17.1053
Baciro	Gondokusuman	2017_05	254	41	16.1417
Bausasran	Danurejan	2017_05	0	0
Bener	Tegalrejo	2017_05	82	80	97.561
Brontokusuman	Mergangsan	2017_05	0	0
Bumijo	Jetis	2017_05	0	0
Cokrodiningratan	Jetis	2017_05	365	67	18.3562
Demangan	Gondokusuman	2017_05	4	2
Gedongkiwo	Mantrijeron	2017_05	8	1
Giwangan	Umbulharjo	2017_05	0	0
Gowongan	Jetis	2017_05	0	0
Gunung Ketur	Pakualaman	2017_05	0	0
Kadipaten	Kraton	2017_05	35	4	11.4286
Karangwaru	Tegalrejo	2017_05	152	129	84.8684
Klitren	Gondokusuman	2017_05	156	47	30.1282
Kotabaru	Gondokusuman	2017_05	0	0
Kricak	Tegalrejo	2017_05	172	152	88.3721
Mantrijeron	Mantrijeron	2017_05	490	222	45.3061
Muja Muju	Umbulharjo	2017_05	302	57	18.8742
Ngampilan	Ngampilan	2017_05	72	3	4.16667
Ngupasan	Gondomanan	2017_05	12	1	8.33333
Notoprajan	Ngampilan	2017_05	3	0
Pakuncen	Wirobrajan	2017_05	223	208	93.2735
Pandeyan	Umbulharjo	2017_05	0	0
Patangpuluhan	Wirobrajan	2017_05	44	40	90.9091
Patehan	Kraton	2017_05	46	4	8.69565
Prenggan	Kotagede	2017_05	0	0
Pringgokusuman	Gedong Tengen	2017_05	446	54	12.1076
Purbayan	Kotagede	2017_05	0	0
Purwokinanti	Pakualaman	2017_05	6	1
Rejowinangun	Kotagede	2017_05	0	0
Semaki	Umbulharjo	2017_05	134	37	27.6119
Sorosutan	Umbulharjo	2017_05	350	119	34
Sosromenduran	Gedong Tengen	2017_05	151	20	13.245
Suryatmajan	Danurejan	2017_05	5	1
Suryodiningratan	Mantrijeron	2017_05	0	0
Tahunan	Umbulharjo	2017_05	34	0	0
Tegal Panggung	Danurejan	2017_05	24	0	0
Tegalrejo	Tegalrejo	2017_05	91	74	81.3187
Terban	Gondokusuman	2017_05	237	94	39.6624
Warungboto	Umbulharjo	2017_05	207	34	16.4251
Wirobrajan	Wirobrajan	2017_05	93	68	73.1183
Wirogunan	Mergangsan	2017_05	235	33	14.0426
Baciro	Gondokusuman	2017_06	141	24	17.0213
Bausasran	Danurejan	2017_06	0	0
Bener	Tegalrejo	2017_06	46	43	93.4783
Brontokusuman	Mergangsan	2017_06	0	0
Bumijo	Jetis	2017_06	0	0
Cokrodiningratan	Jetis	2017_06	134	42	31.3433
Demangan	Gondokusuman	2017_06	5	4
Gedongkiwo	Mantrijeron	2017_06	30	4	13.3333
Giwangan	Umbulharjo	2017_06	0	0
Gowongan	Jetis	2017_06	0	0
Gunung Ketur	Pakualaman	2017_06	47	17	36.1702
Kadipaten	Kraton	2017_06	69	24	34.7826
Karangwaru	Tegalrejo	2017_06	125	114	91.2
Keparakan	Mergangsan	2017_06	0	0
Klitren	Gondokusuman	2017_06	128	47	36.7188
Kotabaru	Gondokusuman	2017_06	0	0
Kricak	Tegalrejo	2017_06	176	164	93.1818
Mantrijeron	Mantrijeron	2017_06	238	94	39.4958
Muja Muju	Umbulharjo	2017_06	157	50	31.8471
Ngampilan	Ngampilan	2017_06	16	2	12.5
Ngupasan	Gondomanan	2017_06	8	1
Notoprajan	Ngampilan	2017_06	15	1	6.66667
Pakuncen	Wirobrajan	2017_06	131	126	96.1832
Pandeyan	Umbulharjo	2017_06	0	0
Panembahan	Kraton	2017_06	0	0
Patangpuluhan	Wirobrajan	2017_06	40	38	95
Patehan	Kraton	2017_06	53	6	11.3208
Prawirodirjan	Gondomanan	2017_06	0	0
Prenggan	Kotagede	2017_06	0	0
Pringgokusuman	Gedong Tengen	2017_06	222	81	36.4865
Purbayan	Kotagede	2017_06	0	0
Purwokinanti	Pakualaman	2017_06	24	8	33.3333
Rejowinangun	Kotagede	2017_06	0	0
Semaki	Umbulharjo	2017_06	70	28	40
Sorosutan	Umbulharjo	2017_06	274	102	37.2263
Sosromenduran	Gedong Tengen	2017_06	71	20	28.169
Suryatmajan	Danurejan	2017_06	6	1
Suryodiningratan	Mantrijeron	2017_06	0	0
Tahunan	Umbulharjo	2017_06	34	12	35.2941
Tegal Panggung	Danurejan	2017_06	24	3	12.5
Tegalrejo	Tegalrejo	2017_06	82	64	78.0488
Terban	Gondokusuman	2017_06	183	87	47.541
Warungboto	Umbulharjo	2017_06	224	62	27.6786
Wirobrajan	Wirobrajan	2017_06	74	65	87.8378
Wirogunan	Mergangsan	2017_06	259	71	27.4131
Baciro	Gondokusuman	2017_07	455	125	27.4725
Bausasran	Danurejan	2017_07	0	0
Bener	Tegalrejo	2017_07	25	23	92
Brontokusuman	Mergangsan	2017_07	0	0
Bumijo	Jetis	2017_07	0	0
Cokrodiningratan	Jetis	2017_07	252	123	48.8095
Demangan	Gondokusuman	2017_07	6	2
Gedongkiwo	Mantrijeron	2017_07	103	18	17.4757
Giwangan	Umbulharjo	2017_07	0	0
Gowongan	Jetis	2017_07	0	0
Gunung Ketur	Pakualaman	2017_07	47	11	23.4043
Kadipaten	Kraton	2017_07	181	52	28.7293
Karangwaru	Tegalrejo	2017_07	123	110	89.4309
Keparakan	Mergangsan	2017_07	0	0
Klitren	Gondokusuman	2017_07	158	59	37.3418
Kotabaru	Gondokusuman	2017_07	0	0
Kricak	Tegalrejo	2017_07	130	122	93.8462
Mantrijeron	Mantrijeron	2017_07	274	103	37.5912
Muja Muju	Umbulharjo	2017_07	340	104	30.5882
Ngampilan	Ngampilan	2017_07	35	10	28.5714
Ngupasan	Gondomanan	2017_07	42	14	33.3333
Notoprajan	Ngampilan	2017_07	29	3	10.3448
Pakuncen	Wirobrajan	2017_07	155	150	96.7742
Pandeyan	Umbulharjo	2017_07	0	0
Panembahan	Kraton	2017_07	0	0
Patangpuluhan	Wirobrajan	2017_07	31	29	93.5484
Patehan	Kraton	2017_07	197	50	25.3807
Prawirodirjan	Gondomanan	2017_07	0	0
Prenggan	Kotagede	2017_07	0	0
Pringgokusuman	Gedong Tengen	2017_07	547	170	31.0786
Purbayan	Kotagede	2017_07	0	0
Purwokinanti	Pakualaman	2017_07	21	7	33.3333
Rejowinangun	Kotagede	2017_07	0	0
Semaki	Umbulharjo	2017_07	218	77	35.3211
Sorosutan	Umbulharjo	2017_07	452	159	35.177
Sosromenduran	Gedong Tengen	2017_07	429	115	26.8065
Suryatmajan	Danurejan	2017_07	64	19	29.6875
Suryodiningratan	Mantrijeron	2017_07	0	0
Tahunan	Umbulharjo	2017_07	25	1	4
Tegal Panggung	Danurejan	2017_07	87	25	28.7356
Tegalrejo	Tegalrejo	2017_07	79	69	87.3418
Terban	Gondokusuman	2017_07	376	234	62.234
Warungboto	Umbulharjo	2017_07	333	117	35.1351
Wirobrajan	Wirobrajan	2017_07	82	72	87.8049
Wirogunan	Mergangsan	2017_07	408	110	26.9608
Baciro	Gondokusuman	2017_08	512	193	37.6953
Bausasran	Danurejan	2017_08	0	0
Bener	Tegalrejo	2017_08	54	49	90.7407
Brontokusuman	Mergangsan	2017_08	0	0
Bumijo	Jetis	2017_08	0	0
Cokrodiningratan	Jetis	2017_08	161	105	65.2174
Demangan	Gondokusuman	2017_08	10	8	80
Gedongkiwo	Mantrijeron	2017_08	48	19	39.5833
Giwangan	Umbulharjo	2017_08	0	0
Gowongan	Jetis	2017_08	0	0
Gunung Ketur	Pakualaman	2017_08	53	23	43.3962
Kadipaten	Kraton	2017_08	203	106	52.2167
Karangwaru	Tegalrejo	2017_08	102	99	97.0588
Keparakan	Mergangsan	2017_08	0	0
Klitren	Gondokusuman	2017_08	142	59	41.5493
Kotabaru	Gondokusuman	2017_08	0	0
Kricak	Tegalrejo	2017_08	150	141	94
Mantrijeron	Mantrijeron	2017_08	340	184	54.1176
Muja Muju	Umbulharjo	2017_08	459	268	58.3878
Ngampilan	Ngampilan	2017_08	28	13	46.4286
Ngupasan	Gondomanan	2017_08	58	16	27.5862
Notoprajan	Ngampilan	2017_08	22	10	45.4545
Pakuncen	Wirobrajan	2017_08	107	99	92.5234
Pandeyan	Umbulharjo	2017_08	0	0
Panembahan	Kraton	2017_08	0	0
Patangpuluhan	Wirobrajan	2017_08	31	31	100
Patehan	Kraton	2017_08	220	76	34.5455
Prawirodirjan	Gondomanan	2017_08	0	0
Prenggan	Kotagede	2017_08	37	0	0
Pringgokusuman	Gedong Tengen	2017_08	387	146	37.7261
Purbayan	Kotagede	2017_08	22	0	0
Purwokinanti	Pakualaman	2017_08	54	11	20.3704
Rejowinangun	Kotagede	2017_08	19	0	0
Semaki	Umbulharjo	2017_08	196	74	37.7551
Sorosutan	Umbulharjo	2017_08	432	251	58.1019
Sosromenduran	Gedong Tengen	2017_08	232	82	35.3448
Suryatmajan	Danurejan	2017_08	70	26	37.1429
Suryodiningratan	Mantrijeron	2017_08	0	0
Tahunan	Umbulharjo	2017_08	36	12	33.3333
Tegal Panggung	Danurejan	2017_08	47	12	25.5319
Tegalrejo	Tegalrejo	2017_08	53	48	90.566
Terban	Gondokusuman	2017_08	209	144	68.8995
Warungboto	Umbulharjo	2017_08	292	125	42.8082
Wirobrajan	Wirobrajan	2017_08	101	93	92.0792
Wirogunan	Mergangsan	2017_08	438	190	43.379
Baciro	Gondokusuman	2017_09	551	344	62.4319
Bausasran	Danurejan	2017_09	0	0
Bener	Tegalrejo	2017_09	36	35	97.2222
Brontokusuman	Mergangsan	2017_09	0	0
Bumijo	Jetis	2017_09	0	0
Cokrodiningratan	Jetis	2017_09	138	90	65.2174
Demangan	Gondokusuman	2017_09	8	7
Gedongkiwo	Mantrijeron	2017_09	24	12	50
Giwangan	Umbulharjo	2017_09	0	0
Gowongan	Jetis	2017_09	0	0
Gunung Ketur	Pakualaman	2017_09	12	3	25
Kadipaten	Kraton	2017_09	132	87	65.9091
Karangwaru	Tegalrejo	2017_09	29	27	93.1034
Keparakan	Mergangsan	2017_09	0	0
Klitren	Gondokusuman	2017_09	112	62	55.3571
Kotabaru	Gondokusuman	2017_09	0	0
Kricak	Tegalrejo	2017_09	45	41	91.1111
Mantrijeron	Mantrijeron	2017_09	224	149	66.5179
Muja Muju	Umbulharjo	2017_09	353	264	74.7875
Ngampilan	Ngampilan	2017_09	13	5	38.4615
Ngupasan	Gondomanan	2017_09	20	8	40
Notoprajan	Ngampilan	2017_09	9	5
Pakuncen	Wirobrajan	2017_09	25	22	88
Pandeyan	Umbulharjo	2017_09	0	0
Panembahan	Kraton	2017_09	0	0
Patangpuluhan	Wirobrajan	2017_09	18	18	100
Patehan	Kraton	2017_09	211	86	40.7583
Prawirodirjan	Gondomanan	2017_09	0	0
Prenggan	Kotagede	2017_09	10	0	0
Pringgokusuman	Gedong Tengen	2017_09	356	196	55.0562
Purbayan	Kotagede	2017_09	27	0	0
Purwokinanti	Pakualaman	2017_09	35	8	22.8571
Rejowinangun	Kotagede	2017_09	8	0
Semaki	Umbulharjo	2017_09	88	33	37.5
Sorosutan	Umbulharjo	2017_09	373	286	76.6756
Sosromenduran	Gedong Tengen	2017_09	242	122	50.4132
Suryatmajan	Danurejan	2017_09	33	15	45.4545
Suryodiningratan	Mantrijeron	2017_09	0	0
Tahunan	Umbulharjo	2017_09	56	31	55.3571
Tegal Panggung	Danurejan	2017_09	42	20	47.619
Tegalrejo	Tegalrejo	2017_09	24	21	87.5
Terban	Gondokusuman	2017_09	192	164	85.4167
Warungboto	Umbulharjo	2017_09	262	162	61.8321
Wirobrajan	Wirobrajan	2017_09	55	51	92.7273
Wirogunan	Mergangsan	2017_09	270	158	58.5185
Baciro	Gondokusuman	2017_10	947	600	63.358
Bausasran	Danurejan	2017_10	0	0
Bener	Tegalrejo	2017_10	94	90	95.7447
Brontokusuman	Mergangsan	2017_10	0	0
Bumijo	Jetis	2017_10	0	0
Cokrodiningratan	Jetis	2017_10	132	95	71.9697
Demangan	Gondokusuman	2017_10	7	6
Gedongkiwo	Mantrijeron	2017_10	37	24	64.8649
Giwangan	Umbulharjo	2017_10	0	0
Gowongan	Jetis	2017_10	0	0
Gunung Ketur	Pakualaman	2017_10	51	28	54.902
Kadipaten	Kraton	2017_10	171	111	64.9123
Karangwaru	Tegalrejo	2017_10	34	32	94.1176
Keparakan	Mergangsan	2017_10	0	0
Klitren	Gondokusuman	2017_10	200	135	67.5
Kotabaru	Gondokusuman	2017_10	0	0
Kricak	Tegalrejo	2017_10	96	92	95.8333
Mantrijeron	Mantrijeron	2017_10	450	351	78
Muja Muju	Umbulharjo	2017_10	414	316	76.3285
Ngampilan	Ngampilan	2017_10	49	30	61.2245
Ngupasan	Gondomanan	2017_10	110	73	66.3636
Notoprajan	Ngampilan	2017_10	8	7
Pakuncen	Wirobrajan	2017_10	139	138	99.2806
Pandeyan	Umbulharjo	2017_10	0	0
Panembahan	Kraton	2017_10	0	0
Patangpuluhan	Wirobrajan	2017_10	17	15	88.2353
Patehan	Kraton	2017_10	113	60	53.0973
Prawirodirjan	Gondomanan	2017_10	0	0
Prenggan	Kotagede	2017_10	27	1	3.7037
Pringgokusuman	Gedong Tengen	2017_10	543	377	69.4291
Purbayan	Kotagede	2017_10	5	0
Purwokinanti	Pakualaman	2017_10	33	19	57.5758
Rejowinangun	Kotagede	2017_10	22	0	0
Semaki	Umbulharjo	2017_10	199	111	55.7789
Sorosutan	Umbulharjo	2017_10	406	331	81.5271
Sosromenduran	Gedong Tengen	2017_10	263	146	55.5133
Suryatmajan	Danurejan	2017_10	60	36	60
Suryodiningratan	Mantrijeron	2017_10	0	0
Tahunan	Umbulharjo	2017_10	92	43	46.7391
Tegal Panggung	Danurejan	2017_10	94	61	64.8936
Tegalrejo	Tegalrejo	2017_10	48	46	95.8333
Terban	Gondokusuman	2017_10	283	252	89.0459
Warungboto	Umbulharjo	2017_10	381	244	64.042
Wirobrajan	Wirobrajan	2017_10	112	104	92.8571
Wirogunan	Mergangsan	2017_10	393	249	63.3588
Baciro	Gondokusuman	2017_11	744	511	68.6828
Bausasran	Danurejan	2017_11	75	1	1.33333
Bener	Tegalrejo	2017_11	66	64	96.9697
Brontokusuman	Mergangsan	2017_11	177	11	6.21469
Bumijo	Jetis	2017_11	40	0	0
Cokrodiningratan	Jetis	2017_11	109	89	81.6514
Demangan	Gondokusuman	2017_11	30	1	3.33333
Gedongkiwo	Mantrijeron	2017_11	193	40	20.7254
Giwangan	Umbulharjo	2017_11	82	1	1.21951
Gowongan	Jetis	2017_11	78	1	1.28205
Gunung Ketur	Pakualaman	2017_11	74	34	45.9459
Kadipaten	Kraton	2017_11	304	235	77.3026
Karangwaru	Tegalrejo	2017_11	43	42	97.6744
Keparakan	Mergangsan	2017_11	86	2	2.32558
Klitren	Gondokusuman	2017_11	114	63	55.2632
Kotabaru	Gondokusuman	2017_11	38	8	21.0526
Kricak	Tegalrejo	2017_11	58	57	98.2759
Mantrijeron	Mantrijeron	2017_11	413	333	80.6295
Muja Muju	Umbulharjo	2017_11	283	216	76.3251
Ngampilan	Ngampilan	2017_11	118	73	61.8644
Ngupasan	Gondomanan	2017_11	163	96	58.8957
Notoprajan	Ngampilan	2017_11	98	37	37.7551
Pakuncen	Wirobrajan	2017_11	119	115	96.6387
Pandeyan	Umbulharjo	2017_11	54	5	9.25926
Panembahan	Kraton	2017_11	97	2	2.06186
Patangpuluhan	Wirobrajan	2017_11	28	25	89.2857
Patehan	Kraton	2017_11	171	77	45.0292
Prawirodirjan	Gondomanan	2017_11	51	0	0
Prenggan	Kotagede	2017_11	41	0	0
Pringgokusuman	Gedong Tengen	2017_11	477	356	74.6331
Purbayan	Kotagede	2017_11	15	1	6.66667
Purwokinanti	Pakualaman	2017_11	100	48	48
Rejowinangun	Kotagede	2017_11	31	0	0
Semaki	Umbulharjo	2017_11	174	117	67.2414
Sorosutan	Umbulharjo	2017_11	218	164	75.2294
Sosromenduran	Gedong Tengen	2017_11	313	218	69.6486
Suryatmajan	Danurejan	2017_11	135	96	71.1111
Suryodiningratan	Mantrijeron	2017_11	89	1	1.1236
Tahunan	Umbulharjo	2017_11	80	35	43.75
Tegal Panggung	Danurejan	2017_11	128	84	65.625
Tegalrejo	Tegalrejo	2017_11	74	66	89.1892
Terban	Gondokusuman	2017_11	158	144	91.1392
Warungboto	Umbulharjo	2017_11	361	269	74.5152
Wirobrajan	Wirobrajan	2017_11	55	54	98.1818
Wirogunan	Mergangsan	2017_11	382	255	66.7539
Baciro	Gondokusuman	2017_12	256	175	68.3594
Bausasran	Danurejan	2017_12	152	2	1.31579
Bener	Tegalrejo	2017_12	51	45	88.2353
Brontokusuman	Mergangsan	2017_12	293	15	5.11945
Bumijo	Jetis	2017_12	63	1	1.5873
Cokrodiningratan	Jetis	2017_12	98	83	84.6939
Demangan	Gondokusuman	2017_12	88	7	7.95455
Gedongkiwo	Mantrijeron	2017_12	182	45	24.7253
Giwangan	Umbulharjo	2017_12	167	0	0
Gowongan	Jetis	2017_12	123	1	0.813008
Gunung Ketur	Pakualaman	2017_12	41	10	24.3902
Kadipaten	Kraton	2017_12	220	193	87.7273
Karangwaru	Tegalrejo	2017_12	37	34	91.8919
Keparakan	Mergangsan	2017_12	135	0	0
Klitren	Gondokusuman	2017_12	95	45	47.3684
Kotabaru	Gondokusuman	2017_12	56	5	8.92857
Kricak	Tegalrejo	2017_12	61	59	96.7213
Mantrijeron	Mantrijeron	2017_12	211	178	84.3602
Muja Muju	Umbulharjo	2017_12	274	237	86.4964
Ngampilan	Ngampilan	2017_12	49	35	71.4286
Ngupasan	Gondomanan	2017_12	95	55	57.8947
Notoprajan	Ngampilan	2017_12	81	21	25.9259
Pakuncen	Wirobrajan	2017_12	131	127	96.9466
Pandeyan	Umbulharjo	2017_12	104	3	2.88462
Panembahan	Kraton	2017_12	159	5	3.14465
Patangpuluhan	Wirobrajan	2017_12	43	43	100
Patehan	Kraton	2017_12	105	63	60
Prawirodirjan	Gondomanan	2017_12	63	7	11.1111
Prenggan	Kotagede	2017_12	45	0	0
Pringgokusuman	Gedong Tengen	2017_12	354	248	70.0565
Purbayan	Kotagede	2017_12	19	0	0
Purwokinanti	Pakualaman	2017_12	46	16	34.7826
Rejowinangun	Kotagede	2017_12	21	0	0
Semaki	Umbulharjo	2017_12	115	45	39.1304
Sorosutan	Umbulharjo	2017_12	233	160	68.6695
Sosromenduran	Gedong Tengen	2017_12	228	147	64.4737
Suryatmajan	Danurejan	2017_12	64	43	67.1875
Suryodiningratan	Mantrijeron	2017_12	247	3	1.21457
Tahunan	Umbulharjo	2017_12	98	34	34.6939
Tegal Panggung	Danurejan	2017_12	52	37	71.1538
Tegalrejo	Tegalrejo	2017_12	37	37	100
Terban	Gondokusuman	2017_12	204	190	93.1373
Warungboto	Umbulharjo	2017_12	105	90	85.7143
Wirobrajan	Wirobrajan	2017_12	68	64	94.1176
Wirogunan	Mergangsan	2017_12	337	269	79.822
Baciro	Gondokusuman	2018_01	260	168	64.6154
Bausasran	Danurejan	2018_01	105	4	3.80952
Bener	Tegalrejo	2018_01	28	27	96.4286
Brontokusuman	Mergangsan	2018_01	451	27	5.9867
Bumijo	Jetis	2018_01	85	2	2.35294
Cokrodiningratan	Jetis	2018_01	119	111	93.2773
Demangan	Gondokusuman	2018_01	122	10	8.19672
Gedongkiwo	Mantrijeron	2018_01	221	30	13.5747
Giwangan	Umbulharjo	2018_01	38	0	0
Gowongan	Jetis	2018_01	108	2	1.85185
Gunung Ketur	Pakualaman	2018_01	153	76	49.6732
Kadipaten	Kraton	2018_01	82	78	95.1219
Karangwaru	Tegalrejo	2018_01	44	38	86.3636
Keparakan	Mergangsan	2018_01	358	6	1.67598
Klitren	Gondokusuman	2018_01	112	54	48.2143
Kotabaru	Gondokusuman	2018_01	99	9	9.09091
Kricak	Tegalrejo	2018_01	101	96	95.0495
Mantrijeron	Mantrijeron	2018_01	107	92	85.9813
Muja Muju	Umbulharjo	2018_01	257	223	86.7704
Ngampilan	Ngampilan	2018_01	35	10	28.5714
Ngupasan	Gondomanan	2018_01	60	31	51.6667
Notoprajan	Ngampilan	2018_01	159	33	20.7547
Pakuncen	Wirobrajan	2018_01	149	144	96.6443
Pandeyan	Umbulharjo	2018_01	90	4	4.44444
Panembahan	Kraton	2018_01	218	2	0.917431
Patangpuluhan	Wirobrajan	2018_01	59	58	98.3051
Patehan	Kraton	2018_01	87	72	82.7586
Prawirodirjan	Gondomanan	2018_01	69	2	2.89855
Prenggan	Kotagede	2018_01	33	0	0
Pringgokusuman	Gedong Tengen	2018_01	200	182	91
Purbayan	Kotagede	2018_01	46	0	0
Purwokinanti	Pakualaman	2018_01	52	37	71.1538
Rejowinangun	Kotagede	2018_01	31	0	0
Semaki	Umbulharjo	2018_01	138	53	38.4058
Sorosutan	Umbulharjo	2018_01	192	135	70.3125
Sosromenduran	Gedong Tengen	2018_01	133	97	72.9323
Suryatmajan	Danurejan	2018_01	88	68	77.2727
Suryodiningratan	Mantrijeron	2018_01	231	1	0.4329
Tahunan	Umbulharjo	2018_01	125	37	29.6
Tegal Panggung	Danurejan	2018_01	51	43	84.3137
Tegalrejo	Tegalrejo	2018_01	38	36	94.7368
Terban	Gondokusuman	2018_01	144	134	93.0556
Warungboto	Umbulharjo	2018_01	127	104	81.8898
Wirobrajan	Wirobrajan	2018_01	58	58	100
Wirogunan	Mergangsan	2018_01	207	171	82.6087
Baciro	Gondokusuman	2018_02	257	162	63.035
Bausasran	Danurejan	2018_02	135	4	2.96296
Bener	Tegalrejo	2018_02	37	36	97.2973
Brontokusuman	Mergangsan	2018_02	401	28	6.98254
Bumijo	Jetis	2018_02	114	2	1.75439
Cokrodiningratan	Jetis	2018_02	161	150	93.1677
Demangan	Gondokusuman	2018_02	129	8	6.20155
Gedongkiwo	Mantrijeron	2018_02	220	21	9.54545
Giwangan	Umbulharjo	2018_02	87	0	0
Gowongan	Jetis	2018_02	158	4	2.53165
Gunung Ketur	Pakualaman	2018_02	118	60	50.8475
Kadipaten	Kraton	2018_02	130	124	95.3846
Karangwaru	Tegalrejo	2018_02	54	54	100
Keparakan	Mergangsan	2018_02	259	6	2.3166
Klitren	Gondokusuman	2018_02	113	64	56.6372
Kotabaru	Gondokusuman	2018_02	141	20	14.1844
Kricak	Tegalrejo	2018_02	127	126	99.2126
Mantrijeron	Mantrijeron	2018_02	117	95	81.1966
Muja Muju	Umbulharjo	2018_02	298	278	93.2886
Ngampilan	Ngampilan	2018_02	67	22	32.8358
Ngupasan	Gondomanan	2018_02	79	28	35.443
Notoprajan	Ngampilan	2018_02	164	41	25
Pakuncen	Wirobrajan	2018_02	110	109	99.0909
Pandeyan	Umbulharjo	2018_02	191	6	3.14136
Panembahan	Kraton	2018_02	227	9	3.96476
Patangpuluhan	Wirobrajan	2018_02	31	30	96.7742
Patehan	Kraton	2018_02	129	114	88.3721
Prawirodirjan	Gondomanan	2018_02	49	2	4.08163
Prenggan	Kotagede	2018_02	36	0	0
Pringgokusuman	Gedong Tengen	2018_02	189	174	92.0635
Purbayan	Kotagede	2018_02	24	0	0
Purwokinanti	Pakualaman	2018_02	56	37	66.0714
Rejowinangun	Kotagede	2018_02	25	1	4
Semaki	Umbulharjo	2018_02	240	73	30.4167
Sorosutan	Umbulharjo	2018_02	245	148	60.4082
Sosromenduran	Gedong Tengen	2018_02	123	95	77.2358
Suryatmajan	Danurejan	2018_02	124	89	71.7742
Suryodiningratan	Mantrijeron	2018_02	219	1	0.456621
Tahunan	Umbulharjo	2018_02	109	45	41.2844
Tegal Panggung	Danurejan	2018_02	64	60	93.75
Tegalrejo	Tegalrejo	2018_02	41	40	97.561
Terban	Gondokusuman	2018_02	125	118	94.4
Warungboto	Umbulharjo	2018_02	140	110	78.5714
Wirobrajan	Wirobrajan	2018_02	51	48	94.1176
Wirogunan	Mergangsan	2018_02	245	217	88.5714
Baciro	Gondokusuman	2018_03	135	106	78.5185
Bausasran	Danurejan	2018_03	59	4	6.77966
Bener	Tegalrejo	2018_03	30	28	93.3333
Brontokusuman	Mergangsan	2018_03	122	10	8.19672
Bumijo	Jetis	2018_03	48	0	0
Cokrodiningratan	Jetis	2018_03	61	61	100
Demangan	Gondokusuman	2018_03	97	4	4.12371
Gedongkiwo	Mantrijeron	2018_03	109	6	5.50459
Giwangan	Umbulharjo	2018_03	97	1	1.03093
Gowongan	Jetis	2018_03	72	3	4.16667
Gunung Ketur	Pakualaman	2018_03	53	14	26.4151
Kadipaten	Kraton	2018_03	36	36	100
Karangwaru	Tegalrejo	2018_03	37	35	94.5946
Keparakan	Mergangsan	2018_03	51	2	3.92157
Klitren	Gondokusuman	2018_03	42	25	59.5238
Kotabaru	Gondokusuman	2018_03	50	7	14
Kricak	Tegalrejo	2018_03	52	51	98.0769
Mantrijeron	Mantrijeron	2018_03	59	52	88.1356
Muja Muju	Umbulharjo	2018_03	154	147	95.4545
Ngampilan	Ngampilan	2018_03	18	2	11.1111
Ngupasan	Gondomanan	2018_03	46	21	45.6522
Notoprajan	Ngampilan	2018_03	90	34	37.7778
Pakuncen	Wirobrajan	2018_03	105	103	98.0952
Pandeyan	Umbulharjo	2018_03	60	3	5
Panembahan	Kraton	2018_03	138	3	2.17391
Patangpuluhan	Wirobrajan	2018_03	23	23	100
Patehan	Kraton	2018_03	11	10	90.9091
Prawirodirjan	Gondomanan	2018_03	37	2	5.40541
Prenggan	Kotagede	2018_03	16	0	0
Pringgokusuman	Gedong Tengen	2018_03	60	56	93.3333
Purbayan	Kotagede	2018_03	27	0	0
Purwokinanti	Pakualaman	2018_03	20	12	60
Rejowinangun	Kotagede	2018_03	17	1	5.88235
Semaki	Umbulharjo	2018_03	149	38	25.5034
Sorosutan	Umbulharjo	2018_03	97	67	69.0722
Sosromenduran	Gedong Tengen	2018_03	46	37	80.4348
Suryatmajan	Danurejan	2018_03	57	52	91.2281
Suryodiningratan	Mantrijeron	2018_03	96	1	1.04167
Tahunan	Umbulharjo	2018_03	56	15	26.7857
Tegal Panggung	Danurejan	2018_03	20	20	100
Tegalrejo	Tegalrejo	2018_03	48	47	97.9167
Terban	Gondokusuman	2018_03	39	38	97.4359
Warungboto	Umbulharjo	2018_03	46	42	91.3043
Wirobrajan	Wirobrajan	2018_03	45	42	93.3333
Wirogunan	Mergangsan	2018_03	98	95	96.9388
Baciro	Gondokusuman	2018_04	106	78	73.5849
Bausasran	Danurejan	2018_04	70	3	4.28571
Bener	Tegalrejo	2018_04	19	18	94.7368
Brontokusuman	Mergangsan	2018_04	102	13	12.7451
Bumijo	Jetis	2018_04	72	9	12.5
Cokrodiningratan	Jetis	2018_04	182	178	97.8022
Demangan	Gondokusuman	2018_04	40	3	7.5
Gedongkiwo	Mantrijeron	2018_04	108	19	17.5926
Giwangan	Umbulharjo	2018_04	26	0	0
Gowongan	Jetis	2018_04	133	5	3.7594
Gunung Ketur	Pakualaman	2018_04	41	15	36.5854
Kadipaten	Kraton	2018_04	37	33	89.1892
Karangwaru	Tegalrejo	2018_04	52	46	88.4615
Keparakan	Mergangsan	2018_04	127	5	3.93701
Klitren	Gondokusuman	2018_04	83	53	63.8554
Kotabaru	Gondokusuman	2018_04	55	3	5.45455
Kricak	Tegalrejo	2018_04	48	48	100
Mantrijeron	Mantrijeron	2018_04	56	46	82.1429
Muja Muju	Umbulharjo	2018_04	184	180	97.8261
Ngampilan	Ngampilan	2018_04	72	11	15.2778
Ngupasan	Gondomanan	2018_04	35	20	57.1429
Notoprajan	Ngampilan	2018_04	236	29	12.2881
Pakuncen	Wirobrajan	2018_04	36	34	94.4444
Pandeyan	Umbulharjo	2018_04	55	0	0
Panembahan	Kraton	2018_04	158	5	3.16456
Patangpuluhan	Wirobrajan	2018_04	26	25	96.1538
Patehan	Kraton	2018_04	37	32	86.4865
Prawirodirjan	Gondomanan	2018_04	84	1	1.19048
Prenggan	Kotagede	2018_04	21	0	0
Pringgokusuman	Gedong Tengen	2018_04	156	152	97.4359
Purbayan	Kotagede	2018_04	6	0
Purwokinanti	Pakualaman	2018_04	13	11	84.6154
Rejowinangun	Kotagede	2018_04	22	0	0
Semaki	Umbulharjo	2018_04	88	13	14.7727
Sorosutan	Umbulharjo	2018_04	94	64	68.0851
Sosromenduran	Gedong Tengen	2018_04	119	94	78.9916
Suryatmajan	Danurejan	2018_04	101	89	88.1188
Suryodiningratan	Mantrijeron	2018_04	72	0	0
Tahunan	Umbulharjo	2018_04	53	11	20.7547
Tegal Panggung	Danurejan	2018_04	54	47	87.037
Tegalrejo	Tegalrejo	2018_04	54	53	98.1481
Terban	Gondokusuman	2018_04	68	62	91.1765
Warungboto	Umbulharjo	2018_04	81	77	95.0617
Wirobrajan	Wirobrajan	2018_04	77	76	98.7013
Wirogunan	Mergangsan	2018_04	98	88	89.7959
Baciro	Gondokusuman	2018_05	302	171	56.6225
Bausasran	Danurejan	2018_05	117	7	5.98291
Bener	Tegalrejo	2018_05	15	15	100
Brontokusuman	Mergangsan	2018_05	247	19	7.69231
Bumijo	Jetis	2018_05	55	10	18.1818
Cokrodiningratan	Jetis	2018_05	101	98	97.0297
Demangan	Gondokusuman	2018_05	84	4	4.7619
Gedongkiwo	Mantrijeron	2018_05	267	55	20.5993
Giwangan	Umbulharjo	2018_05	91	0	0
Gowongan	Jetis	2018_05	53	4	7.54717
Gunung Ketur	Pakualaman	2018_05	116	47	40.5172
Kadipaten	Kraton	2018_05	75	74	98.6667
Karangwaru	Tegalrejo	2018_05	26	25	96.1538
Keparakan	Mergangsan	2018_05	43	2	4.65116
Klitren	Gondokusuman	2018_05	49	17	34.6939
Kotabaru	Gondokusuman	2018_05	27	9	33.3333
Kricak	Tegalrejo	2018_05	22	22	100
Mantrijeron	Mantrijeron	2018_05	82	73	89.0244
Muja Muju	Umbulharjo	2018_05	204	189	92.6471
Ngampilan	Ngampilan	2018_05	12	3	25
Ngupasan	Gondomanan	2018_05	19	7	36.8421
Notoprajan	Ngampilan	2018_05	39	6	15.3846
Pakuncen	Wirobrajan	2018_05	65	65	100
Pandeyan	Umbulharjo	2018_05	127	2	1.5748
Panembahan	Kraton	2018_05	58	2	3.44828
Patangpuluhan	Wirobrajan	2018_05	29	29	100
Patehan	Kraton	2018_05	92	81	88.0435
Prawirodirjan	Gondomanan	2018_05	18	1	5.55556
Prenggan	Kotagede	2018_05	8	0
Pringgokusuman	Gedong Tengen	2018_05	51	50	98.0392
Purbayan	Kotagede	2018_05	10	0	0
Purwokinanti	Pakualaman	2018_05	38	10	26.3158
Rejowinangun	Kotagede	2018_05	10	0	0
Semaki	Umbulharjo	2018_05	129	57	44.186
Sorosutan	Umbulharjo	2018_05	95	66	69.4737
Sosromenduran	Gedong Tengen	2018_05	31	19	61.2903
Suryatmajan	Danurejan	2018_05	24	23	95.8333
Suryodiningratan	Mantrijeron	2018_05	174	5	2.87356
Tahunan	Umbulharjo	2018_05	88	27	30.6818
Tegal Panggung	Danurejan	2018_05	12	11	91.6667
Tegalrejo	Tegalrejo	2018_05	14	13	92.8571
Terban	Gondokusuman	2018_05	42	38	90.4762
Warungboto	Umbulharjo	2018_05	107	97	90.6542
Wirobrajan	Wirobrajan	2018_05	64	63	98.4375
Wirogunan	Mergangsan	2018_05	162	149	91.9753
Baciro	Gondokusuman	2018_06	0	0
Bausasran	Danurejan	2018_06	0	0
Bener	Tegalrejo	2018_06	15	13	86.6667
Brontokusuman	Mergangsan	2018_06	0	0
Bumijo	Jetis	2018_06	0	0
Cokrodiningratan	Jetis	2018_06	0	0
Demangan	Gondokusuman	2018_06	0	0
Gedongkiwo	Mantrijeron	2018_06	0	0
Giwangan	Umbulharjo	2018_06	0	0
Gowongan	Jetis	2018_06	0	0
Gunung Ketur	Pakualaman	2018_06	0	0
Kadipaten	Kraton	2018_06	0	0
Karangwaru	Tegalrejo	2018_06	57	57	100
Keparakan	Mergangsan	2018_06	0	0
Klitren	Gondokusuman	2018_06	0	0
Kotabaru	Gondokusuman	2018_06	0	0
Kricak	Tegalrejo	2018_06	20	17	85
Mantrijeron	Mantrijeron	2018_06	0	0
Muja Muju	Umbulharjo	2018_06	0	0
Ngampilan	Ngampilan	2018_06	0	0
Ngupasan	Gondomanan	2018_06	0	0
Notoprajan	Ngampilan	2018_06	0	0
Pakuncen	Wirobrajan	2018_06	45	43	95.5556
Pandeyan	Umbulharjo	2018_06	0	0
Panembahan	Kraton	2018_06	0	0
Patangpuluhan	Wirobrajan	2018_06	13	12	92.3077
Patehan	Kraton	2018_06	0	0
Prawirodirjan	Gondomanan	2018_06	0	0
Prenggan	Kotagede	2018_06	12	0	0
Pringgokusuman	Gedong Tengen	2018_06	0	0
Purbayan	Kotagede	2018_06	9	0
Purwokinanti	Pakualaman	2018_06	0	0
Rejowinangun	Kotagede	2018_06	8	0
Semaki	Umbulharjo	2018_06	0	0
Sorosutan	Umbulharjo	2018_06	0	0
Sosromenduran	Gedong Tengen	2018_06	0	0
Suryatmajan	Danurejan	2018_06	0	0
Suryodiningratan	Mantrijeron	2018_06	0	0
Tahunan	Umbulharjo	2018_06	0	0
Tegal Panggung	Danurejan	2018_06	0	0
Tegalrejo	Tegalrejo	2018_06	28	26	92.8571
Terban	Gondokusuman	2018_06	0	0
Warungboto	Umbulharjo	2018_06	0	0
Wirobrajan	Wirobrajan	2018_06	40	38	95
Wirogunan	Mergangsan	2018_06	0	0
Baciro	Gondokusuman	2018_07	156	99	63.4615
Bausasran	Danurejan	2018_07	85	5	5.88235
Bener	Tegalrejo	2018_07	12	12	100
Brontokusuman	Mergangsan	2018_07	80	7	8.75
Bumijo	Jetis	2018_07	108	10	9.25926
Cokrodiningratan	Jetis	2018_07	128	121	94.5312
Demangan	Gondokusuman	2018_07	84	3	3.57143
Gedongkiwo	Mantrijeron	2018_07	104	29	27.8846
Giwangan	Umbulharjo	2018_07	8	0
Gowongan	Jetis	2018_07	93	3	3.22581
Gunung Ketur	Pakualaman	2018_07	65	11	16.9231
Kadipaten	Kraton	2018_07	55	53	96.3636
Karangwaru	Tegalrejo	2018_07	35	32	91.4286
Keparakan	Mergangsan	2018_07	113	1	0.884956
Klitren	Gondokusuman	2018_07	77	29	37.6623
Kotabaru	Gondokusuman	2018_07	71	14	19.7183
Kricak	Tegalrejo	2018_07	42	42	100
Mantrijeron	Mantrijeron	2018_07	36	35	97.2222
Muja Muju	Umbulharjo	2018_07	151	141	93.3775
Ngampilan	Ngampilan	2018_07	30	9	30
Ngupasan	Gondomanan	2018_07	28	10	35.7143
Notoprajan	Ngampilan	2018_07	79	7	8.86076
Pakuncen	Wirobrajan	2018_07	88	87	98.8636
Pandeyan	Umbulharjo	2018_07	105	8	7.61905
Panembahan	Kraton	2018_07	98	9	9.18367
Patangpuluhan	Wirobrajan	2018_07	8	8
Patehan	Kraton	2018_07	25	24	96
Prawirodirjan	Gondomanan	2018_07	29	2	6.89655
Prenggan	Kotagede	2018_07	13	0	0
Pringgokusuman	Gedong Tengen	2018_07	99	94	94.9495
Purbayan	Kotagede	2018_07	20	0	0
Purwokinanti	Pakualaman	2018_07	39	30	76.9231
Rejowinangun	Kotagede	2018_07	9	0
Semaki	Umbulharjo	2018_07	97	51	52.5773
Sorosutan	Umbulharjo	2018_07	38	23	60.5263
Sosromenduran	Gedong Tengen	2018_07	96	84	87.5
Suryatmajan	Danurejan	2018_07	82	78	95.1219
Suryodiningratan	Mantrijeron	2018_07	135	6	4.44444
Tahunan	Umbulharjo	2018_07	104	23	22.1154
Tegal Panggung	Danurejan	2018_07	28	28	100
Tegalrejo	Tegalrejo	2018_07	23	22	95.6522
Terban	Gondokusuman	2018_07	92	84	91.3043
Warungboto	Umbulharjo	2018_07	71	66	92.9577
Wirobrajan	Wirobrajan	2018_07	72	71	98.6111
Wirogunan	Mergangsan	2018_07	110	100	90.9091
Baciro	Gondokusuman	2018_08	112	74	66.0714
Bausasran	Danurejan	2018_08	37	1	2.7027
Bener	Tegalrejo	2018_08	13	10	76.9231
Brontokusuman	Mergangsan	2018_08	102	16	15.6863
Bumijo	Jetis	2018_08	24	0	0
Cokrodiningratan	Jetis	2018_08	112	109	97.3214
Demangan	Gondokusuman	2018_08	34	1	2.94118
Gedongkiwo	Mantrijeron	2018_08	110	33	30
Giwangan	Umbulharjo	2018_08	23	0	0
Gowongan	Jetis	2018_08	19	1	5.26316
Gunung Ketur	Pakualaman	2018_08	17	6	35.2941
Kadipaten	Kraton	2018_08	85	77	90.5882
Karangwaru	Tegalrejo	2018_08	34	30	88.2353
Keparakan	Mergangsan	2018_08	34	1	2.94118
Klitren	Gondokusuman	2018_08	35	19	54.2857
Kotabaru	Gondokusuman	2018_08	17	3	17.6471
Kricak	Tegalrejo	2018_08	31	31	100
Mantrijeron	Mantrijeron	2018_08	95	80	84.2105
Muja Muju	Umbulharjo	2018_08	84	78	92.8571
Ngampilan	Ngampilan	2018_08	14	2	14.2857
Ngupasan	Gondomanan	2018_08	30	20	66.6667
Notoprajan	Ngampilan	2018_08	74	32	43.2432
Pakuncen	Wirobrajan	2018_08	29	27	93.1034
Pandeyan	Umbulharjo	2018_08	46	3	6.52174
Panembahan	Kraton	2018_08	36	1	2.77778
Patangpuluhan	Wirobrajan	2018_08	4	4
Patehan	Kraton	2018_08	40	34	85
Prawirodirjan	Gondomanan	2018_08	25	2	8
Prenggan	Kotagede	2018_08	13	0	0
Pringgokusuman	Gedong Tengen	2018_08	39	32	82.0513
Purbayan	Kotagede	2018_08	5	0
Purwokinanti	Pakualaman	2018_08	33	24	72.7273
Rejowinangun	Kotagede	2018_08	15	1	6.66667
Semaki	Umbulharjo	2018_08	35	19	54.2857
Sorosutan	Umbulharjo	2018_08	94	59	62.766
Sosromenduran	Gedong Tengen	2018_08	30	23	76.6667
Suryatmajan	Danurejan	2018_08	37	34	91.8919
Suryodiningratan	Mantrijeron	2018_08	87	3	3.44828
Tahunan	Umbulharjo	2018_08	37	4	10.8108
Tegal Panggung	Danurejan	2018_08	7	4
Tegalrejo	Tegalrejo	2018_08	14	13	92.8571
Terban	Gondokusuman	2018_08	26	23	88.4615
Warungboto	Umbulharjo	2018_08	28	23	82.1429
Wirobrajan	Wirobrajan	2018_08	45	42	93.3333
Wirogunan	Mergangsan	2018_08	83	52	62.6506
Baciro	Gondokusuman	2018_09	209	136	65.0718
Bausasran	Danurejan	2018_09	52	4	7.69231
Bener	Tegalrejo	2018_09	13	12	92.3077
Brontokusuman	Mergangsan	2018_09	142	22	15.493
Bumijo	Jetis	2018_09	34	0	0
Cokrodiningratan	Jetis	2018_09	188	156	82.9787
Demangan	Gondokusuman	2018_09	65	7	10.7692
Gedongkiwo	Mantrijeron	2018_09	131	35	26.7176
Giwangan	Umbulharjo	2018_09	21	0	0
Gowongan	Jetis	2018_09	82	3	3.65854
Gunung Ketur	Pakualaman	2018_09	28	5	17.8571
Kadipaten	Kraton	2018_09	46	38	82.6087
Karangwaru	Tegalrejo	2018_09	23	21	91.3043
Keparakan	Mergangsan	2018_09	76	0	0
Klitren	Gondokusuman	2018_09	81	43	53.0864
Kotabaru	Gondokusuman	2018_09	50	5	10
Kricak	Tegalrejo	2018_09	63	58	92.0635
Mantrijeron	Mantrijeron	2018_09	71	59	83.0986
Muja Muju	Umbulharjo	2018_09	140	115	82.1429
Ngampilan	Ngampilan	2018_09	35	9	25.7143
Ngupasan	Gondomanan	2018_09	28	12	42.8571
Notoprajan	Ngampilan	2018_09	119	41	34.4538
Pakuncen	Wirobrajan	2018_09	19	18	94.7368
Pandeyan	Umbulharjo	2018_09	60	0	0
Panembahan	Kraton	2018_09	56	4	7.14286
Patangpuluhan	Wirobrajan	2018_09	8	8
Patehan	Kraton	2018_09	41	33	80.4878
Prawirodirjan	Gondomanan	2018_09	44	0	0
Prenggan	Kotagede	2018_09	16	0	0
Pringgokusuman	Gedong Tengen	2018_09	154	132	85.7143
Purbayan	Kotagede	2018_09	6	0
Purwokinanti	Pakualaman	2018_09	32	23	71.875
Rejowinangun	Kotagede	2018_09	12	0	0
Semaki	Umbulharjo	2018_09	72	17	23.6111
Sorosutan	Umbulharjo	2018_09	107	85	79.4393
Sosromenduran	Gedong Tengen	2018_09	87	63	72.4138
Suryatmajan	Danurejan	2018_09	103	90	87.3786
Suryodiningratan	Mantrijeron	2018_09	56	1	1.78571
Tahunan	Umbulharjo	2018_09	92	14	15.2174
Tegal Panggung	Danurejan	2018_09	26	25	96.1538
Tegalrejo	Tegalrejo	2018_09	22	21	95.4545
Terban	Gondokusuman	2018_09	60	56	93.3333
Warungboto	Umbulharjo	2018_09	89	73	82.0225
Wirobrajan	Wirobrajan	2018_09	30	28	93.3333
Wirogunan	Mergangsan	2018_09	104	86	82.6923
Baciro	Gondokusuman	2018_10	131	103	78.626
Bausasran	Danurejan	2018_10	43	6	13.9535
Bener	Tegalrejo	2018_10	21	21	100
Brontokusuman	Mergangsan	2018_10	74	16	21.6216
Bumijo	Jetis	2018_10	34	2	5.88235
Cokrodiningratan	Jetis	2018_10	45	44	97.7778
Demangan	Gondokusuman	2018_10	34	12	35.2941
Gedongkiwo	Mantrijeron	2018_10	73	30	41.0959
Giwangan	Umbulharjo	2018_10	39	1	2.5641
Gowongan	Jetis	2018_10	26	5	19.2308
Gunung Ketur	Pakualaman	2018_10	25	11	44
Kadipaten	Kraton	2018_10	54	53	98.1481
Karangwaru	Tegalrejo	2018_10	26	26	100
Keparakan	Mergangsan	2018_10	47	2	4.25532
Klitren	Gondokusuman	2018_10	36	15	41.6667
Kotabaru	Gondokusuman	2018_10	20	1	5
Kricak	Tegalrejo	2018_10	36	35	97.2222
Mantrijeron	Mantrijeron	2018_10	62	55	88.7097
Muja Muju	Umbulharjo	2018_10	138	133	96.3768
Ngampilan	Ngampilan	2018_10	36	22	61.1111
Ngupasan	Gondomanan	2018_10	26	22	84.6154
Notoprajan	Ngampilan	2018_10	35	14	40
Pakuncen	Wirobrajan	2018_10	45	43	95.5556
Pandeyan	Umbulharjo	2018_10	55	1	1.81818
Panembahan	Kraton	2018_10	54	4	7.40741
Patangpuluhan	Wirobrajan	2018_10	20	19	95
Patehan	Kraton	2018_10	29	27	93.1034
Prawirodirjan	Gondomanan	2018_10	19	1	5.26316
Prenggan	Kotagede	2018_10	10	0	0
Pringgokusuman	Gedong Tengen	2018_10	50	50	100
Purbayan	Kotagede	2018_10	15	0	0
Purwokinanti	Pakualaman	2018_10	24	11	45.8333
Rejowinangun	Kotagede	2018_10	23	1	4.34783
Semaki	Umbulharjo	2018_10	131	22	16.7939
Sorosutan	Umbulharjo	2018_10	88	66	75
Sosromenduran	Gedong Tengen	2018_10	55	41	74.5455
Suryatmajan	Danurejan	2018_10	85	84	98.8235
Suryodiningratan	Mantrijeron	2018_10	29	4	13.7931
Tahunan	Umbulharjo	2018_10	56	10	17.8571
Tegal Panggung	Danurejan	2018_10	16	16	100
Tegalrejo	Tegalrejo	2018_10	15	15	100
Terban	Gondokusuman	2018_10	28	23	82.1429
Warungboto	Umbulharjo	2018_10	47	44	93.617
Wirobrajan	Wirobrajan	2018_10	38	37	97.3684
Wirogunan	Mergangsan	2018_10	64	61	95.3125
Baciro	Gondokusuman	2018_11	186	146	78.4946
Bausasran	Danurejan	2018_11	89	4	4.49438
Bener	Tegalrejo	2018_11	10	10	100
Brontokusuman	Mergangsan	2018_11	204	63	30.8824
Bumijo	Jetis	2018_11	48	4	8.33333
Cokrodiningratan	Jetis	2018_11	57	49	85.9649
Demangan	Gondokusuman	2018_11	74	3	4.05405
Gedongkiwo	Mantrijeron	2018_11	163	49	30.0613
Giwangan	Umbulharjo	2018_11	27	0	0
Gowongan	Jetis	2018_11	55	1	1.81818
Gunung Ketur	Pakualaman	2018_11	31	16	51.6129
Kadipaten	Kraton	2018_11	54	54	100
Karangwaru	Tegalrejo	2018_11	29	26	89.6552
Keparakan	Mergangsan	2018_11	79	4	5.06329
Klitren	Gondokusuman	2018_11	39	26	66.6667
Kotabaru	Gondokusuman	2018_11	22	8	36.3636
Kricak	Tegalrejo	2018_11	41	40	97.561
Mantrijeron	Mantrijeron	2018_11	90	85	94.4444
Muja Muju	Umbulharjo	2018_11	171	168	98.2456
Ngampilan	Ngampilan	2018_11	14	2	14.2857
Ngupasan	Gondomanan	2018_11	37	32	86.4865
Notoprajan	Ngampilan	2018_11	93	26	27.957
Pakuncen	Wirobrajan	2018_11	21	18	85.7143
Pandeyan	Umbulharjo	2018_11	111	9	8.10811
Panembahan	Kraton	2018_11	88	7	7.95455
Patangpuluhan	Wirobrajan	2018_11	4	4
Patehan	Kraton	2018_11	62	62	100
Prawirodirjan	Gondomanan	2018_11	27	0	0
Prenggan	Kotagede	2018_11	22	0	0
Pringgokusuman	Gedong Tengen	2018_11	43	37	86.0465
Purbayan	Kotagede	2018_11	22	0	0
Purwokinanti	Pakualaman	2018_11	9	2
Rejowinangun	Kotagede	2018_11	22	0	0
Semaki	Umbulharjo	2018_11	53	17	32.0755
Sorosutan	Umbulharjo	2018_11	95	62	65.2632
Sosromenduran	Gedong Tengen	2018_11	29	18	62.069
Suryatmajan	Danurejan	2018_11	55	54	98.1818
Suryodiningratan	Mantrijeron	2018_11	104	6	5.76923
Tahunan	Umbulharjo	2018_11	86	20	23.2558
Tegal Panggung	Danurejan	2018_11	16	15	93.75
Tegalrejo	Tegalrejo	2018_11	19	17	89.4737
Terban	Gondokusuman	2018_11	30	28	93.3333
Warungboto	Umbulharjo	2018_11	67	63	94.0299
Wirobrajan	Wirobrajan	2018_11	63	62	98.4127
Wirogunan	Mergangsan	2018_11	72	64	88.8889
Baciro	Gondokusuman	2018_12	348	227	65.2299
Bausasran	Danurejan	2018_12	103	4	3.8835
Bener	Tegalrejo	2018_12	20	19	95
Brontokusuman	Mergangsan	2018_12	198	34	17.1717
Bumijo	Jetis	2018_12	88	5	5.68182
Cokrodiningratan	Jetis	2018_12	129	121	93.7984
Demangan	Gondokusuman	2018_12	170	31	18.2353
Gedongkiwo	Mantrijeron	2018_12	282	116	41.1348
Giwangan	Umbulharjo	2018_12	65	0	0
Gowongan	Jetis	2018_12	125	11	8.8
Gunung Ketur	Pakualaman	2018_12	71	29	40.8451
Kadipaten	Kraton	2018_12	92	91	98.913
Karangwaru	Tegalrejo	2018_12	62	58	93.5484
Keparakan	Mergangsan	2018_12	115	14	12.1739
Klitren	Gondokusuman	2018_12	81	58	71.6049
Kotabaru	Gondokusuman	2018_12	105	32	30.4762
Kricak	Tegalrejo	2018_12	56	55	98.2143
Mantrijeron	Mantrijeron	2018_12	106	99	93.3962
Muja Muju	Umbulharjo	2018_12	231	217	93.9394
Ngampilan	Ngampilan	2018_12	36	19	52.7778
Ngupasan	Gondomanan	2018_12	73	71	97.2603
Notoprajan	Ngampilan	2018_12	151	28	18.543
Pakuncen	Wirobrajan	2018_12	66	61	92.4242
Pandeyan	Umbulharjo	2018_12	127	8	6.29921
Panembahan	Kraton	2018_12	138	22	15.942
Patangpuluhan	Wirobrajan	2018_12	17	16	94.1176
Patehan	Kraton	2018_12	196	190	96.9388
Prawirodirjan	Gondomanan	2018_12	33	0	0
Prenggan	Kotagede	2018_12	22	0	0
Pringgokusuman	Gedong Tengen	2018_12	82	80	97.561
Purbayan	Kotagede	2018_12	9	0
Purwokinanti	Pakualaman	2018_12	62	41	66.129
Rejowinangun	Kotagede	2018_12	31	0	0
Semaki	Umbulharjo	2018_12	70	60	85.7143
Sorosutan	Umbulharjo	2018_12	163	113	69.3252
Sosromenduran	Gedong Tengen	2018_12	66	49	74.2424
Suryatmajan	Danurejan	2018_12	76	73	96.0526
Suryodiningratan	Mantrijeron	2018_12	172	11	6.39535
Tahunan	Umbulharjo	2018_12	107	24	22.4299
Tegal Panggung	Danurejan	2018_12	70	67	95.7143
Tegalrejo	Tegalrejo	2018_12	52	41	78.8462
Terban	Gondokusuman	2018_12	81	75	92.5926
Warungboto	Umbulharjo	2018_12	117	111	94.8718
Wirobrajan	Wirobrajan	2018_12	64	59	92.1875
Wirogunan	Mergangsan	2018_12	114	108	94.7368
Baciro	Gondokusuman	2019_01	199	133	66.8342
Bausasran	Danurejan	2019_01	51	5	9.80392
Bener	Tegalrejo	2019_01	46	42	91.3043
Brontokusuman	Mergangsan	2019_01	160	25	15.625
Bumijo	Jetis	2019_01	128	12	9.375
Cokrodiningratan	Jetis	2019_01	84	80	95.2381
Demangan	Gondokusuman	2019_01	76	18	23.6842
Gedongkiwo	Mantrijeron	2019_01	153	45	29.4118
Giwangan	Umbulharjo	2019_01	50	0	0
Gowongan	Jetis	2019_01	97	26	26.8041
Gunung Ketur	Pakualaman	2019_01	18	12	66.6667
Kadipaten	Kraton	2019_01	95	90	94.7368
Karangwaru	Tegalrejo	2019_01	115	104	90.4348
Keparakan	Mergangsan	2019_01	136	8	5.88235
Klitren	Gondokusuman	2019_01	76	57	75
Kotabaru	Gondokusuman	2019_01	77	31	40.2597
Kricak	Tegalrejo	2019_01	151	147	97.351
Mantrijeron	Mantrijeron	2019_01	101	94	93.0693
Muja Muju	Umbulharjo	2019_01	220	215	97.7273
Ngampilan	Ngampilan	2019_01	31	12	38.7097
Ngupasan	Gondomanan	2019_01	69	55	79.7101
Notoprajan	Ngampilan	2019_01	108	13	12.037
Pakuncen	Wirobrajan	2019_01	132	132	100
Pandeyan	Umbulharjo	2019_01	113	13	11.5044
Panembahan	Kraton	2019_01	70	11	15.7143
Patangpuluhan	Wirobrajan	2019_01	34	33	97.0588
Patehan	Kraton	2019_01	52	51	98.0769
Prawirodirjan	Gondomanan	2019_01	59	2	3.38983
Prenggan	Kotagede	2019_01	50	0	0
Pringgokusuman	Gedong Tengen	2019_01	78	74	94.8718
Purbayan	Kotagede	2019_01	24	0	0
Purwokinanti	Pakualaman	2019_01	40	23	57.5
Rejowinangun	Kotagede	2019_01	64	1	1.5625
Semaki	Umbulharjo	2019_01	73	34	46.5753
Sorosutan	Umbulharjo	2019_01	163	133	81.5951
Sosromenduran	Gedong Tengen	2019_01	57	41	71.9298
Suryatmajan	Danurejan	2019_01	32	31	96.875
Suryodiningratan	Mantrijeron	2019_01	72	4	5.55556
Tahunan	Umbulharjo	2019_01	91	34	37.3626
Tegal Panggung	Danurejan	2019_01	54	54	100
Tegalrejo	Tegalrejo	2019_01	104	100	96.1538
Terban	Gondokusuman	2019_01	78	77	98.7179
Warungboto	Umbulharjo	2019_01	59	51	86.4407
Wirobrajan	Wirobrajan	2019_01	282	277	98.227
Wirogunan	Mergangsan	2019_01	103	95	92.233
Baciro	Gondokusuman	2019_02	204	127	62.2549
Bausasran	Danurejan	2019_02	70	19	27.1429
Bener	Tegalrejo	2019_02	22	21	95.4545
Brontokusuman	Mergangsan	2019_02	211	29	13.7441
Bumijo	Jetis	2019_02	51	5	9.80392
Cokrodiningratan	Jetis	2019_02	109	108	99.0826
Demangan	Gondokusuman	2019_02	72	27	37.5
Gedongkiwo	Mantrijeron	2019_02	178	39	21.9101
Giwangan	Umbulharjo	2019_02	76	1	1.31579
Gowongan	Jetis	2019_02	66	5	7.57576
Gunung Ketur	Pakualaman	2019_02	34	15	44.1176
Kadipaten	Kraton	2019_02	35	35	100
Karangwaru	Tegalrejo	2019_02	41	40	97.561
Keparakan	Mergangsan	2019_02	69	8	11.5942
Klitren	Gondokusuman	2019_02	54	30	55.5556
Kotabaru	Gondokusuman	2019_02	51	37	72.549
Kricak	Tegalrejo	2019_02	59	57	96.6102
Mantrijeron	Mantrijeron	2019_02	57	52	91.2281
Muja Muju	Umbulharjo	2019_02	143	134	93.7063
Ngampilan	Ngampilan	2019_02	31	9	29.0323
Ngupasan	Gondomanan	2019_02	37	19	51.3514
Notoprajan	Ngampilan	2019_02	81	43	53.0864
Pakuncen	Wirobrajan	2019_02	88	84	95.4545
Pandeyan	Umbulharjo	2019_02	88	3	3.40909
Panembahan	Kraton	2019_02	108	10	9.25926
Patangpuluhan	Wirobrajan	2019_02	18	17	94.4444
Patehan	Kraton	2019_02	30	30	100
Prawirodirjan	Gondomanan	2019_02	47	2	4.25532
Prenggan	Kotagede	2019_02	43	0	0
Pringgokusuman	Gedong Tengen	2019_02	39	39	100
Purbayan	Kotagede	2019_02	10	1	10
Purwokinanti	Pakualaman	2019_02	47	41	87.234
Rejowinangun	Kotagede	2019_02	25	1	4
Semaki	Umbulharjo	2019_02	77	43	55.8442
Sorosutan	Umbulharjo	2019_02	128	97	75.7812
Sosromenduran	Gedong Tengen	2019_02	86	66	76.7442
Suryatmajan	Danurejan	2019_02	42	41	97.619
Suryodiningratan	Mantrijeron	2019_02	59	6	10.1695
Tahunan	Umbulharjo	2019_02	123	60	48.7805
Tegal Panggung	Danurejan	2019_02	49	48	97.9592
Tegalrejo	Tegalrejo	2019_02	48	44	91.6667
Terban	Gondokusuman	2019_02	50	48	96
Warungboto	Umbulharjo	2019_02	71	58	81.6901
Wirobrajan	Wirobrajan	2019_02	115	114	99.1304
Wirogunan	Mergangsan	2019_02	105	101	96.1905
Baciro	Gondokusuman	2019_03	206	184	89.3204
Bausasran	Danurejan	2019_03	46	9	19.5652
Bener	Tegalrejo	2019_03	15	15	100
Brontokusuman	Mergangsan	2019_03	194	50	25.7732
Bumijo	Jetis	2019_03	92	12	13.0435
Cokrodiningratan	Jetis	2019_03	110	109	99.0909
Demangan	Gondokusuman	2019_03	100	21	21
Gedongkiwo	Mantrijeron	2019_03	157	30	19.1083
Giwangan	Umbulharjo	2019_03	75	2	2.66667
Gowongan	Jetis	2019_03	52	3	5.76923
Gunung Ketur	Pakualaman	2019_03	43	17	39.5349
Kadipaten	Kraton	2019_03	19	18	94.7368
Karangwaru	Tegalrejo	2019_03	34	34	100
Keparakan	Mergangsan	2019_03	118	8	6.77966
Klitren	Gondokusuman	2019_03	63	39	61.9048
Kotabaru	Gondokusuman	2019_03	58	30	51.7241
Kricak	Tegalrejo	2019_03	17	16	94.1176
Mantrijeron	Mantrijeron	2019_03	46	43	93.4783
Muja Muju	Umbulharjo	2019_03	181	174	96.1326
Ngampilan	Ngampilan	2019_03	36	19	52.7778
Ngupasan	Gondomanan	2019_03	44	24	54.5455
Notoprajan	Ngampilan	2019_03	130	74	56.9231
Pakuncen	Wirobrajan	2019_03	47	45	95.7447
Pandeyan	Umbulharjo	2019_03	83	4	4.81928
Panembahan	Kraton	2019_03	91	14	15.3846
Patangpuluhan	Wirobrajan	2019_03	19	19	100
Patehan	Kraton	2019_03	61	54	88.5246
Prawirodirjan	Gondomanan	2019_03	26	2	7.69231
Prenggan	Kotagede	2019_03	31	1	3.22581
Pringgokusuman	Gedong Tengen	2019_03	50	50	100
Purbayan	Kotagede	2019_03	16	0	0
Purwokinanti	Pakualaman	2019_03	27	17	62.963
Rejowinangun	Kotagede	2019_03	17	0	0
Semaki	Umbulharjo	2019_03	88	43	48.8636
Sorosutan	Umbulharjo	2019_03	124	87	70.1613
Sosromenduran	Gedong Tengen	2019_03	70	54	77.1429
Suryatmajan	Danurejan	2019_03	55	55	100
Suryodiningratan	Mantrijeron	2019_03	53	3	5.66038
Tahunan	Umbulharjo	2019_03	142	104	73.2394
Tegal Panggung	Danurejan	2019_03	37	35	94.5946
Tegalrejo	Tegalrejo	2019_03	20	20	100
Terban	Gondokusuman	2019_03	42	42	100
Warungboto	Umbulharjo	2019_03	53	50	94.3396
Wirobrajan	Wirobrajan	2019_03	53	52	98.1132
Wirogunan	Mergangsan	2019_03	119	116	97.479
Baciro	Gondokusuman	2019_04	208	152	73.0769
Bausasran	Danurejan	2019_04	32	1	3.125
Bener	Tegalrejo	2019_04	22	21	95.4545
Brontokusuman	Mergangsan	2019_04	141	15	10.6383
Bumijo	Jetis	2019_04	93	13	13.9785
Cokrodiningratan	Jetis	2019_04	87	86	98.8506
Demangan	Gondokusuman	2019_04	128	38	29.6875
Gedongkiwo	Mantrijeron	2019_04	188	67	35.6383
Giwangan	Umbulharjo	2019_04	10	0	0
Gowongan	Jetis	2019_04	66	8	12.1212
Gunung Ketur	Pakualaman	2019_04	22	20	90.9091
Kadipaten	Kraton	2019_04	22	22	100
Karangwaru	Tegalrejo	2019_04	95	91	95.7895
Keparakan	Mergangsan	2019_04	161	12	7.45342
Klitren	Gondokusuman	2019_04	50	26	52
Kotabaru	Gondokusuman	2019_04	36	19	52.7778
Kricak	Tegalrejo	2019_04	30	30	100
Mantrijeron	Mantrijeron	2019_04	58	58	100
Muja Muju	Umbulharjo	2019_04	173	169	97.6879
Ngampilan	Ngampilan	2019_04	34	18	52.9412
Ngupasan	Gondomanan	2019_04	46	17	36.9565
Notoprajan	Ngampilan	2019_04	74	38	51.3514
Pakuncen	Wirobrajan	2019_04	26	26	100
Pandeyan	Umbulharjo	2019_04	89	11	12.3596
Panembahan	Kraton	2019_04	79	8	10.1266
Patangpuluhan	Wirobrajan	2019_04	31	30	96.7742
Patehan	Kraton	2019_04	105	101	96.1905
Prawirodirjan	Gondomanan	2019_04	36	1	2.77778
Prenggan	Kotagede	2019_04	44	0	0
Pringgokusuman	Gedong Tengen	2019_04	40	39	97.5
Purbayan	Kotagede	2019_04	30	0	0
Purwokinanti	Pakualaman	2019_04	23	9	39.1304
Rejowinangun	Kotagede	2019_04	30	1	3.33333
Semaki	Umbulharjo	2019_04	53	42	79.2453
Sorosutan	Umbulharjo	2019_04	136	102	75
Sosromenduran	Gedong Tengen	2019_04	99	86	86.8687
Suryatmajan	Danurejan	2019_04	77	76	98.7013
Suryodiningratan	Mantrijeron	2019_04	85	4	4.70588
Tahunan	Umbulharjo	2019_04	131	81	61.8321
Tegal Panggung	Danurejan	2019_04	62	62	100
Tegalrejo	Tegalrejo	2019_04	40	37	92.5
Terban	Gondokusuman	2019_04	55	55	100
Warungboto	Umbulharjo	2019_04	125	122	97.6
Wirobrajan	Wirobrajan	2019_04	58	55	94.8276
Wirogunan	Mergangsan	2019_04	115	111	96.5217
Baciro	Gondokusuman	2019_05	108	98	90.7407
Bausasran	Danurejan	2019_05	27	5	18.5185
Bener	Tegalrejo	2019_05	13	13	100
Brontokusuman	Mergangsan	2019_05	102	20	19.6078
Bumijo	Jetis	2019_05	30	5	16.6667
Cokrodiningratan	Jetis	2019_05	51	48	94.1176
Demangan	Gondokusuman	2019_05	90	22	24.4444
Gedongkiwo	Mantrijeron	2019_05	206	53	25.7282
Giwangan	Umbulharjo	2019_05	51	2	3.92157
Gowongan	Jetis	2019_05	40	8	20
Gunung Ketur	Pakualaman	2019_05	53	29	54.717
Kadipaten	Kraton	2019_05	26	26	100
Karangwaru	Tegalrejo	2019_05	58	56	96.5517
Keparakan	Mergangsan	2019_05	184	11	5.97826
Klitren	Gondokusuman	2019_05	38	13	34.2105
Kotabaru	Gondokusuman	2019_05	30	15	50
Kricak	Tegalrejo	2019_05	70	70	100
Mantrijeron	Mantrijeron	2019_05	63	61	96.8254
Muja Muju	Umbulharjo	2019_05	137	136	99.2701
Ngampilan	Ngampilan	2019_05	28	17	60.7143
Ngupasan	Gondomanan	2019_05	53	13	24.5283
Notoprajan	Ngampilan	2019_05	60	30	50
Pakuncen	Wirobrajan	2019_05	58	57	98.2759
Pandeyan	Umbulharjo	2019_05	75	12	16
Panembahan	Kraton	2019_05	66	9	13.6364
Patangpuluhan	Wirobrajan	2019_05	19	18	94.7368
Patehan	Kraton	2019_05	82	80	97.561
Prawirodirjan	Gondomanan	2019_05	38	3	7.89474
Prenggan	Kotagede	2019_05	38	0	0
Pringgokusuman	Gedong Tengen	2019_05	65	64	98.4615
Purbayan	Kotagede	2019_05	29	0	0
Purwokinanti	Pakualaman	2019_05	29	23	79.3103
Rejowinangun	Kotagede	2019_05	31	0	0
Semaki	Umbulharjo	2019_05	52	22	42.3077
Sorosutan	Umbulharjo	2019_05	99	79	79.798
Sosromenduran	Gedong Tengen	2019_05	57	50	87.7193
Suryatmajan	Danurejan	2019_05	57	54	94.7368
Suryodiningratan	Mantrijeron	2019_05	81	2	2.46914
Tahunan	Umbulharjo	2019_05	72	33	45.8333
Tegal Panggung	Danurejan	2019_05	14	14	100
Tegalrejo	Tegalrejo	2019_05	46	37	80.4348
Terban	Gondokusuman	2019_05	41	36	87.8049
Warungboto	Umbulharjo	2019_05	47	44	93.617
Wirobrajan	Wirobrajan	2019_05	140	139	99.2857
Wirogunan	Mergangsan	2019_05	97	92	94.8454
Baciro	Gondokusuman	2019_06	94	81	86.1702
Bausasran	Danurejan	2019_06	18	4	22.2222
Bener	Tegalrejo	2019_06	22	20	90.9091
Brontokusuman	Mergangsan	2019_06	80	31	38.75
Bumijo	Jetis	2019_06	23	3	13.0435
Cokrodiningratan	Jetis	2019_06	63	61	96.8254
Demangan	Gondokusuman	2019_06	20	1	5
Gedongkiwo	Mantrijeron	2019_06	78	32	41.0256
Giwangan	Umbulharjo	2019_06	18	0	0
Gowongan	Jetis	2019_06	36	6	16.6667
Gunung Ketur	Pakualaman	2019_06	18	5	27.7778
Kadipaten	Kraton	2019_06	9	9
Karangwaru	Tegalrejo	2019_06	65	63	96.9231
Keparakan	Mergangsan	2019_06	56	2	3.57143
Klitren	Gondokusuman	2019_06	22	15	68.1818
Kotabaru	Gondokusuman	2019_06	23	11	47.8261
Kricak	Tegalrejo	2019_06	55	53	96.3636
Mantrijeron	Mantrijeron	2019_06	16	16	100
Muja Muju	Umbulharjo	2019_06	55	53	96.3636
Ngampilan	Ngampilan	2019_06	8	6
Ngupasan	Gondomanan	2019_06	24	4	16.6667
Notoprajan	Ngampilan	2019_06	54	36	66.6667
Pakuncen	Wirobrajan	2019_06	54	53	98.1481
Pandeyan	Umbulharjo	2019_06	43	6	13.9535
Panembahan	Kraton	2019_06	37	8	21.6216
Patangpuluhan	Wirobrajan	2019_06	9	9
Patehan	Kraton	2019_06	19	19	100
Prawirodirjan	Gondomanan	2019_06	40	0	0
Prenggan	Kotagede	2019_06	28	0	0
Pringgokusuman	Gedong Tengen	2019_06	10	8	80
Purbayan	Kotagede	2019_06	13	0	0
Purwokinanti	Pakualaman	2019_06	14	12	85.7143
Rejowinangun	Kotagede	2019_06	25	0	0
Semaki	Umbulharjo	2019_06	47	20	42.5532
Sorosutan	Umbulharjo	2019_06	62	45	72.5806
Sosromenduran	Gedong Tengen	2019_06	70	67	95.7143
Suryatmajan	Danurejan	2019_06	47	47	100
Suryodiningratan	Mantrijeron	2019_06	36	3	8.33333
Tahunan	Umbulharjo	2019_06	81	46	56.7901
Tegal Panggung	Danurejan	2019_06	8	8
Tegalrejo	Tegalrejo	2019_06	25	24	96
Terban	Gondokusuman	2019_06	32	29	90.625
Warungboto	Umbulharjo	2019_06	25	23	92
Wirobrajan	Wirobrajan	2019_06	74	74	100
Wirogunan	Mergangsan	2019_06	47	41	87.234
Baciro	Gondokusuman	2019_07	92	87	94.5652
Bausasran	Danurejan	2019_07	15	6	40
Bener	Tegalrejo	2019_07	0	0
Brontokusuman	Mergangsan	2019_07	74	17	22.973
Bumijo	Jetis	2019_07	22	12	54.5455
Cokrodiningratan	Jetis	2019_07	45	42	93.3333
Demangan	Gondokusuman	2019_07	55	6	10.9091
Gedongkiwo	Mantrijeron	2019_07	88	33	37.5
Giwangan	Umbulharjo	2019_07	20	0	0
Gowongan	Jetis	2019_07	46	18	39.1304
Gunung Ketur	Pakualaman	2019_07	10	6	60
Kadipaten	Kraton	2019_07	5	5
Karangwaru	Tegalrejo	2019_07	0	0
Keparakan	Mergangsan	2019_07	28	3	10.7143
Klitren	Gondokusuman	2019_07	35	20	57.1429
Kotabaru	Gondokusuman	2019_07	11	6	54.5455
Kricak	Tegalrejo	2019_07	0	0
Mantrijeron	Mantrijeron	2019_07	19	17	89.4737
Muja Muju	Umbulharjo	2019_07	49	48	97.9592
Ngampilan	Ngampilan	2019_07	13	3	23.0769
Ngupasan	Gondomanan	2019_07	18	8	44.4444
Notoprajan	Ngampilan	2019_07	25	17	68
Pakuncen	Wirobrajan	2019_07	0	0
Pandeyan	Umbulharjo	2019_07	51	9	17.6471
Panembahan	Kraton	2019_07	25	3	12
Patangpuluhan	Wirobrajan	2019_07	0	0
Patehan	Kraton	2019_07	25	25	100
Prawirodirjan	Gondomanan	2019_07	18	2	11.1111
Prenggan	Kotagede	2019_07	0	0
Pringgokusuman	Gedong Tengen	2019_07	36	36	100
Purbayan	Kotagede	2019_07	0	0
Purwokinanti	Pakualaman	2019_07	9	8
Rejowinangun	Kotagede	2019_07	0	0
Semaki	Umbulharjo	2019_07	30	13	43.3333
Sorosutan	Umbulharjo	2019_07	54	40	74.0741
Sosromenduran	Gedong Tengen	2019_07	46	45	97.8261
Suryatmajan	Danurejan	2019_07	28	28	100
Suryodiningratan	Mantrijeron	2019_07	45	3	6.66667
Tahunan	Umbulharjo	2019_07	28	7	25
Tegal Panggung	Danurejan	2019_07	7	7
Tegalrejo	Tegalrejo	2019_07	0	0
Terban	Gondokusuman	2019_07	23	23	100
Warungboto	Umbulharjo	2019_07	14	14	100
Wirobrajan	Wirobrajan	2019_07	0	0
Wirogunan	Mergangsan	2019_07	40	39	97.5
Baciro	Gondokusuman	2019_08	114	97	85.0877
Bausasran	Danurejan	2019_08	9	1
Bener	Tegalrejo	2019_08	0	0
Brontokusuman	Mergangsan	2019_08	94	18	19.1489
Bumijo	Jetis	2019_08	28	12	42.8571
Cokrodiningratan	Jetis	2019_08	25	25	100
Demangan	Gondokusuman	2019_08	72	30	41.6667
Gedongkiwo	Mantrijeron	2019_08	68	22	32.3529
Giwangan	Umbulharjo	2019_08	21	0	0
Gowongan	Jetis	2019_08	29	13	44.8276
Gunung Ketur	Pakualaman	2019_08	27	11	40.7407
Kadipaten	Kraton	2019_08	6	6
Karangwaru	Tegalrejo	2019_08	0	0
Keparakan	Mergangsan	2019_08	38	0	0
Klitren	Gondokusuman	2019_08	37	17	45.9459
Kotabaru	Gondokusuman	2019_08	18	10	55.5556
Kricak	Tegalrejo	2019_08	0	0
Mantrijeron	Mantrijeron	2019_08	19	18	94.7368
Muja Muju	Umbulharjo	2019_08	67	67	100
Ngampilan	Ngampilan	2019_08	22	10	45.4545
Ngupasan	Gondomanan	2019_08	18	10	55.5556
Notoprajan	Ngampilan	2019_08	45	27	60
Pakuncen	Wirobrajan	2019_08	0	0
Pandeyan	Umbulharjo	2019_08	51	4	7.84314
Panembahan	Kraton	2019_08	43	11	25.5814
Patangpuluhan	Wirobrajan	2019_08	0	0
Patehan	Kraton	2019_08	44	44	100
Prawirodirjan	Gondomanan	2019_08	16	4	25
Prenggan	Kotagede	2019_08	0	0
Pringgokusuman	Gedong Tengen	2019_08	23	23	100
Purbayan	Kotagede	2019_08	0	0
Purwokinanti	Pakualaman	2019_08	17	14	82.3529
Rejowinangun	Kotagede	2019_08	0	0
Semaki	Umbulharjo	2019_08	50	25	50
Sorosutan	Umbulharjo	2019_08	88	61	69.3182
Sosromenduran	Gedong Tengen	2019_08	59	58	98.3051
Suryatmajan	Danurejan	2019_08	23	23	100
Suryodiningratan	Mantrijeron	2019_08	63	5	7.93651
Tahunan	Umbulharjo	2019_08	44	18	40.9091
Tegal Panggung	Danurejan	2019_08	12	12	100
Tegalrejo	Tegalrejo	2019_08	0	0
Terban	Gondokusuman	2019_08	55	53	96.3636
Warungboto	Umbulharjo	2019_08	10	9	90
Wirobrajan	Wirobrajan	2019_08	0	0
Wirogunan	Mergangsan	2019_08	62	60	96.7742
Baciro	Gondokusuman	2019_09	94	81	86.1702
Bausasran	Danurejan	2019_09	15	4	26.6667
Bener	Tegalrejo	2019_09	7	7
Brontokusuman	Mergangsan	2019_09	83	30	36.1446
Bumijo	Jetis	2019_09	28	9	32.1429
Cokrodiningratan	Jetis	2019_09	52	49	94.2308
Demangan	Gondokusuman	2019_09	15	3	20
Gedongkiwo	Mantrijeron	2019_09	82	23	28.0488
Giwangan	Umbulharjo	2019_09	5	0
Gowongan	Jetis	2019_09	49	31	63.2653
Gunung Ketur	Pakualaman	2019_09	30	16	53.3333
Kadipaten	Kraton	2019_09	32	32	100
Karangwaru	Tegalrejo	2019_09	40	40	100
Keparakan	Mergangsan	2019_09	37	6	16.2162
Klitren	Gondokusuman	2019_09	30	8	26.6667
Kotabaru	Gondokusuman	2019_09	19	13	68.4211
Kricak	Tegalrejo	2019_09	30	30	100
Mantrijeron	Mantrijeron	2019_09	21	21	100
Muja Muju	Umbulharjo	2019_09	54	54	100
Ngampilan	Ngampilan	2019_09	17	13	76.4706
Ngupasan	Gondomanan	2019_09	53	27	50.9434
Notoprajan	Ngampilan	2019_09	19	11	57.8947
Pakuncen	Wirobrajan	2019_09	11	11	100
Pandeyan	Umbulharjo	2019_09	19	4	21.0526
Panembahan	Kraton	2019_09	63	11	17.4603
Patangpuluhan	Wirobrajan	2019_09	1	1
Patehan	Kraton	2019_09	48	48	100
Prawirodirjan	Gondomanan	2019_09	26	2	7.69231
Prenggan	Kotagede	2019_09	7	0
Pringgokusuman	Gedong Tengen	2019_09	47	47	100
Purbayan	Kotagede	2019_09	2	0
Purwokinanti	Pakualaman	2019_09	15	15	100
Rejowinangun	Kotagede	2019_09	15	0	0
Semaki	Umbulharjo	2019_09	36	29	80.5556
Sorosutan	Umbulharjo	2019_09	58	50	86.2069
Sosromenduran	Gedong Tengen	2019_09	38	34	89.4737
Suryatmajan	Danurejan	2019_09	26	26	100
Suryodiningratan	Mantrijeron	2019_09	67	7	10.4478
Tahunan	Umbulharjo	2019_09	49	19	38.7755
Tegal Panggung	Danurejan	2019_09	10	9	90
Tegalrejo	Tegalrejo	2019_09	3	3
Terban	Gondokusuman	2019_09	62	62	100
Warungboto	Umbulharjo	2019_09	35	35	100
Wirobrajan	Wirobrajan	2019_09	14	14	100
Wirogunan	Mergangsan	2019_09	64	63	98.4375
Baciro	Gondokusuman	2019_10	108	98	90.7407
Bausasran	Danurejan	2019_10	28	2	7.14286
Bener	Tegalrejo	2019_10	0	0
Brontokusuman	Mergangsan	2019_10	49	21	42.8571
Bumijo	Jetis	2019_10	40	15	37.5
Cokrodiningratan	Jetis	2019_10	56	56	100
Demangan	Gondokusuman	2019_10	76	11	14.4737
Gedongkiwo	Mantrijeron	2019_10	64	20	31.25
Giwangan	Umbulharjo	2019_10	9	0
Gowongan	Jetis	2019_10	44	23	52.2727
Gunung Ketur	Pakualaman	2019_10	29	9	31.0345
Kadipaten	Kraton	2019_10	11	10	90.9091
Karangwaru	Tegalrejo	2019_10	0	0
Keparakan	Mergangsan	2019_10	26	1	3.84615
Klitren	Gondokusuman	2019_10	30	16	53.3333
Kotabaru	Gondokusuman	2019_10	19	17	89.4737
Kricak	Tegalrejo	2019_10	0	0
Mantrijeron	Mantrijeron	2019_10	21	21	100
Muja Muju	Umbulharjo	2019_10	73	72	98.6301
Ngampilan	Ngampilan	2019_10	15	12	80
Ngupasan	Gondomanan	2019_10	34	16	47.0588
Notoprajan	Ngampilan	2019_10	32	24	75
Pakuncen	Wirobrajan	2019_10	0	0
Pandeyan	Umbulharjo	2019_10	19	1	5.26316
Panembahan	Kraton	2019_10	108	10	9.25926
Patangpuluhan	Wirobrajan	2019_10	0	0
Patehan	Kraton	2019_10	32	32	100
Prawirodirjan	Gondomanan	2019_10	16	0	0
Prenggan	Kotagede	2019_10	0	0
Pringgokusuman	Gedong Tengen	2019_10	23	23	100
Purbayan	Kotagede	2019_10	0	0
Purwokinanti	Pakualaman	2019_10	19	17	89.4737
Rejowinangun	Kotagede	2019_10	0	0
Semaki	Umbulharjo	2019_10	22	16	72.7273
Sorosutan	Umbulharjo	2019_10	50	38	76
Sosromenduran	Gedong Tengen	2019_10	30	29	96.6667
Suryatmajan	Danurejan	2019_10	15	14	93.3333
Suryodiningratan	Mantrijeron	2019_10	81	14	17.284
Tahunan	Umbulharjo	2019_10	41	21	51.2195
Tegal Panggung	Danurejan	2019_10	9	9
Tegalrejo	Tegalrejo	2019_10	0	0
Terban	Gondokusuman	2019_10	26	25	96.1538
Warungboto	Umbulharjo	2019_10	21	19	90.4762
Wirobrajan	Wirobrajan	2019_10	0	0
Wirogunan	Mergangsan	2019_10	39	39	100
Baciro	Gondokusuman	2019_11	98	89	90.8163
Bausasran	Danurejan	2019_11	25	8	32
Bener	Tegalrejo	2019_11	0	0
Brontokusuman	Mergangsan	2019_11	71	35	49.2958
Bumijo	Jetis	2019_11	71	20	28.169
Cokrodiningratan	Jetis	2019_11	42	40	95.2381
Demangan	Gondokusuman	2019_11	53	14	26.4151
Gedongkiwo	Mantrijeron	2019_11	56	15	26.7857
Giwangan	Umbulharjo	2019_11	15	0	0
Gowongan	Jetis	2019_11	42	27	64.2857
Gunung Ketur	Pakualaman	2019_11	86	22	25.5814
Kadipaten	Kraton	2019_11	26	26	100
Karangwaru	Tegalrejo	2019_11	0	0
Keparakan	Mergangsan	2019_11	31	0	0
Klitren	Gondokusuman	2019_11	15	6	40
Kotabaru	Gondokusuman	2019_11	14	10	71.4286
Kricak	Tegalrejo	2019_11	0	0
Mantrijeron	Mantrijeron	2019_11	43	31	72.093
Muja Muju	Umbulharjo	2019_11	60	60	100
Ngampilan	Ngampilan	2019_11	10	9	90
Ngupasan	Gondomanan	2019_11	37	16	43.2432
Notoprajan	Ngampilan	2019_11	49	41	83.6735
Pakuncen	Wirobrajan	2019_11	0	0
Pandeyan	Umbulharjo	2019_11	48	10	20.8333
Panembahan	Kraton	2019_11	36	22	61.1111
Patangpuluhan	Wirobrajan	2019_11	0	0
Patehan	Kraton	2019_11	55	54	98.1818
Prawirodirjan	Gondomanan	2019_11	3	0
Prenggan	Kotagede	2019_11	0	0
Pringgokusuman	Gedong Tengen	2019_11	32	31	96.875
Purbayan	Kotagede	2019_11	0	0
Purwokinanti	Pakualaman	2019_11	18	17	94.4444
Rejowinangun	Kotagede	2019_11	0	0
Semaki	Umbulharjo	2019_11	37	29	78.3784
Sorosutan	Umbulharjo	2019_11	78	54	69.2308
Sosromenduran	Gedong Tengen	2019_11	44	37	84.0909
Suryatmajan	Danurejan	2019_11	15	14	93.3333
Suryodiningratan	Mantrijeron	2019_11	41	5	12.1951
Tahunan	Umbulharjo	2019_11	26	17	65.3846
Tegal Panggung	Danurejan	2019_11	19	19	100
Tegalrejo	Tegalrejo	2019_11	0	0
Terban	Gondokusuman	2019_11	22	22	100
Warungboto	Umbulharjo	2019_11	32	29	90.625
Wirobrajan	Wirobrajan	2019_11	0	0
Wirogunan	Mergangsan	2019_11	54	50	92.5926
Baciro	Gondokusuman	2019_12	155	143	92.2581
Bausasran	Danurejan	2019_12	31	11	35.4839
Bener	Tegalrejo	2019_12	10	10	100
Brontokusuman	Mergangsan	2019_12	120	49	40.8333
Bumijo	Jetis	2019_12	74	35	47.2973
Cokrodiningratan	Jetis	2019_12	54	53	98.1481
Demangan	Gondokusuman	2019_12	48	16	33.3333
Gedongkiwo	Mantrijeron	2019_12	192	39	20.3125
Giwangan	Umbulharjo	2019_12	15	0	0
Gowongan	Jetis	2019_12	29	10	34.4828
Gunung Ketur	Pakualaman	2019_12	56	13	23.2143
Kadipaten	Kraton	2019_12	11	10	90.9091
Karangwaru	Tegalrejo	2019_12	33	31	93.9394
Keparakan	Mergangsan	2019_12	85	5	5.88235
Klitren	Gondokusuman	2019_12	22	17	77.2727
Kotabaru	Gondokusuman	2019_12	24	20	83.3333
Kricak	Tegalrejo	2019_12	16	15	93.75
Mantrijeron	Mantrijeron	2019_12	73	64	87.6712
Muja Muju	Umbulharjo	2019_12	106	96	90.566
Ngampilan	Ngampilan	2019_12	17	15	88.2353
Ngupasan	Gondomanan	2019_12	33	22	66.6667
Notoprajan	Ngampilan	2019_12	131	72	54.9618
Pakuncen	Wirobrajan	2019_12	10	9	90
Pandeyan	Umbulharjo	2019_12	36	11	30.5556
Panembahan	Kraton	2019_12	55	15	27.2727
Patangpuluhan	Wirobrajan	2019_12	22	18	81.8182
Patehan	Kraton	2019_12	43	41	95.3488
Prawirodirjan	Gondomanan	2019_12	16	2	12.5
Prenggan	Kotagede	2019_12	11	0	0
Pringgokusuman	Gedong Tengen	2019_12	46	44	95.6522
Purbayan	Kotagede	2019_12	20	0	0
Purwokinanti	Pakualaman	2019_12	23	15	65.2174
Rejowinangun	Kotagede	2019_12	9	0
Semaki	Umbulharjo	2019_12	22	21	95.4545
Sorosutan	Umbulharjo	2019_12	144	86	59.7222
Sosromenduran	Gedong Tengen	2019_12	69	60	86.9565
Suryatmajan	Danurejan	2019_12	18	17	94.4444
Suryodiningratan	Mantrijeron	2019_12	102	3	2.94118
Tahunan	Umbulharjo	2019_12	59	31	52.5424
Tegal Panggung	Danurejan	2019_12	21	21	100
Tegalrejo	Tegalrejo	2019_12	14	12	85.7143
Terban	Gondokusuman	2019_12	45	42	93.3333
Warungboto	Umbulharjo	2019_12	37	36	97.2973
Wirobrajan	Wirobrajan	2019_12	53	47	88.6792
Wirogunan	Mergangsan	2019_12	73	63	86.3014
Baciro	Gondokusuman	2020_01	325	283	87.0769
Bausasran	Danurejan	2020_01	188	87	46.2766
Bener	Tegalrejo	2020_01	0	0
Brontokusuman	Mergangsan	2020_01	419	265	63.2458
Bumijo	Jetis	2020_01	148	52	35.1351
Cokrodiningratan	Jetis	2020_01	154	148	96.1039
Demangan	Gondokusuman	2020_01	237	95	40.0844
Gedongkiwo	Mantrijeron	2020_01	294	84	28.5714
Giwangan	Umbulharjo	2020_01	131	1	0.763359
Gowongan	Jetis	2020_01	178	75	42.1348
Gunung Ketur	Pakualaman	2020_01	90	35	38.8889
Kadipaten	Kraton	2020_01	82	78	95.1219
Karangwaru	Tegalrejo	2020_01	0	0
Keparakan	Mergangsan	2020_01	177	12	6.77966
Klitren	Gondokusuman	2020_01	113	64	56.6372
Kotabaru	Gondokusuman	2020_01	136	104	76.4706
Kricak	Tegalrejo	2020_01	0	0
Mantrijeron	Mantrijeron	2020_01	192	187	97.3958
Muja Muju	Umbulharjo	2020_01	314	282	89.8089
Ngampilan	Ngampilan	2020_01	73	51	69.863
Ngupasan	Gondomanan	2020_01	109	55	50.4587
Notoprajan	Ngampilan	2020_01	182	126	69.2308
Pakuncen	Wirobrajan	2020_01	0	0
Pandeyan	Umbulharjo	2020_01	403	64	15.8809
Panembahan	Kraton	2020_01	145	50	34.4828
Patangpuluhan	Wirobrajan	2020_01	0	0
Patehan	Kraton	2020_01	80	77	96.25
Prawirodirjan	Gondomanan	2020_01	40	8	20
Pringgokusuman	Gedong Tengen	2020_01	82	79	96.3415
Purwokinanti	Pakualaman	2020_01	49	46	93.8775
Semaki	Umbulharjo	2020_01	52	46	88.4615
Sorosutan	Umbulharjo	2020_01	433	290	66.9746
Sosromenduran	Gedong Tengen	2020_01	152	115	75.6579
Suryatmajan	Danurejan	2020_01	62	60	96.7742
Suryodiningratan	Mantrijeron	2020_01	272	17	6.25
Tahunan	Umbulharjo	2020_01	160	89	55.625
Tegal Panggung	Danurejan	2020_01	58	58	100
Tegalrejo	Tegalrejo	2020_01	0	0
Terban	Gondokusuman	2020_01	193	182	94.3005
Warungboto	Umbulharjo	2020_01	127	120	94.4882
Wirobrajan	Wirobrajan	2020_01	0	0
Wirogunan	Mergangsan	2020_01	145	142	97.931
Baciro	Gondokusuman	2020_02	227	192	84.5815
Bausasran	Danurejan	2020_02	47	19	40.4255
Bener	Tegalrejo	2020_02	0	0
Brontokusuman	Mergangsan	2020_02	266	105	39.4737
Bumijo	Jetis	2020_02	117	68	58.1197
Cokrodiningratan	Jetis	2020_02	139	135	97.1223
Demangan	Gondokusuman	2020_02	139	63	45.3237
Gedongkiwo	Mantrijeron	2020_02	145	42	28.9655
Giwangan	Umbulharjo	2020_02	42	2	4.7619
Gowongan	Jetis	2020_02	103	39	37.8641
Gunung Ketur	Pakualaman	2020_02	50	39	78
Kadipaten	Kraton	2020_02	53	50	94.3396
Karangwaru	Tegalrejo	2020_02	0	0
Keparakan	Mergangsan	2020_02	236	11	4.66102
Klitren	Gondokusuman	2020_02	62	23	37.0968
Kotabaru	Gondokusuman	2020_02	65	57	87.6923
Kricak	Tegalrejo	2020_02	0	0
Mantrijeron	Mantrijeron	2020_02	150	136	90.6667
Muja Muju	Umbulharjo	2020_02	192	174	90.625
Ngampilan	Ngampilan	2020_02	31	25	80.6452
Ngupasan	Gondomanan	2020_02	49	42	85.7143
Notoprajan	Ngampilan	2020_02	63	42	66.6667
Pakuncen	Wirobrajan	2020_02	0	0
Pandeyan	Umbulharjo	2020_02	147	24	16.3265
Panembahan	Kraton	2020_02	81	29	35.8025
Patangpuluhan	Wirobrajan	2020_02	0	0
Patehan	Kraton	2020_02	59	54	91.5254
Prawirodirjan	Gondomanan	2020_02	38	6	15.7895
Pringgokusuman	Gedong Tengen	2020_02	38	37	97.3684
Purwokinanti	Pakualaman	2020_02	49	43	87.7551
Semaki	Umbulharjo	2020_02	71	59	83.0986
Sorosutan	Umbulharjo	2020_02	294	210	71.4286
Sosromenduran	Gedong Tengen	2020_02	101	70	69.3069
Suryatmajan	Danurejan	2020_02	43	38	88.3721
Suryodiningratan	Mantrijeron	2020_02	102	8	7.84314
Tahunan	Umbulharjo	2020_02	108	67	62.037
Tegal Panggung	Danurejan	2020_02	61	55	90.1639
Tegalrejo	Tegalrejo	2020_02	0	0
Terban	Gondokusuman	2020_02	109	98	89.9083
Warungboto	Umbulharjo	2020_02	114	107	93.8596
Wirobrajan	Wirobrajan	2020_02	0	0
Wirogunan	Mergangsan	2020_02	78	72	92.3077
Baciro	Gondokusuman	2020_03	163	159	97.546
Bausasran	Danurejan	2020_03	36	21	58.3333
Bener	Tegalrejo	2020_03	0	0
Brontokusuman	Mergangsan	2020_03	188	93	49.4681
Bumijo	Jetis	2020_03	108	64	59.2593
Cokrodiningratan	Jetis	2020_03	135	125	92.5926
Demangan	Gondokusuman	2020_03	88	47	53.4091
Gedongkiwo	Mantrijeron	2020_03	141	49	34.7518
Giwangan	Umbulharjo	2020_03	29	2	6.89655
Gowongan	Jetis	2020_03	111	66	59.4595
Gunung Ketur	Pakualaman	2020_03	45	18	40
Kadipaten	Kraton	2020_03	57	53	92.9825
Karangwaru	Tegalrejo	2020_03	0	0
Keparakan	Mergangsan	2020_03	240	8	3.33333
Klitren	Gondokusuman	2020_03	63	27	42.8571
Kotabaru	Gondokusuman	2020_03	35	31	88.5714
Kricak	Tegalrejo	2020_03	0	0
Mantrijeron	Mantrijeron	2020_03	88	84	95.4545
Muja Muju	Umbulharjo	2020_03	248	213	85.8871
Ngampilan	Ngampilan	2020_03	27	8	29.6296
Ngupasan	Gondomanan	2020_03	73	54	73.9726
Notoprajan	Ngampilan	2020_03	108	64	59.2593
Pakuncen	Wirobrajan	2020_03	0	0
Pandeyan	Umbulharjo	2020_03	84	6	7.14286
Panembahan	Kraton	2020_03	72	22	30.5556
Patangpuluhan	Wirobrajan	2020_03	0	0
Patehan	Kraton	2020_03	39	38	97.4359
Prawirodirjan	Gondomanan	2020_03	53	19	35.8491
Pringgokusuman	Gedong Tengen	2020_03	71	66	92.9577
Purwokinanti	Pakualaman	2020_03	54	47	87.037
Semaki	Umbulharjo	2020_03	45	41	91.1111
Sorosutan	Umbulharjo	2020_03	151	119	78.8079
Sosromenduran	Gedong Tengen	2020_03	64	35	54.6875
Suryatmajan	Danurejan	2020_03	46	44	95.6522
Suryodiningratan	Mantrijeron	2020_03	93	12	12.9032
Tahunan	Umbulharjo	2020_03	91	53	58.2418
Tegal Panggung	Danurejan	2020_03	82	81	98.7805
Tegalrejo	Tegalrejo	2020_03	0	0
Terban	Gondokusuman	2020_03	81	79	97.5309
Warungboto	Umbulharjo	2020_03	139	124	89.2086
Wirobrajan	Wirobrajan	2020_03	0	0
Wirogunan	Mergangsan	2020_03	84	81	96.4286
Cokrodiningratan	Jetis	2020_07	0	0
Baciro	Gondokusuman	2020_08	96	94	97.9167
Bausasran	Danurejan	2020_08	10	6	60
Bener	Tegalrejo	2020_08	1	1
Brontokusuman	Mergangsan	2020_08	62	33	53.2258
Bumijo	Jetis	2020_08	47	29	61.7021
Cokrodiningratan	Jetis	2020_08	26	26	100
Demangan	Gondokusuman	2020_08	93	56	60.2151
Gedongkiwo	Mantrijeron	2020_08	64	22	34.375
Giwangan	Umbulharjo	2020_08	31	2	6.45161
Gowongan	Jetis	2020_08	33	18	54.5455
Gunung Ketur	Pakualaman	2020_08	24	24	100
Kadipaten	Kraton	2020_08	40	40	100
Karangwaru	Tegalrejo	2020_08	0	0
Keparakan	Mergangsan	2020_08	42	7	16.6667
Klitren	Gondokusuman	2020_08	46	31	67.3913
Kotabaru	Gondokusuman	2020_08	20	20	100
Kricak	Tegalrejo	2020_08	4	4
Mantrijeron	Mantrijeron	2020_08	48	48	100
Muja Muju	Umbulharjo	2020_08	62	61	98.3871
Ngampilan	Ngampilan	2020_08	8	8
Ngupasan	Gondomanan	2020_08	19	5	26.3158
Notoprajan	Ngampilan	2020_08	39	30	76.9231
Pakuncen	Wirobrajan	2020_08	1	1
Pandeyan	Umbulharjo	2020_08	53	12	22.6415
Panembahan	Kraton	2020_08	31	4	12.9032
Patangpuluhan	Wirobrajan	2020_08	2	2
Patehan	Kraton	2020_08	13	13	100
Prawirodirjan	Gondomanan	2020_08	24	12	50
Pringgokusuman	Gedong Tengen	2020_08	9	8
Purwokinanti	Pakualaman	2020_08	15	14	93.3333
Semaki	Umbulharjo	2020_08	31	28	90.3226
Sorosutan	Umbulharjo	2020_08	89	64	71.9101
Sosromenduran	Gedong Tengen	2020_08	19	16	84.2105
Suryatmajan	Danurejan	2020_08	13	12	92.3077
Suryodiningratan	Mantrijeron	2020_08	64	23	35.9375
Tahunan	Umbulharjo	2020_08	47	38	80.8511
Tegal Panggung	Danurejan	2020_08	7	7
Tegalrejo	Tegalrejo	2020_08	0	0
Terban	Gondokusuman	2020_08	42	41	97.619
Warungboto	Umbulharjo	2020_08	38	37	97.3684
Wirobrajan	Wirobrajan	2020_08	1	1
Wirogunan	Mergangsan	2020_08	36	35	97.2222
Bausasran	Danurejan	2020_10	0	0
Brontokusuman	Mergangsan	2020_10	12	0	0
Bumijo	Jetis	2020_10	8	2
Demangan	Gondokusuman	2020_10	2	1
Gedongkiwo	Mantrijeron	2020_10	20	0	0
Giwangan	Umbulharjo	2020_10	52	16	30.7692
Gowongan	Jetis	2020_10	12	8	66.6667
Gunung Ketur	Pakualaman	2020_10	11	10	90.9091
Keparakan	Mergangsan	2020_10	20	3	15
Klitren	Gondokusuman	2020_10	10	0	0
Kotabaru	Gondokusuman	2020_10	9	9
Muja Muju	Umbulharjo	2020_10	7	6
Ngampilan	Ngampilan	2020_10	4	4
Ngupasan	Gondomanan	2020_10	3	0
Notoprajan	Ngampilan	2020_10	7	2
Pandeyan	Umbulharjo	2020_10	13	7	53.8462
Panembahan	Kraton	2020_10	7	2
Prawirodirjan	Gondomanan	2020_10	4	2
Prenggan	Kotagede	2020_10	41	18	43.9024
Purbayan	Kotagede	2020_10	8	1
Rejowinangun	Kotagede	2020_10	24	10	41.6667
Sorosutan	Umbulharjo	2020_10	10	3	30
Sosromenduran	Gedong Tengen	2020_10	0	0
Suryodiningratan	Mantrijeron	2020_10	5	2
Tahunan	Umbulharjo	2020_10	3	3
Warungboto	Umbulharjo	2020_10	6	6
Bausasran	Danurejan	2020_11	4	4
Brontokusuman	Mergangsan	2020_11	14	3	21.4286
Bumijo	Jetis	2020_11	6	5
Demangan	Gondokusuman	2020_11	5	1
Gedongkiwo	Mantrijeron	2020_11	31	8	25.8065
Giwangan	Umbulharjo	2020_11	24	19	79.1667
Gowongan	Jetis	2020_11	11	9	81.8182
Gunung Ketur	Pakualaman	2020_11	6	5
Keparakan	Mergangsan	2020_11	31	5	16.129
Klitren	Gondokusuman	2020_11	13	1	7.69231
Kotabaru	Gondokusuman	2020_11	10	9	90
Muja Muju	Umbulharjo	2020_11	0	0
Ngampilan	Ngampilan	2020_11	2	2
Ngupasan	Gondomanan	2020_11	9	5
Notoprajan	Ngampilan	2020_11	9	5
Pandeyan	Umbulharjo	2020_11	23	14	60.8696
Panembahan	Kraton	2020_11	34	4	11.7647
Prawirodirjan	Gondomanan	2020_11	4	2
Prenggan	Kotagede	2020_11	40	16	40
Purbayan	Kotagede	2020_11	32	13	40.625
Rejowinangun	Kotagede	2020_11	18	9	50
Sorosutan	Umbulharjo	2020_11	8	5
Sosromenduran	Gedong Tengen	2020_11	6	5
Suryodiningratan	Mantrijeron	2020_11	25	9	36
Tahunan	Umbulharjo	2020_11	5	4
Warungboto	Umbulharjo	2020_11	3	3
Bausasran	Danurejan	2020_12	1	1
Brontokusuman	Mergangsan	2020_12	5	2
[truncated: 132 more rows]

## Sheet: 2023_2024_Kecematan
Kecematan	Aegypti tested_2023	wMel pos_2023	wMel %_2023	Aegypti tested_2024	wMel pos_2024	wMel %_2024
Danurejan	94	87	0.925532	90	78	0.866667
Gedong Tengen	94	83	0.882979	100	89	0.89
Gondokusuman	100	82	0.82	100	90	0.9
Gondomanan	99	95	0.959596	93	80	0.860215
Jetis	95	92	0.968421	90	84	0.933333
Kotagede	88	75	0.852273	92	79	0.858696
Kraton	94	85	0.904255	97	92	0.948454
Mantrijeron	99	91	0.919192	95	72	0.757895
Mergangsan	94	79	0.840426	98	84	0.857143
Ngampilan	90	87	0.966667	95	81	0.852632
Pakualaman	98	95	0.969388	97	79	0.814433
Tegalrejo	88	79	0.897727	100	94	0.94
Umbulharjo	87	84	0.965517	100	82	0.82
Wirobrajan	95	85	0.894737	99	87	0.878788
Grand Total	1315	1199	0.911787	1346	1171	0.869985
